# Supplementary material for: Hydroborative reduction of amides to amines mediated by La(CH2C6H4NMe2-o)3
Source: Royal Society of Chemistry journal article supplement (doi:10.1039/d1nj04996h), 2021-12-01
Supplement: d1nj04996h1.pdf [file d1nj04996h1.pdf]

## Supporting Information for

### Hydroborative reduction of amides to amines mediated by

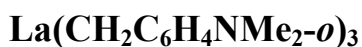

Fangcao Zhang,<sup>a</sup> Chenjun Guo,<sup>a</sup> Mingliang Gong,<sup>c</sup> Hongzhen Xie,<sup>\*,a</sup> and Yunjie

Luo<sup>\*,a,b</sup>

<sup>a</sup> *School of Materials Science and Chemical Engineering, Ningbo University, Ningbo*

*315211, P. R. China*

<sup>b</sup> *Key Laboratory of Advanced Mass Spectrometry and Molecular Analysis of*

*Zhejiang Province, Ningbo 315211, P. R. China*

<sup>c</sup> *The Barstow School Ningbo Campus, Ningbo 315201, P. R. China*

\*E-mail: [luoyunjie@nbu.edu.cn](mailto:luoyunjie@nbu.edu.cn)

[xiehongzhen@nbu.edu.cn](mailto:xiehongzhen@nbu.edu.cn)

### Table of Contents

|                                                                                                                                                                                |    |
|--------------------------------------------------------------------------------------------------------------------------------------------------------------------------------|----|
| 1. Optimization of the reaction conditions. ....                                                                                                                               | 2  |
| 2. <sup>1</sup> H NMR monitoring of the reaction between La(CH <sub>2</sub> C <sub>6</sub> H <sub>4</sub> NMe <sub>2</sub> - <i>o</i> ) <sub>3</sub> and HBpin. ....           | 4  |
| 3. <sup>1</sup> H NMR monitoring of the reaction between La(CH <sub>2</sub> C <sub>6</sub> H <sub>4</sub> NMe <sub>2</sub> - <i>o</i> ) <sub>3</sub> and secondary amide. .... | 9  |
| 4. <sup>1</sup> H NMR monitoring of the reaction between La(CH <sub>2</sub> C <sub>6</sub> H <sub>4</sub> NMe <sub>2</sub> - <i>o</i> ) <sub>3</sub> and primary amide. ....   | 11 |
| 5. Control experiments of N-Phenylbenzamide with pinacolborane catalyzed by La(CH <sub>2</sub> C <sub>6</sub> H <sub>4</sub> NMe <sub>2</sub> - <i>o</i> ) <sub>3</sub> . .... | 14 |
| 6. Proposed mechanism for the deoxygenative reduction of secondary and tertiary amides. ....                                                                                   | 16 |
| 7. <sup>1</sup> H NMR spectrum of gram scale preparation. ....                                                                                                                 | 18 |
| 8. <sup>1</sup> H NMR spectroscopy of amines. ....                                                                                                                             | 20 |
| 9. References. ....                                                                                                                                                            | 79 |

**1. Table S1. Optimization of the reaction conditions for the reduction of N,N-dimethylbenzamide<sup>a</sup>.**

| Entry | Catalyst                                                                           | [cat.]/[Amide]<br>(mol%) | T/°C | t/h | Yield/% <sup>b</sup> |
|-------|------------------------------------------------------------------------------------|--------------------------|------|-----|----------------------|
| 1     | La(CH <sub>2</sub> C <sub>6</sub> H <sub>4</sub> NMe <sub>2</sub> -o) <sub>3</sub> | 5                        | 25   | 4   | 95                   |
| 2     | Y(CH <sub>2</sub> C <sub>6</sub> H <sub>4</sub> NMe <sub>2</sub> -o) <sub>3</sub>  | 5                        | 25   | 4   | 54                   |
| 3     | Sc(CH <sub>2</sub> C <sub>6</sub> H <sub>4</sub> NMe <sub>2</sub> -o) <sub>3</sub> | 5                        | 25   | 4   | 45                   |
| 4     | La(CH <sub>2</sub> C <sub>6</sub> H <sub>4</sub> NMe <sub>2</sub> -o) <sub>3</sub> | 3                        | 25   | 4   | 56                   |
| 5     | La(CH <sub>2</sub> C <sub>6</sub> H <sub>4</sub> NMe <sub>2</sub> -o) <sub>3</sub> | 1                        | 25   | 4   | 23                   |

<sup>a</sup>Reaction conditions: Amide (0.25 mmol), and HBpin (1.25 mmol, 5 equiv) in C<sub>6</sub>D<sub>6</sub> (1 mL total volume). <sup>b</sup>yields of amine products calculated by integration vs a 1,3,5-trimethylbenzene internal standard.

**1. Table S2. Optimization of the reaction conditions for the reduction of 4-Fluorobenzamide<sup>a</sup>.**

| Entry | Catalyst                                                                           | [cat.]/[Amide]<br>(mol%) | T(°C) | T(h) | Yield(%) <sup>b</sup> |
|-------|------------------------------------------------------------------------------------|--------------------------|-------|------|-----------------------|
| 1     | La(CH <sub>2</sub> C <sub>6</sub> H <sub>4</sub> NMe <sub>2</sub> -o) <sub>3</sub> | 1                        | 120   | 24   | 51                    |
| 2     | La(CH <sub>2</sub> C <sub>6</sub> H <sub>4</sub> NMe <sub>2</sub> -o) <sub>3</sub> | 3                        | 120   | 24   | 75                    |
| 3     | La(CH <sub>2</sub> C <sub>6</sub> H <sub>4</sub> NMe <sub>2</sub> -o) <sub>3</sub> | 5                        | 120   | 24   | 98                    |
| 4     | La(CH <sub>2</sub> C <sub>6</sub> H <sub>4</sub> NMe <sub>2</sub> -o) <sub>3</sub> | 5                        | 25    | 24   | -                     |
| 5     | La(CH <sub>2</sub> C <sub>6</sub> H <sub>4</sub> NMe <sub>2</sub> -o) <sub>3</sub> | 5                        | 60    | 24   | 23                    |
| 6     | La(CH <sub>2</sub> C <sub>6</sub> H <sub>4</sub> NMe <sub>2</sub> -o) <sub>3</sub> | 5                        | 80    | 24   | 52                    |
| 7     | La(CH <sub>2</sub> C <sub>6</sub> H <sub>4</sub> NMe <sub>2</sub> -o) <sub>3</sub> | 5                        | 100   | 24   | 87                    |
| 8     | La(CH <sub>2</sub> C <sub>6</sub> H <sub>4</sub> NMe <sub>2</sub> -o) <sub>3</sub> | 5                        | 100   | 24   | 85 <sup>c</sup>       |
| 9     | La(CH <sub>2</sub> C <sub>6</sub> H <sub>4</sub> NMe <sub>2</sub> -o) <sub>3</sub> | 5                        | 100   | 24   | 71 <sup>d</sup>       |
| 10    | La(CH <sub>2</sub> C <sub>6</sub> H <sub>4</sub> NMe <sub>2</sub> -o) <sub>3</sub> | 5                        | 100   | 24   | 35 <sup>e</sup>       |
| 11    | Y(CH <sub>2</sub> C <sub>6</sub> H <sub>4</sub> NMe <sub>2</sub> -o) <sub>3</sub>  | 5                        | 120   | 24   | 79                    |
| 12    | Sc(CH <sub>2</sub> C <sub>6</sub> H <sub>4</sub> NMe <sub>2</sub> -o) <sub>3</sub> | 5                        | 120   | 24   | 71                    |
| 13    | No catalyst                                                                        | -                        | 120   | 36   | 52                    |

<sup>a</sup>Reaction conditions: Amide (0.25 mmol), and HBpin (1.25 mmol, 5 equiv) in C<sub>6</sub>D<sub>6</sub> (1 mL total volume). <sup>b</sup>yields of amine products calculated by integration vs a 1,3,5-trimethylbenzene internal standard. <sup>c</sup>8 equiv HBpin. <sup>d</sup>4 equiv HBpin. <sup>e</sup>2 equiv HBpin.

2.  $^1\text{H}$  NMR monitoring of the reaction between  $\text{La}(\text{CH}_2\text{C}_6\text{H}_4\text{NMe}_2\text{-}o)_3$  and HBpin.

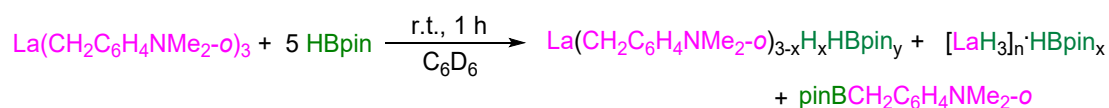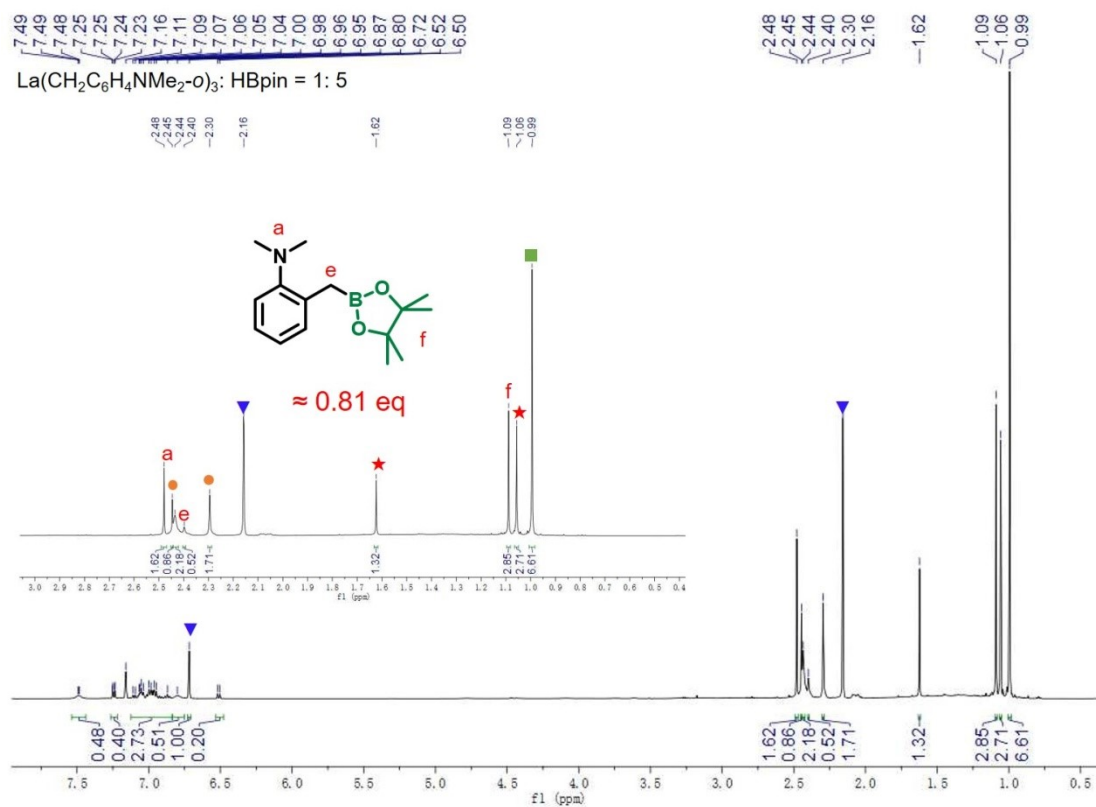

**Fig. S1.**  $^1\text{H}$  NMR spectrum of the reaction of  $\text{La}(\text{CH}_2\text{C}_6\text{H}_4\text{NMe}_2\text{-}o)_3$  with 5 equiv HBpin for 1 h, ● =  $\text{La}(\text{CH}_2\text{C}_6\text{H}_4\text{NMe}_2\text{-}o)_{3-x}\text{H}_x\text{HBpin}_y$ , ★ =  $\text{B}_2(\text{OC}(\text{CH}_3)_2\text{C}(\text{CH}_3)_2\text{O})_3$ , ■ = excess HBpin, ▼ = 1,3,5-trimethylbenzene (500 MHz,  $\text{C}_6\text{D}_6$ , 25 °C).

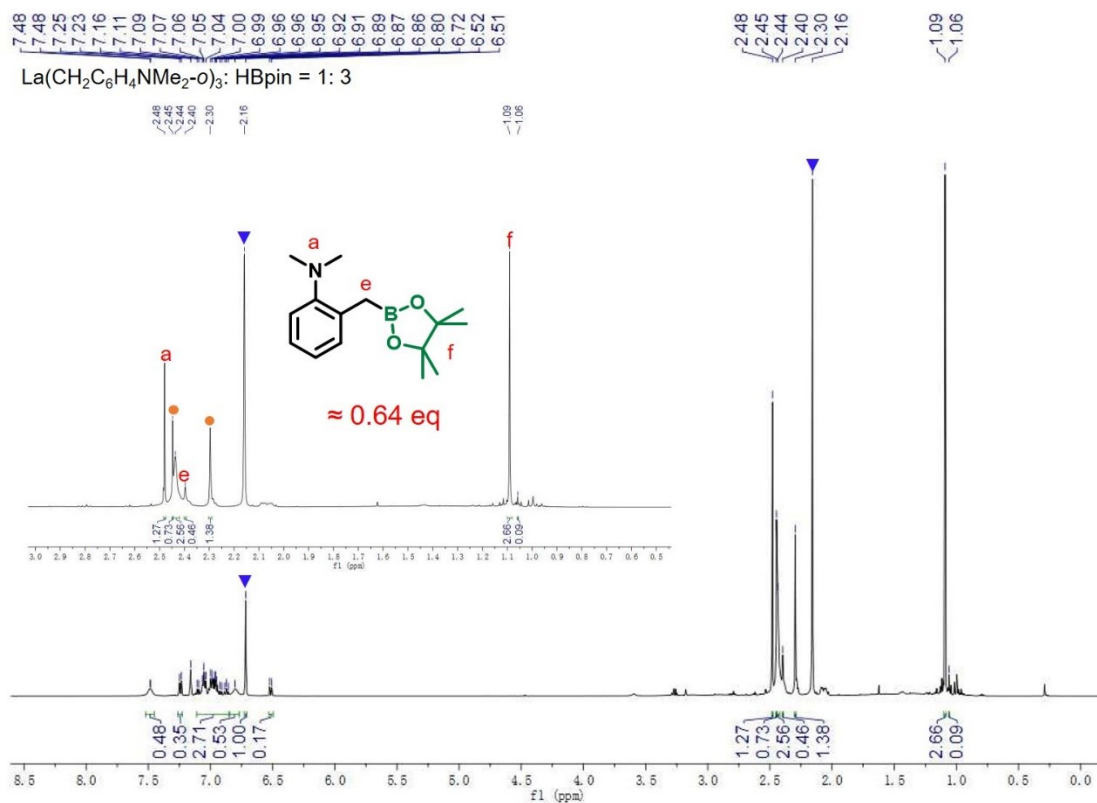

**Fig. S2.**  $^1\text{H}$  NMR spectrum of the reaction of  $\text{La}(\text{CH}_2\text{C}_6\text{H}_4\text{NMe}_2\text{-}o)_3$  with 3 equiv HBpin for 1 h, ● =  $\text{La}(\text{CH}_2\text{C}_6\text{H}_4\text{NMe}_2\text{-}o)_{3-x}\text{H}_x\text{HBpin}_y$ , ▼ = 1,3,5-trimethylbenzene (500 MHz,  $\text{C}_6\text{D}_6$ , 25 °C).

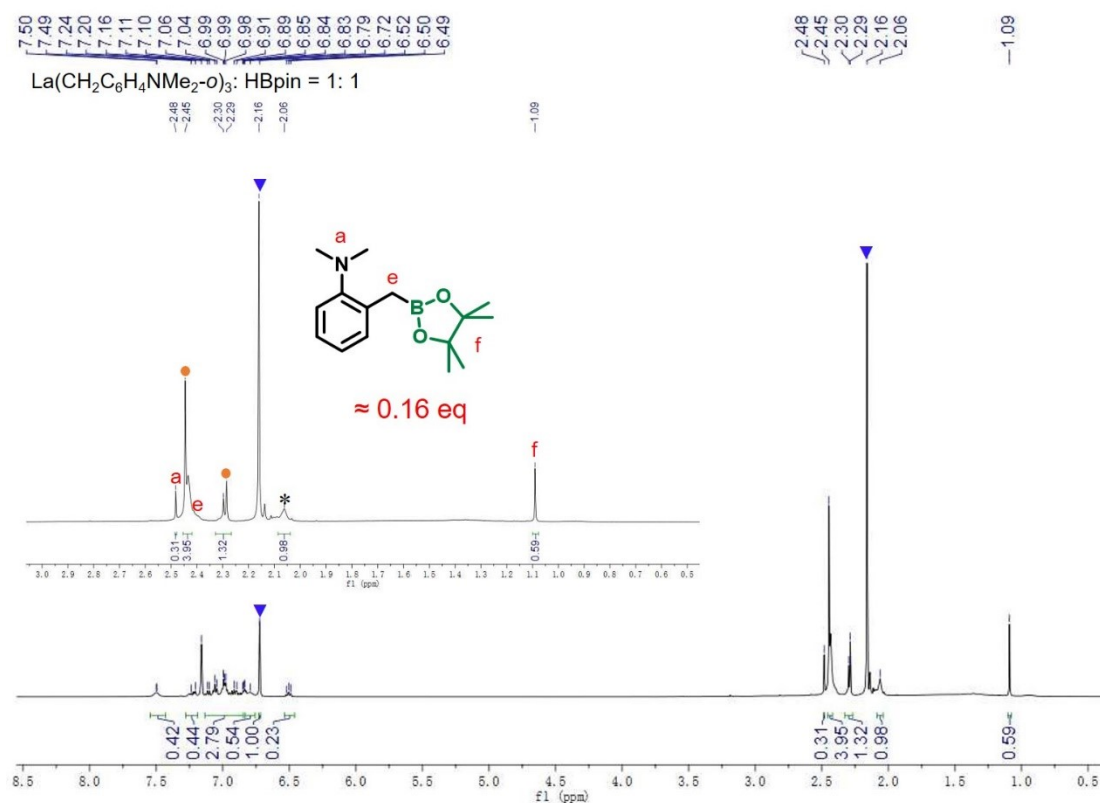

**Fig. S3.**  $^1\text{H}$  NMR spectrum of the reaction of  $\text{La}(\text{CH}_2\text{C}_6\text{H}_4\text{NMe}_2-o)_3$  with 1 equiv HBpin for 1 h, ● =  $\text{La}(\text{CH}_2\text{C}_6\text{H}_4\text{NMe}_2-o)_{3-x}\text{H}_x\text{HBpin}_y$ , \* =  $\text{La}(\text{CH}_2\text{C}_6\text{H}_4\text{NMe}_2-o)_3$ , ▼ = 1,3,5-trimethylbenzene (500 MHz,  $\text{C}_6\text{D}_6$ , 25 °C).

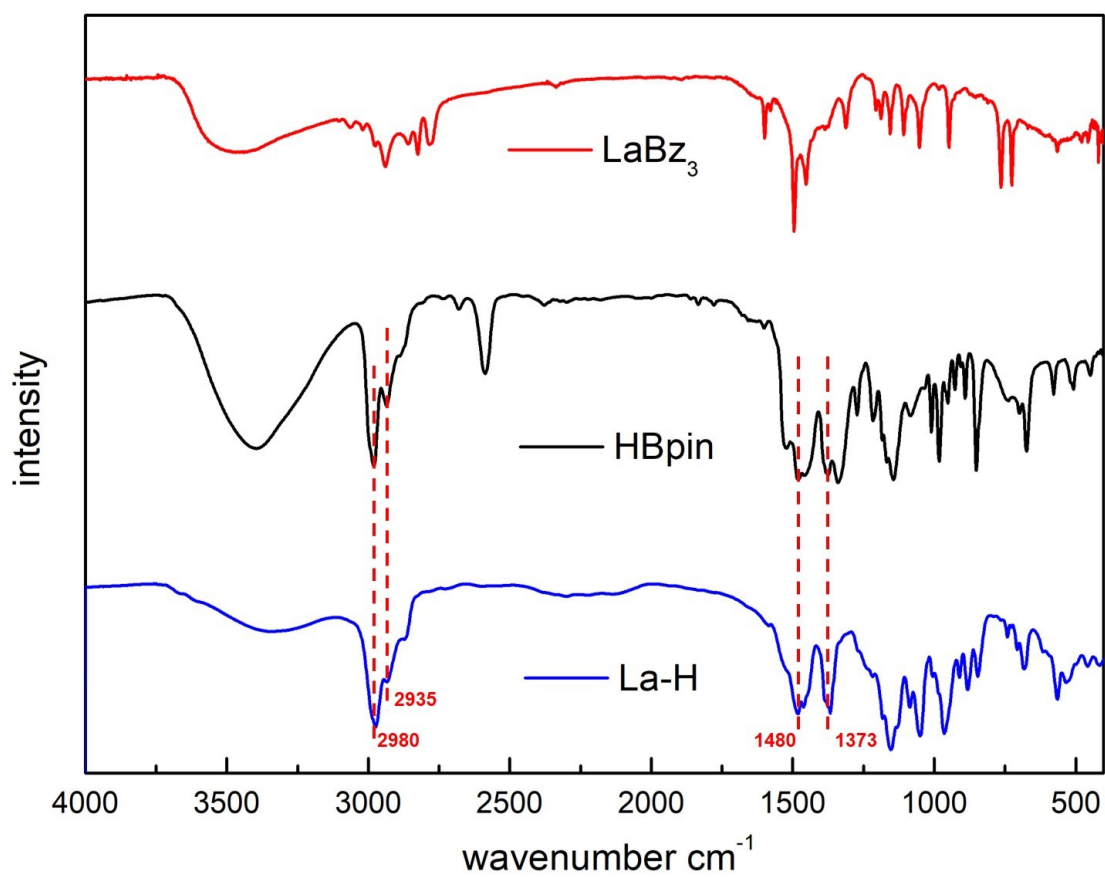

**Fig. S4.** The FT-IR spectra (KBr) of the insoluble materials  $(\text{La}(\text{CH}_2\text{C}_6\text{H}_4\text{NMe}_2\text{-}o)_3)_x \cdot \text{H}_x \text{HBpin}_y$  or  $[\text{LaH}_3]_n \cdot \text{HBpin}_x$  from the reaction of  $\text{La}(\text{CH}_2\text{C}_6\text{H}_4\text{NMe}_2\text{-}o)_3$  with  $\text{HBpin}$  (5 eq).

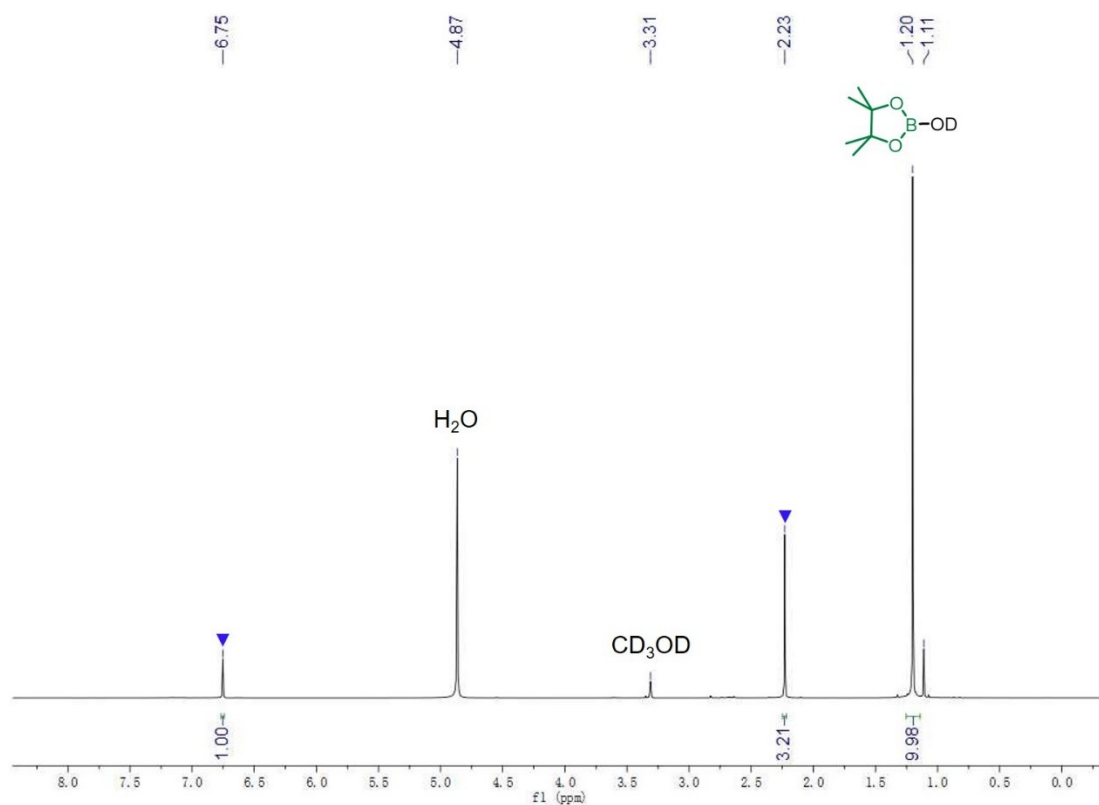

**Fig. S5.** <sup>1</sup>H NMR spectrum of the hydrolysis product of the insoluble material with CD<sub>3</sub>OD. ▼ = 1,3,5-trimethylbenzene (500 MHz, CD<sub>3</sub>OD, 25 °C).



3.  $^1\text{H}$  NMR monitoring of the reaction between  $\text{La}(\text{CH}_2\text{C}_6\text{H}_4\text{NMe}_2\text{-}o)_3$  and secondary amide.

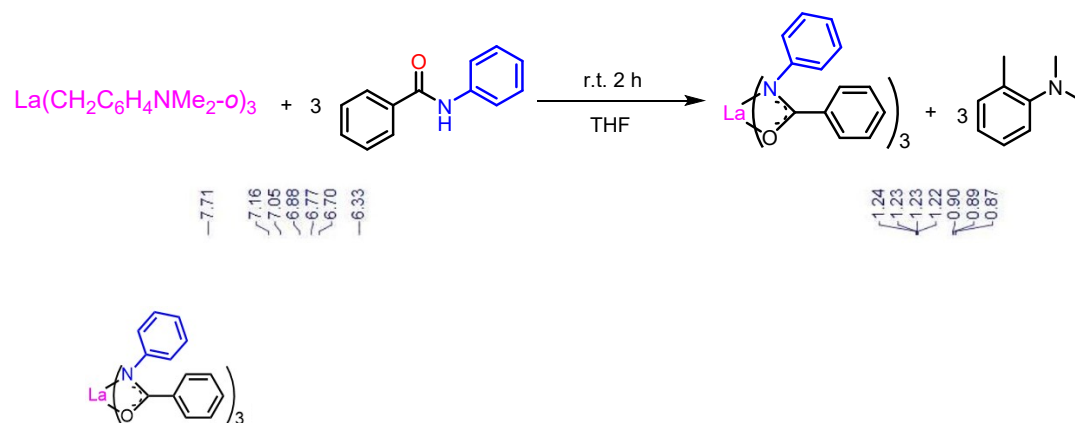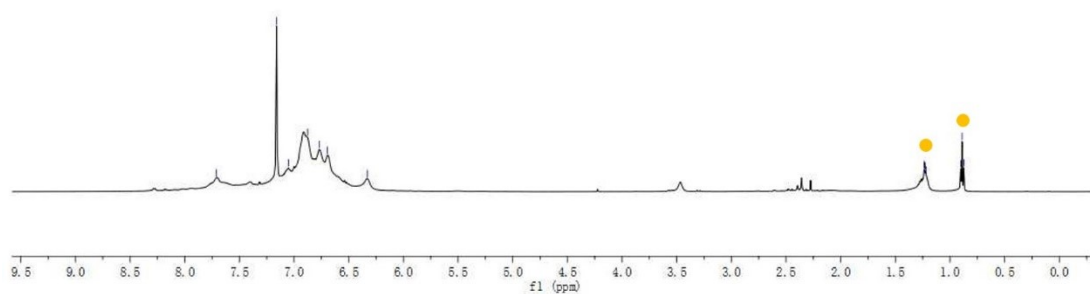

**Fig. S6.**  $^1\text{H}$  NMR spectrum of lanthanum tris-amidate complex. ● = residual n-hexane (500 MHz,  $\text{C}_6\text{D}_6$ , 25 °C).

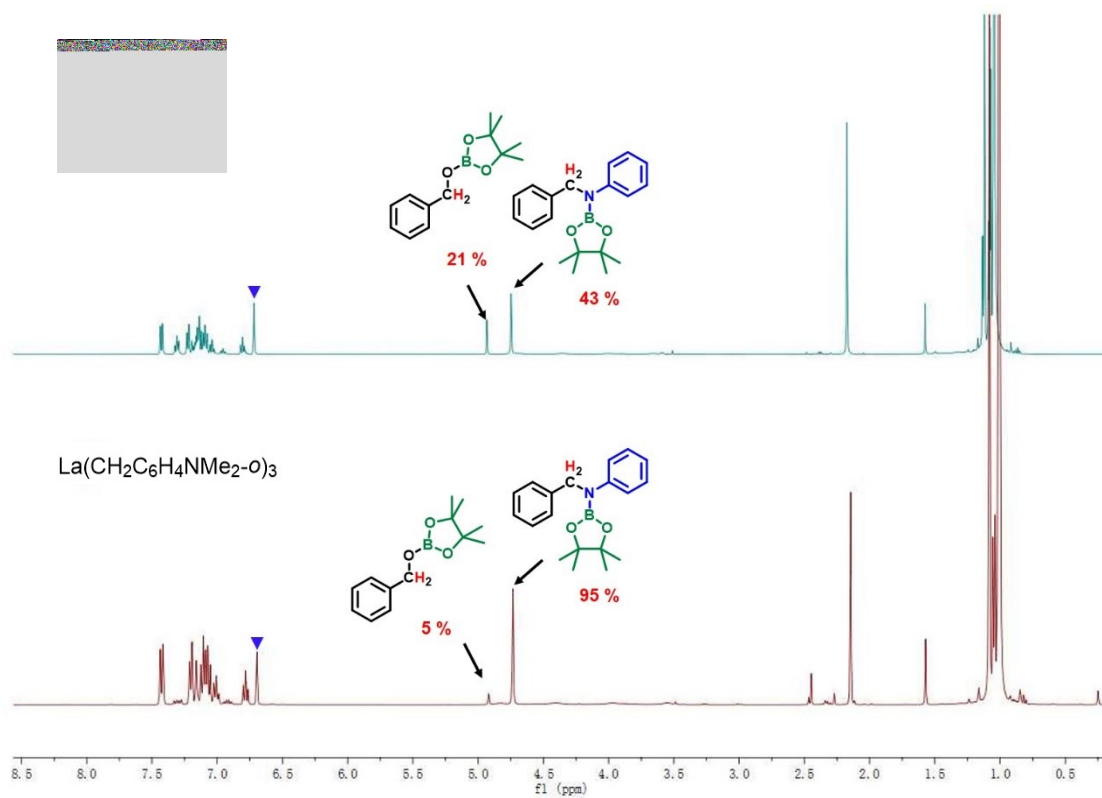

**Fig. S7.**  $^1\text{H}$  NMR spectrum of the reduction products of N-phenylbenzamide with HBpin using lanthanum tris-amidate complex or  $\text{La}(\text{CH}_2\text{C}_6\text{H}_4\text{NMe}_2\text{-}o)_3$ .  $\blacktriangledown$  = 1,3,5-trimethylbenzene (500 MHz,  $\text{C}_6\text{D}_6$ , 25  $^\circ\text{C}$ ).

4.  $^1\text{H}$  NMR monitoring of the reaction between  $\text{La}(\text{CH}_2\text{C}_6\text{H}_4\text{NMe}_2\text{-}o)_3$  and primary amide.

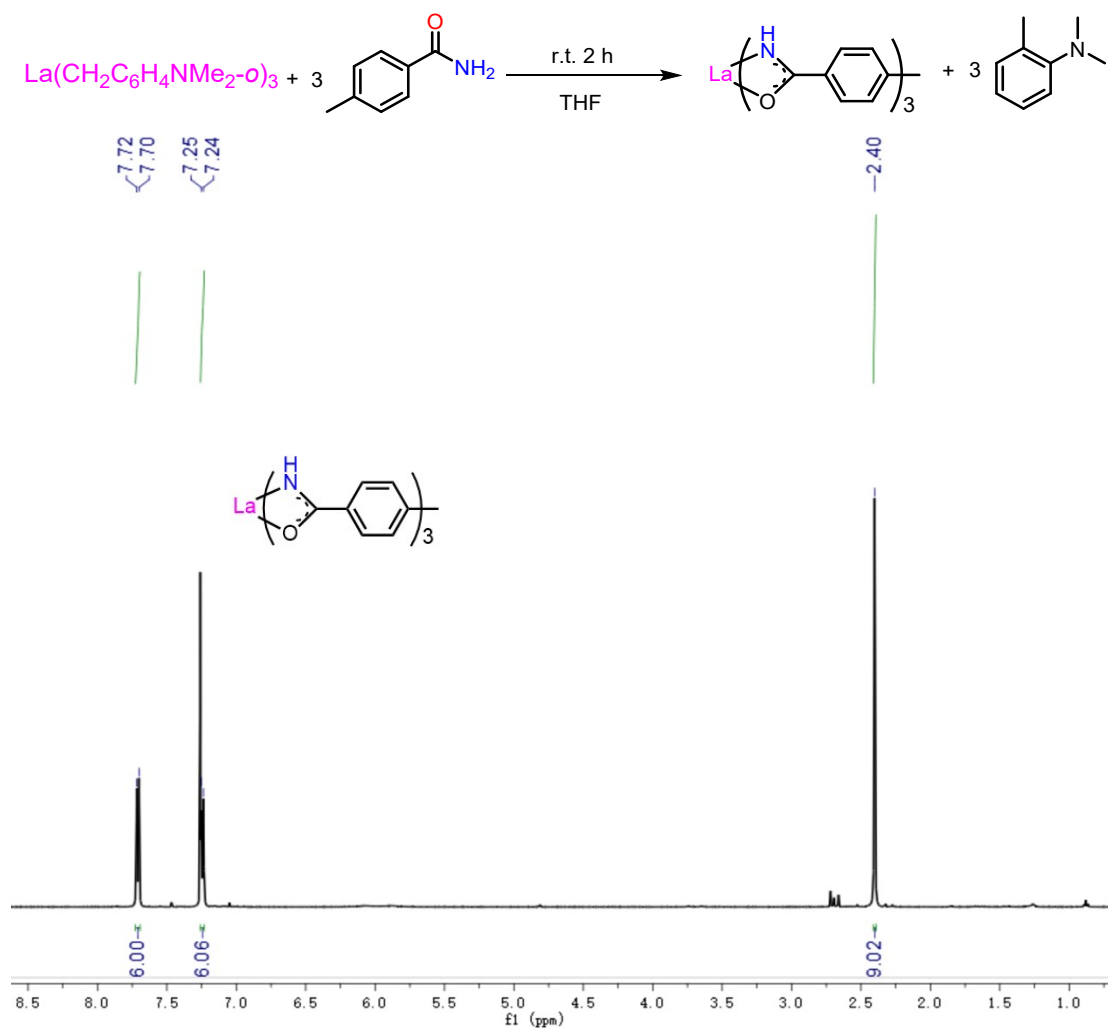

**Fig. S8.**  $^1\text{H}$  NMR spectrum of lanthanum tris-amidate complex (500 MHz,  $\text{CDCl}_3$ , 25  $^\circ\text{C}$ ).

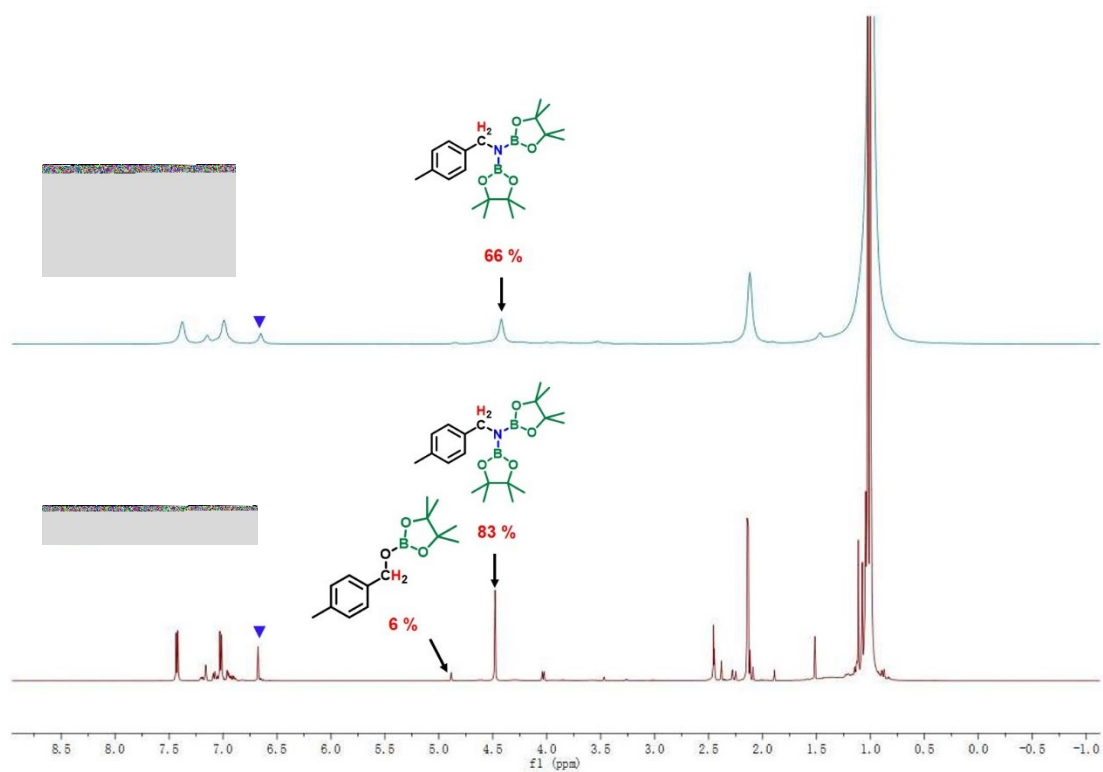

**Fig. S9.** <sup>1</sup>H NMR spectrum of the reduction products of 4-methylbenzamide with HBpin using lanthanum tris-amidate complex or  $\text{La}(\text{CH}_2\text{C}_6\text{H}_4\text{NMe}_2\text{-}o)_3$ .  $\blacktriangledown$  = 1,3,5-trimethylbenzene (500 MHz,  $\text{C}_6\text{D}_6$ , 25 °C).

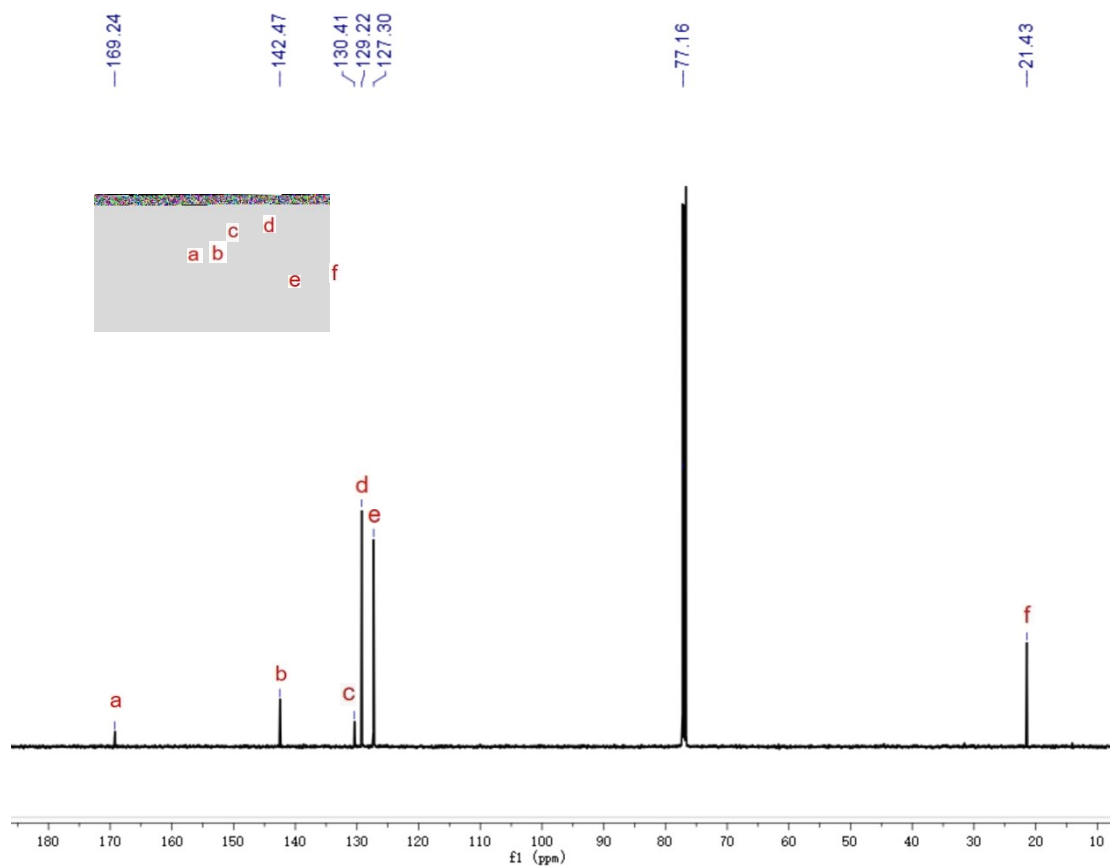

**Fig. S10.**  $^{13}\text{C}$  NMR spectrum of lanthanum tris-amidate complex (126 MHz,  $\text{CDCl}_3$ , ppm):  $\delta$  169.24 (-OCN), 142.47 ( $-\text{C}_6\text{H}_4$ ), 130.41 ( $-\text{C}_6\text{H}_4$ ), 129.22 ( $-\text{C}_6\text{H}_4$ ), 127.30 ( $-\text{C}_6\text{H}_4$ ), 21.43 ( $-\text{CH}_3$ ).

**5. Control experiments of N-Phenylbenzamide with pinacolborane catalyzed by  $\text{La}(\text{CH}_2\text{C}_6\text{H}_4\text{NMe}_2\text{-}o)_3$**

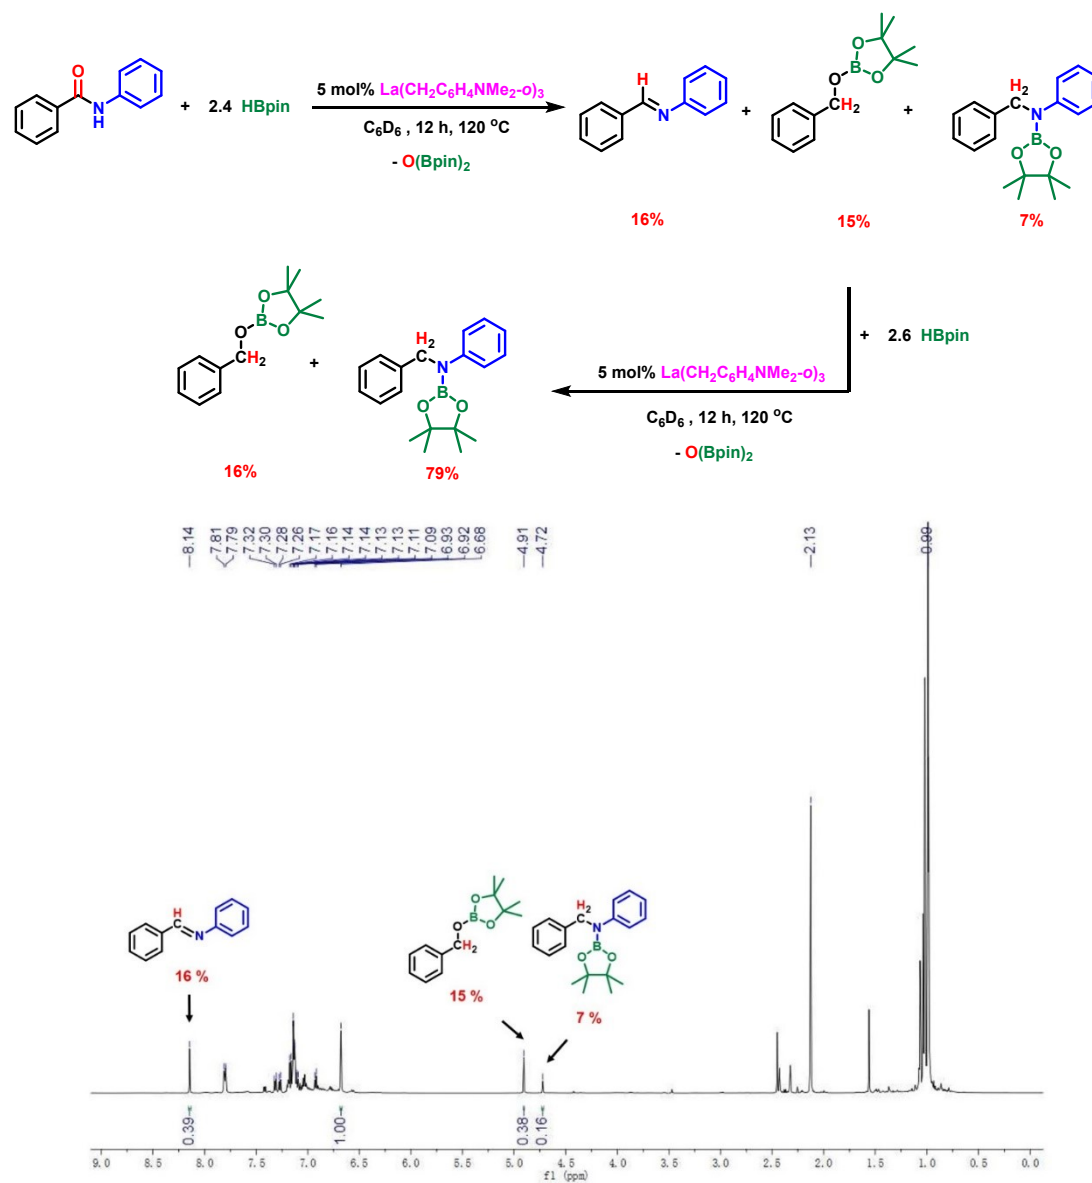

**Fig. S11.**  $^1\text{H}$  NMR spectrum of the products generated in situ from the reaction of N-phenylbenzamide with 2.4 equiv pinacolborane catalyzed by  $\text{La}(\text{CH}_2\text{C}_6\text{H}_4\text{NMe}_2\text{-}o)_3$  (500 MHz,  $\text{C}_6\text{D}_6$ , 25 °C).

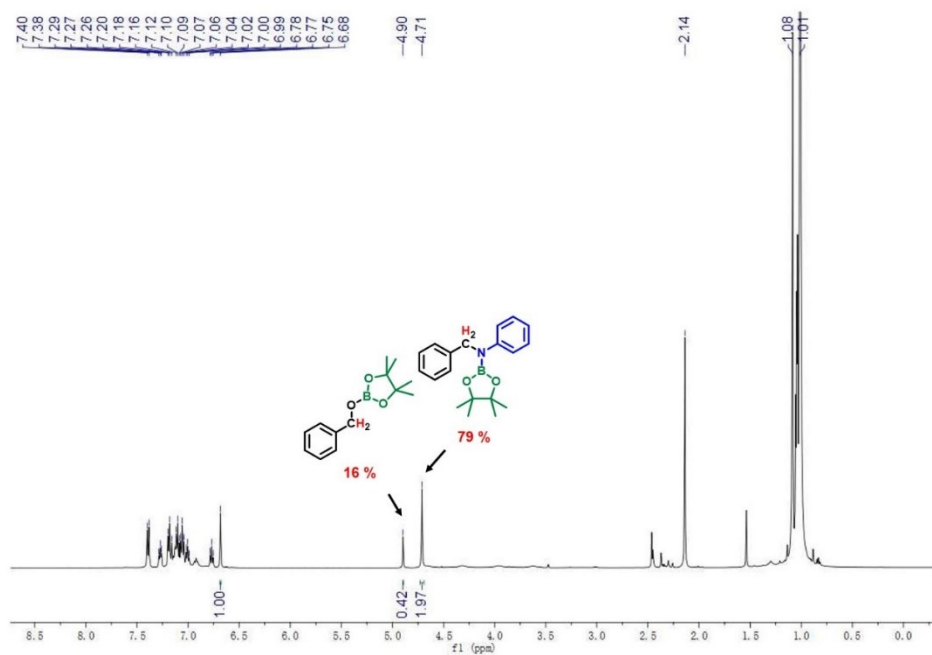

**Fig. S12.** <sup>1</sup>H NMR spectrum of the products generated in situ from the reaction of the resulting mixture with 2.6 equiv pinacolborane catalyzed by  $\text{La}(\text{CH}_2\text{C}_6\text{H}_4\text{NMe}_2\text{-}o)_3$  (500 MHz,  $\text{C}_6\text{D}_6$ , 25 °C).

## 6. Proposed mechanism for the deoxygenative reduction of secondary and tertiary amides.

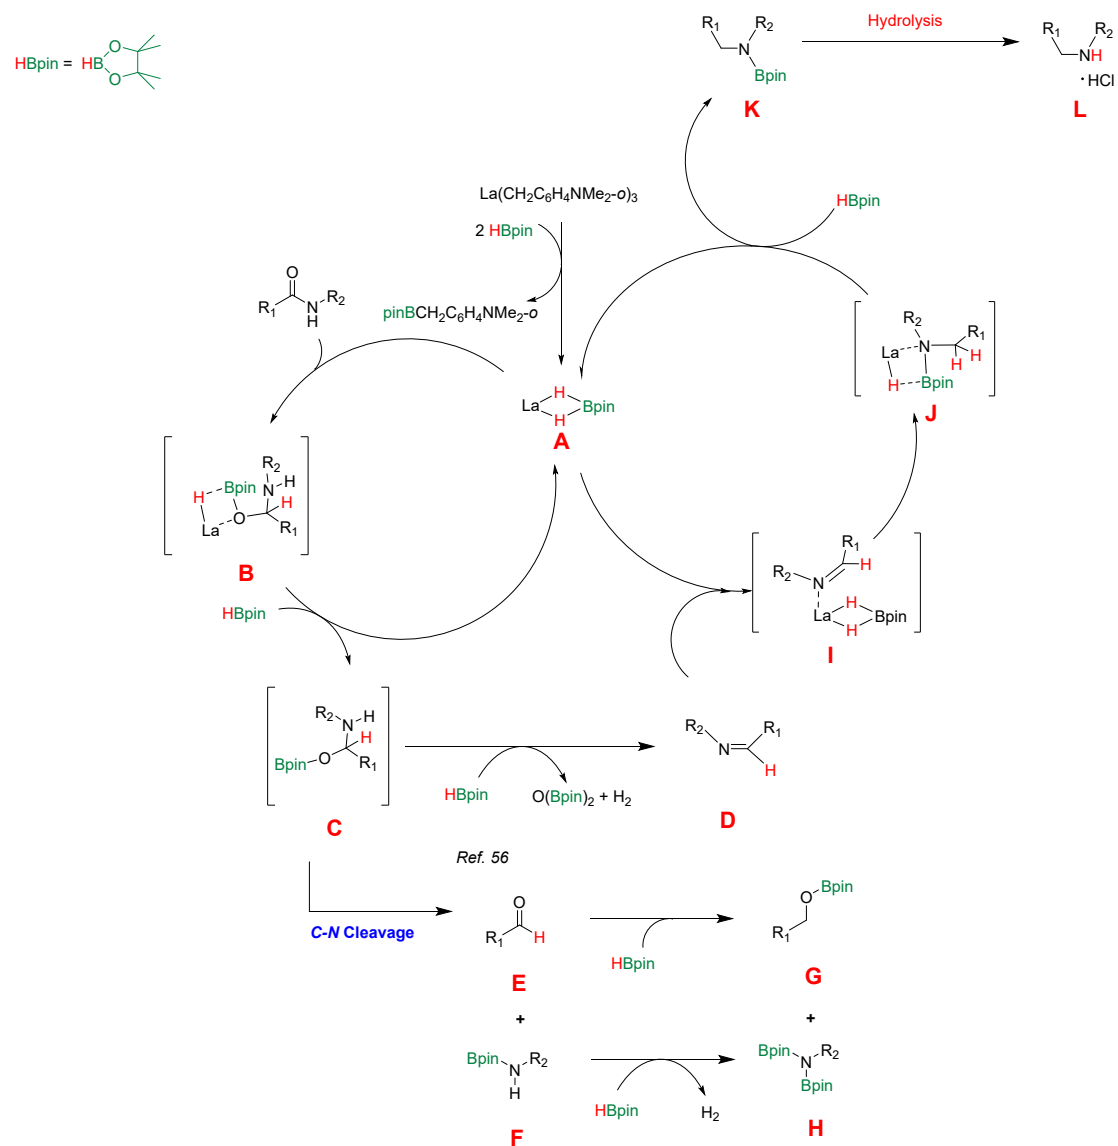

**Scheme S1.** Proposed mechanism for the deoxygenative reduction of secondary amides catalyzed by  $\text{La}(\text{CH}_2\text{C}_6\text{H}_4\text{NMe}_2\text{-o})_3$ .



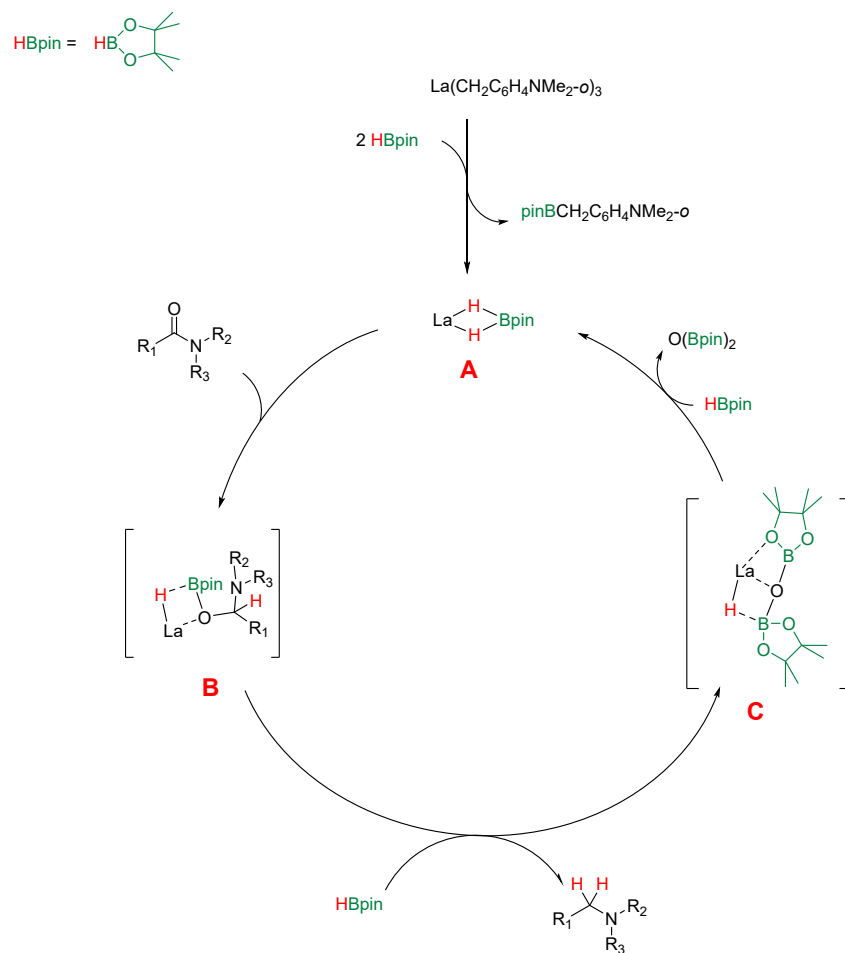

**Scheme S2.** Proposed mechanism for the deoxygenative reduction of tertiary amides catalyzed by  $\text{La}(\text{CH}_2\text{C}_6\text{H}_4\text{NMe}_2\text{-}o)_3$ .

## 7. $^1\text{H}$ NMR spectra of the products on gram-scale preparation.

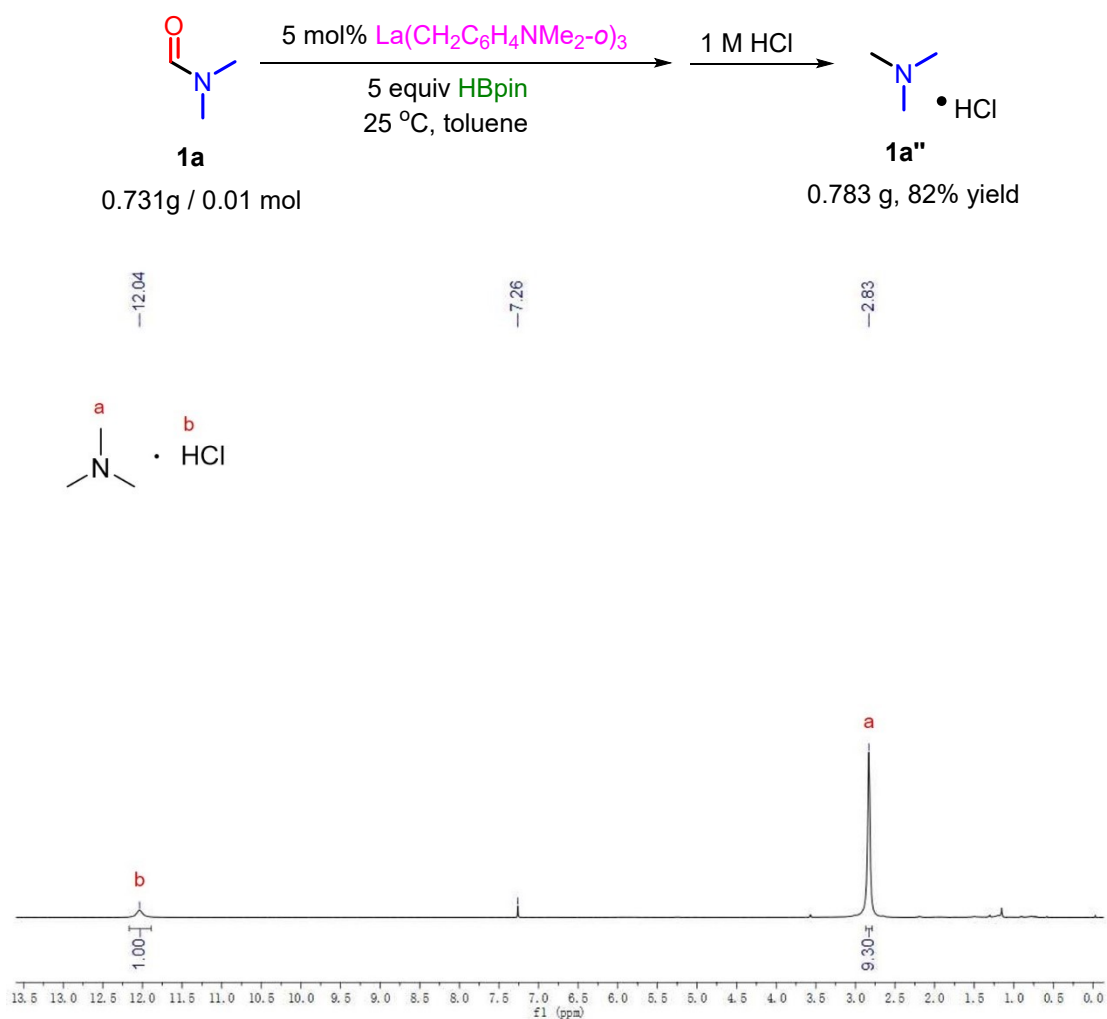

**Fig. S13.**  $^1\text{H}$  NMR spectrum of trimethylamine hydrochloride (400 MHz,  $\text{CDCl}_3$ , 25  $^\circ\text{C}$ , **1a**, Table 1).

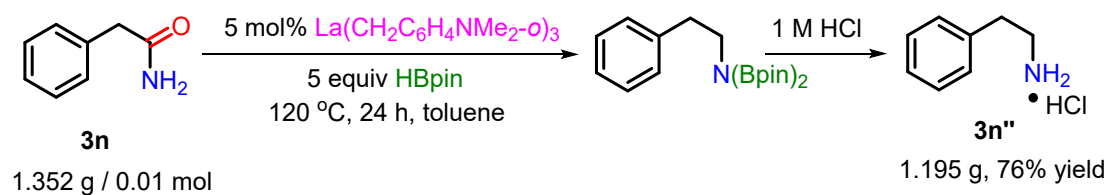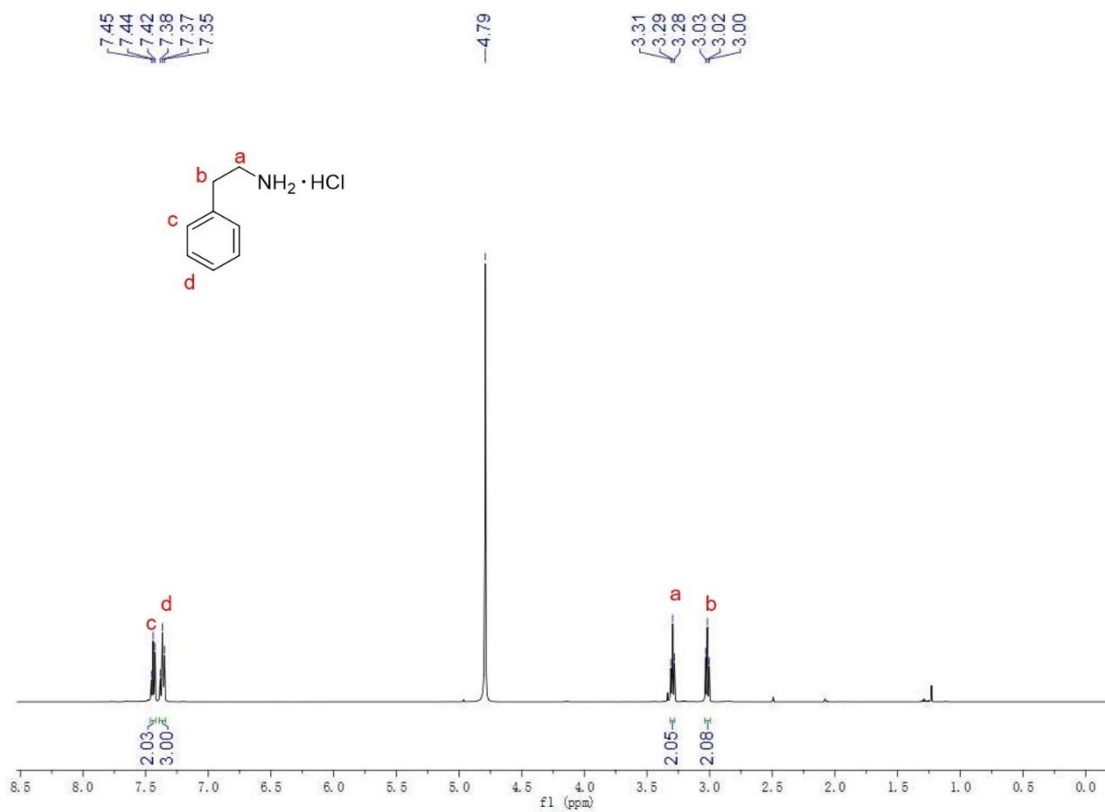

**Fig. S14.**  $^1\text{H}$  NMR spectrum of 2-phenylethan-1-amine hydrochloride (500 MHz,  $\text{D}_2\text{O}$ , 25 °C, **3n**, Table 3).

## 8. $^1\text{H}$ NMR spectroscopy of amines.

All amide reduction products were characterized by  $^1\text{H}$  NMR, and compared with the previous literature.

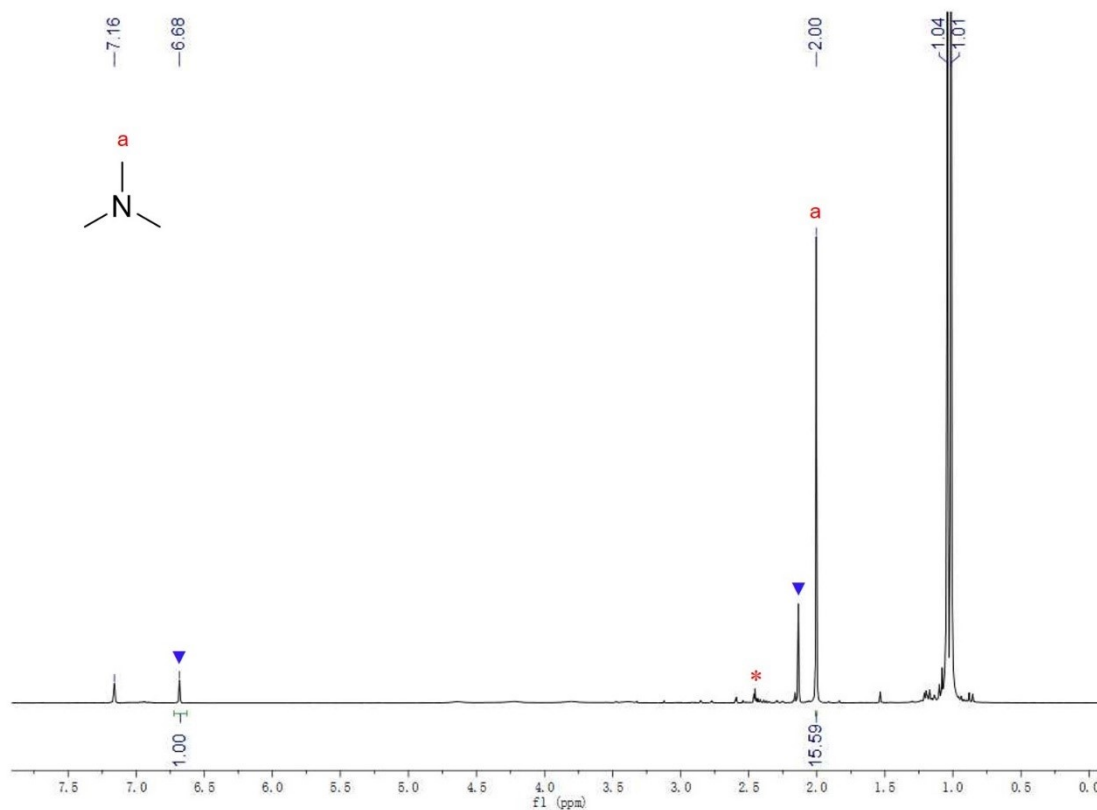

**Fig. S15.** Quantitative  $^1\text{H}$  NMR spectrum of the products of the deoxygenative reduction of N,N-dimethylformamide catalyzed by 5 mol%  $\text{La}(\text{CH}_2\text{C}_6\text{H}_4\text{NMe}_2\text{-}o)_3$  at 25 °C for 1 h. \* = pinBCH $_2$ C $_6$ H $_4$ NMe $_2$ - $o$ , ▼ = 1,3,5-trimethylbenzene (400 MHz,  $\text{C}_6\text{D}_6$ , 25 °C, **1a**, Table 1).

*Trimethylamine.*  $^1\text{H}$  NMR (400 MHz,  $\text{C}_6\text{D}_6$ , ppm):  $\delta$  2.00 (s, 9H, -NCH $_3$ ).

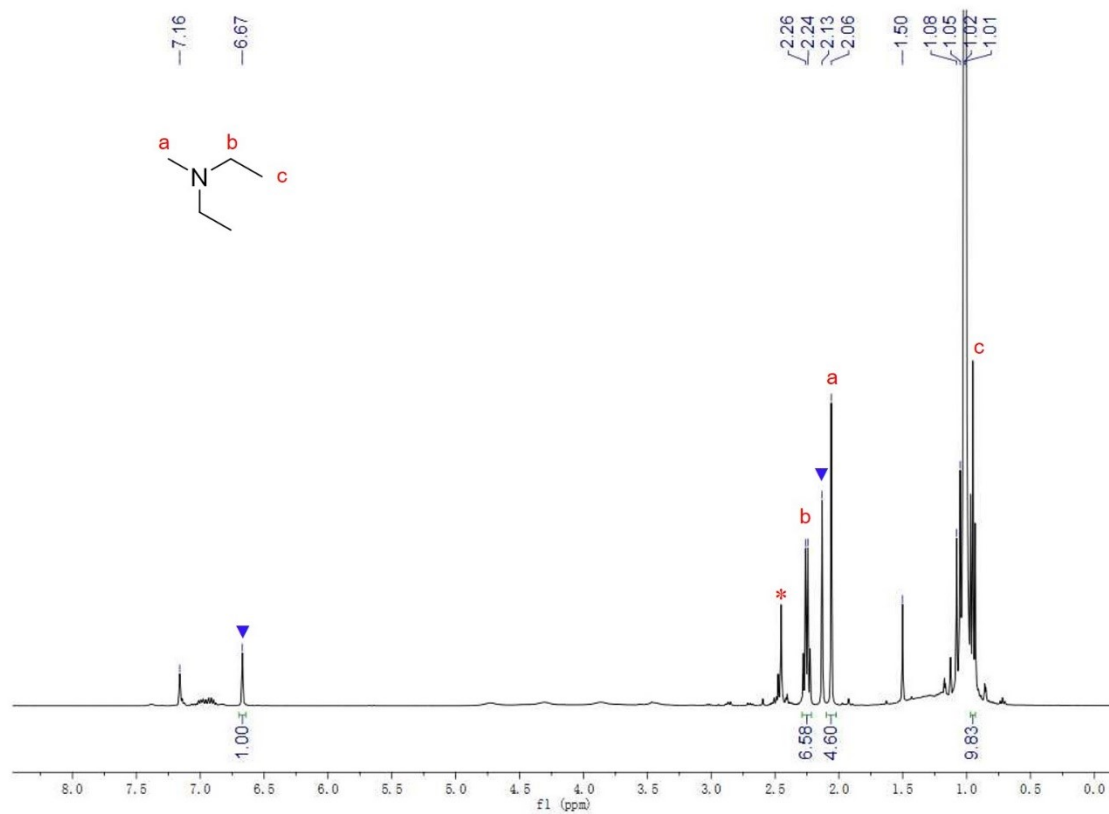

**Fig. S16.** Quantitative <sup>1</sup>H NMR spectrum of the products of the deoxygenative reduction of N,N-diethylformamide catalyzed by 5 mol% La(CH<sub>2</sub>C<sub>6</sub>H<sub>4</sub>NMe<sub>2</sub>-*o*)<sub>3</sub> at 25 °C for 2 h. \* = pinBCH<sub>2</sub>C<sub>6</sub>H<sub>4</sub>NMe<sub>2</sub>-*o*, ▼ = 1,3,5-trimethylbenzene (400 MHz, C<sub>6</sub>D<sub>6</sub>, 25 °C, **1b**, Table 1).

*N,N*-Diethylmethylamine.<sup>2</sup> <sup>1</sup>H NMR (400 MHz, C<sub>6</sub>D<sub>6</sub>, ppm): δ 2.25 (d, *J* = 7.1 Hz, 4H, -N(CH<sub>2</sub>CH<sub>3</sub>)<sub>2</sub>), 2.06 (s, 3H, -NCH<sub>3</sub>), 0.95 (t, *J* = 7.1 Hz, 6H, -N(CH<sub>2</sub>CH<sub>3</sub>)<sub>2</sub>).

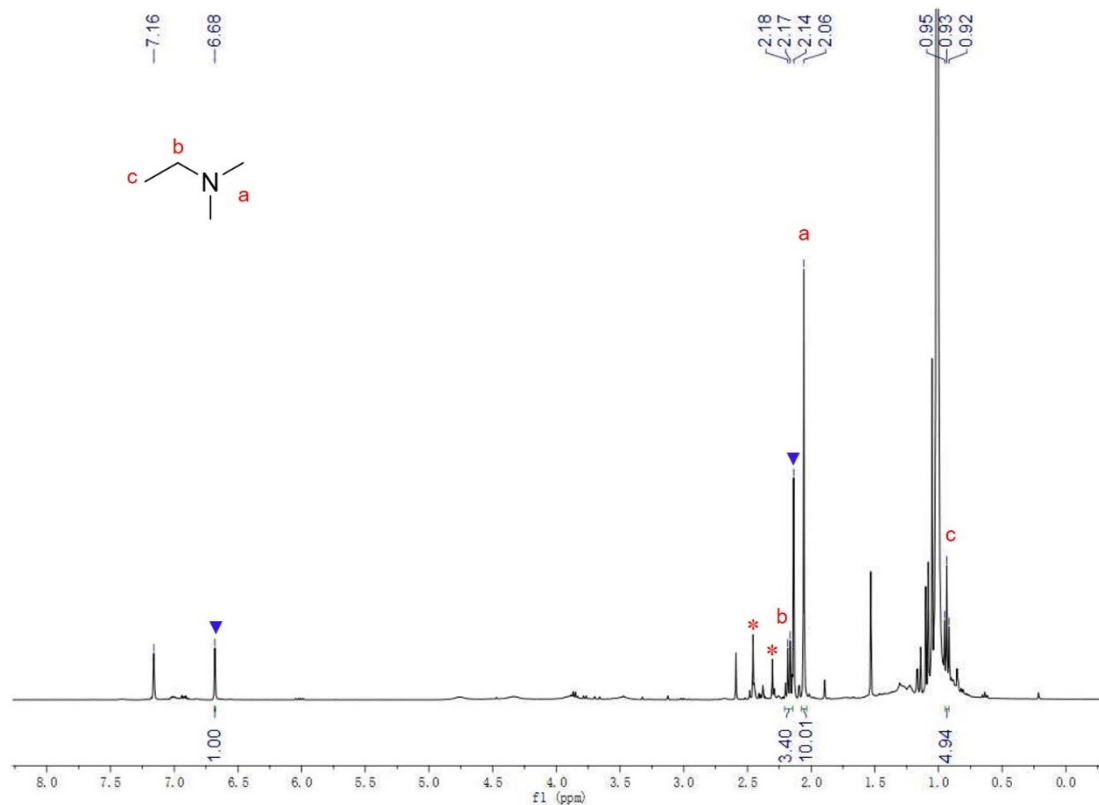

**Fig. S17.** Quantitative <sup>1</sup>H NMR spectrum of the products of the deoxygenative reduction of N,N-dimethylacetamide catalyzed by 5 mol% La(CH<sub>2</sub>C<sub>6</sub>H<sub>4</sub>NMe<sub>2</sub>-*o*)<sub>3</sub> at 25 °C for 2 h. \* = pinBCH<sub>2</sub>C<sub>6</sub>H<sub>4</sub>NMe<sub>2</sub>-*o*, ▼ = 1,3,5-trimethylbenzene (400 MHz, C<sub>6</sub>D<sub>6</sub>, 25 °C, **1c**, Table 1).

*N,N*-Dimethylethanamine.<sup>3</sup> <sup>1</sup>H NMR (400 MHz, C<sub>6</sub>D<sub>6</sub>, ppm): δ 2.17 (d, *J* = 7.3 Hz, 2H, -NCH<sub>2</sub>CH<sub>3</sub>), 2.06 (s, 6H, -N(CH<sub>3</sub>)<sub>2</sub>), 0.93 (t, *J* = 7.2 Hz, 3H, -NCH<sub>2</sub>CH<sub>3</sub>).

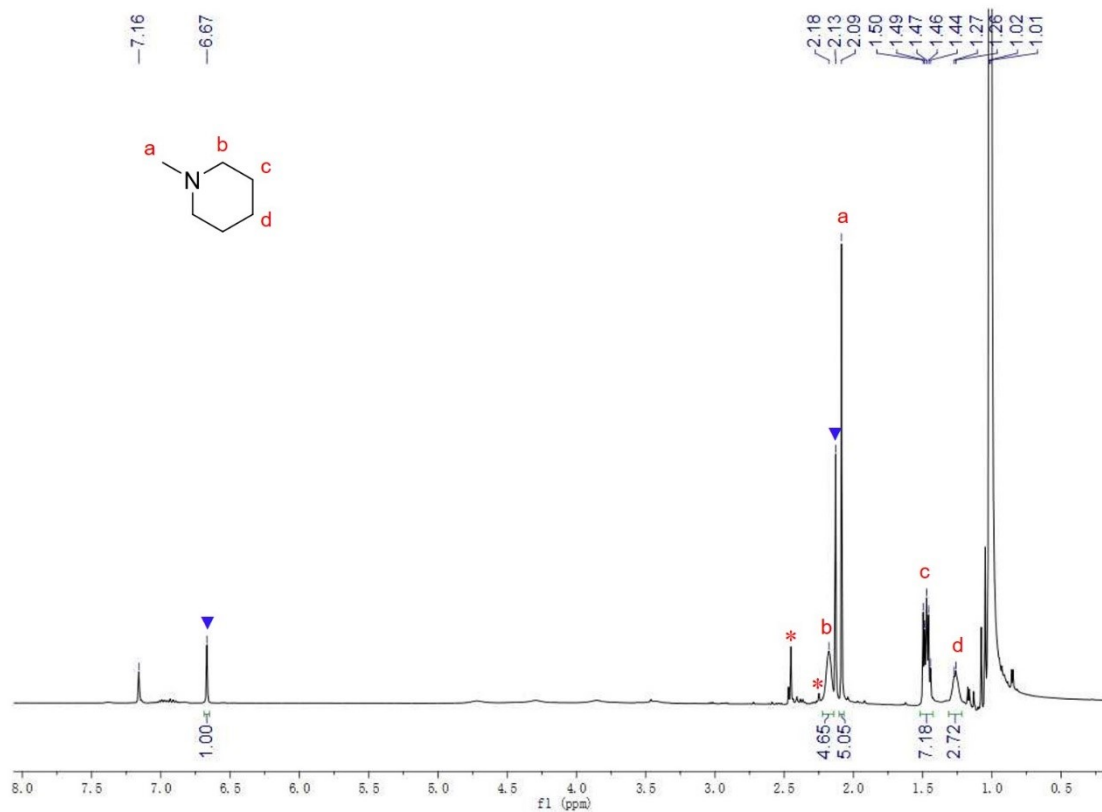

**Fig. S18.** Quantitative <sup>1</sup>H NMR spectrum of the products of the deoxygenative reduction of piperidine-1-carbaldehyde catalyzed by 5 mol% La(CH<sub>2</sub>C<sub>6</sub>H<sub>4</sub>NMe<sub>2</sub>-*o*)<sub>3</sub> at 25 °C for 1 h. \* = pinBCH<sub>2</sub>C<sub>6</sub>H<sub>4</sub>NMe<sub>2</sub>-*o*, ▼ = 1,3,5-trimethylbenzene (400 MHz, C<sub>6</sub>D<sub>6</sub>, 25 °C, **1d**, Table 1).

*1-Methylpiperidine*.<sup>4</sup> <sup>1</sup>H NMR (400 MHz, C<sub>6</sub>D<sub>6</sub>, ppm): δ 2.18 (s, 4H, -NC<sub>5</sub>H<sub>10</sub>), 2.09 (s, 3H, -NCH<sub>3</sub>), 1.51 - 1.43 (m, 4H, -NC<sub>5</sub>H<sub>10</sub>), 1.27 (s, 2H, -NC<sub>5</sub>H<sub>10</sub>).

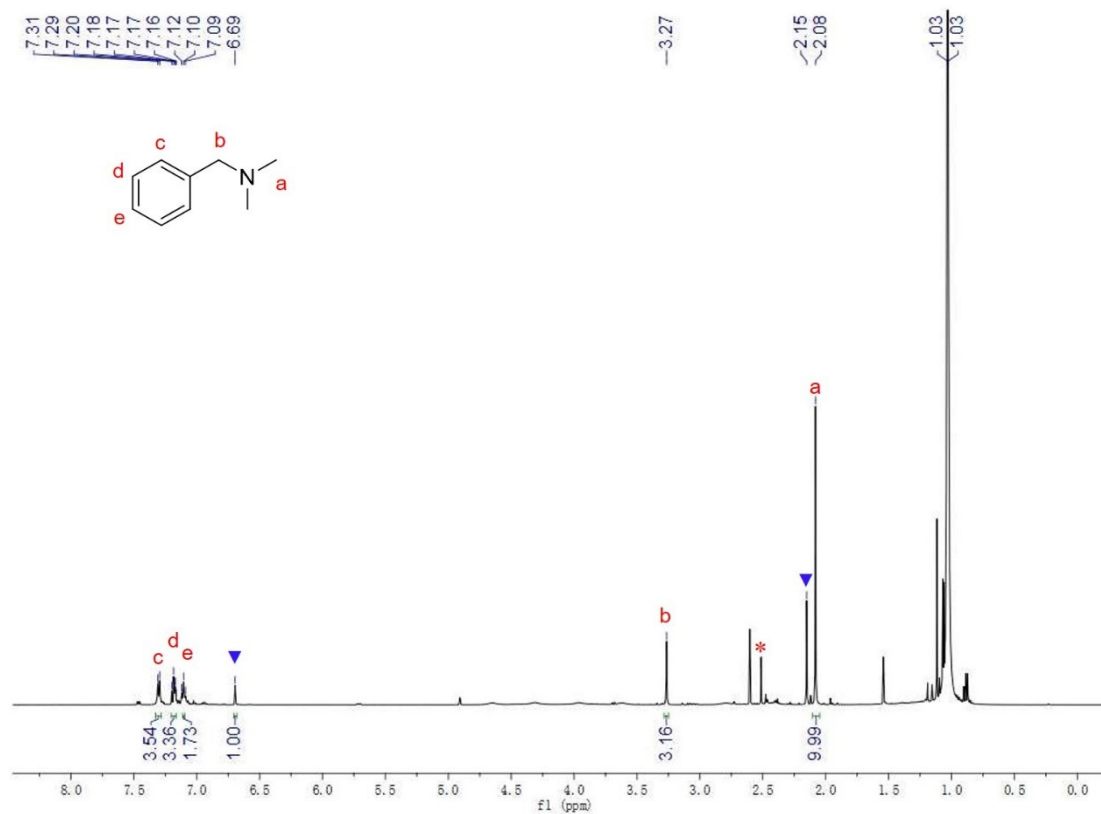

**Fig. S19.** Quantitative <sup>1</sup>H NMR spectrum of the products of the deoxygenative reduction of N,N-dimethylbenzamide catalyzed by 5 mol% La(CH<sub>2</sub>C<sub>6</sub>H<sub>4</sub>NMe<sub>2</sub>-o)<sub>3</sub> at 25 °C for 4 h. \* = pinBCH<sub>2</sub>C<sub>6</sub>H<sub>4</sub>NMe<sub>2</sub>-o, ▼ = 1,3,5-trimethylbenzene (500 MHz, C<sub>6</sub>D<sub>6</sub>, 25 °C, **1e**, Table 1).

*N,N*-Dimethylbenzylamine.<sup>5</sup> <sup>1</sup>H NMR (500 MHz, C<sub>6</sub>D<sub>6</sub>, ppm): δ 7.30 (d, *J* = 7.4 Hz, 2H, -NCH<sub>2</sub>Ph), 7.20 - 7.17 (m, 2H, -NCH<sub>2</sub>Ph), 7.14 - 7.07 (m, 1H, -NCH<sub>2</sub>Ph), 3.27 (s, 2H, -NCH<sub>2</sub>Ph), 2.08 (s, 6H, -N(CH<sub>3</sub>)<sub>2</sub>).



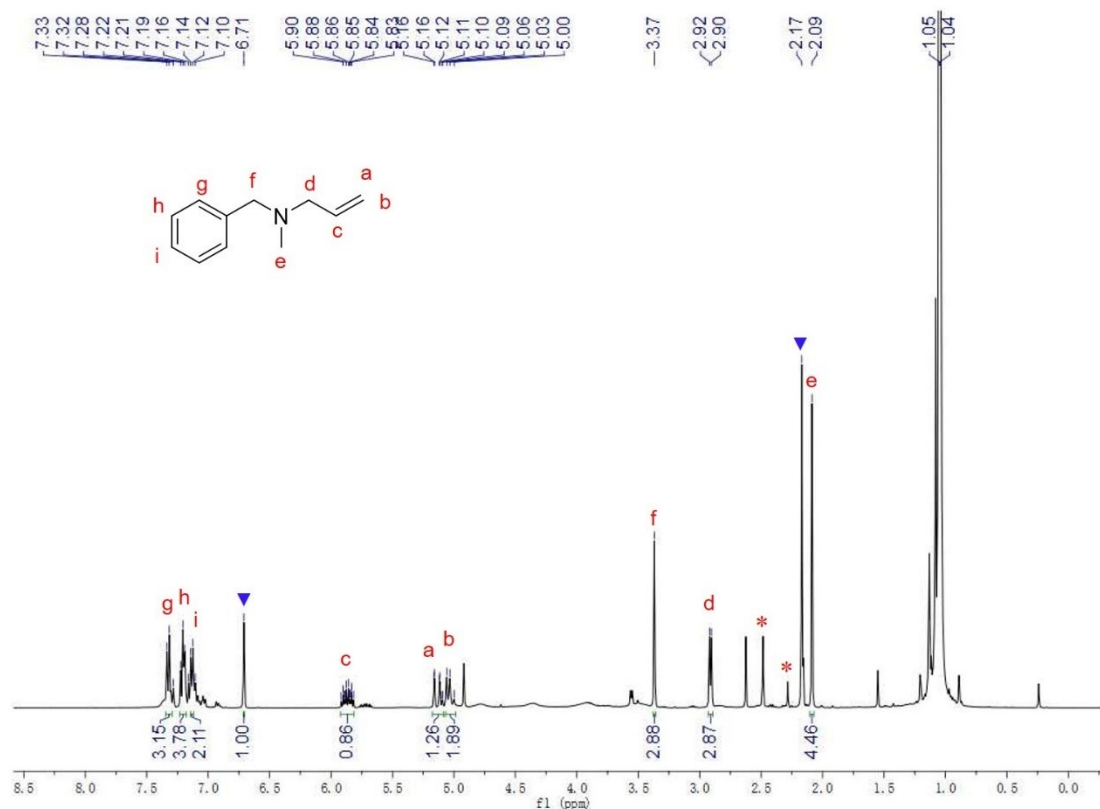

**Fig. S20.** Quantitative  $^1\text{H}$  NMR spectrum of the products of the deoxygenative reduction of *N*-allyl-*N*-methylbenzamide catalyzed by 5 mol%  $\text{La}(\text{CH}_2\text{C}_6\text{H}_4\text{NMe}_2\text{-}o)_3$  at 60  $^\circ\text{C}$  for 1 h. \* =  $\text{pinBCH}_2\text{C}_6\text{H}_4\text{NMe}_2\text{-}o$ ,  $\blacktriangledown$  = 1,3,5-trimethylbenzene (400 MHz,  $\text{C}_6\text{D}_6$ , 25  $^\circ\text{C}$ , **1f**, Table 1).

*N*-Allyl-*N*-Methylbenzylamine.<sup>3</sup>  $^1\text{H}$  NMR (400 MHz,  $\text{C}_6\text{D}_6$ , ppm):  $\delta$  7.33 (d,  $J = 7.5$  Hz, 2H,  $-\text{NCH}_2\text{Ph}$ ), 7.21 (t,  $J = 6.6$  Hz, 2H,  $-\text{NCH}_2\text{Ph}$ ), 7.13 (d,  $J = 7.0$  Hz, 1H,  $-\text{NCH}_2\text{Ph}$ ), 5.87 (ddt,  $J = 16.5, 10.2, 6.3$  Hz, 1H,  $-\text{NCH}_2\text{CHCH}_2$ ), 5.14 (dd,  $J = 17.2$  Hz, 1.6 Hz, 1H,  $-\text{NCH}_2\text{CHCH}_2$ ), 5.05 (dd,  $J = 10.2$  Hz, 0.8 Hz, 1H,  $-\text{NCH}_2\text{CHCH}_2$ ), 3.37 (s, 2H,  $-\text{NCH}_2\text{Ph}$ ), 2.91 (d,  $J = 6.3$  Hz, 2H,  $-\text{NCH}_2\text{CHCH}_2$ ), 2.09 (s, 3H,  $-\text{NCH}_3$ ).

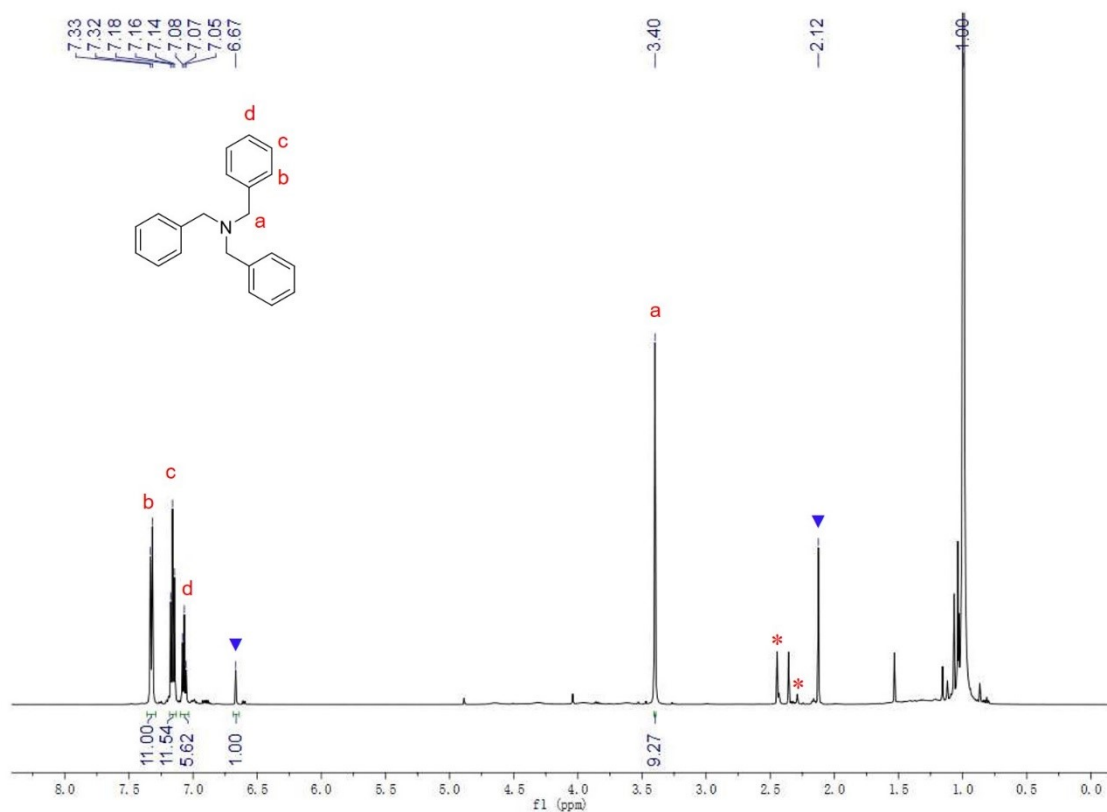

**Fig. S21.** Quantitative  $^1\text{H}$  NMR spectrum of the products of the deoxygenative reduction of N,N-dibenzylbenzamide catalyzed by 5 mol%  $\text{La}(\text{CH}_2\text{C}_6\text{H}_4\text{NMe}_2\text{-}o)_3$  at 80 °C for 24 h. \* = pinBCH $_2\text{C}_6\text{H}_4\text{NMe}_2\text{-}o$ , ▼ = 1,3,5-trimethylbenzene (500 MHz,  $\text{C}_6\text{D}_6$ , 25 °C, **1g**, Table 1).

*Tribenzylamine.*<sup>6</sup>  $^1\text{H}$  NMR (500 MHz,  $\text{C}_6\text{D}_6$ , ppm):  $\delta$  7.33 (d,  $J = 7.6$  Hz, 6H, -NCH $_2\text{Ph}$ ), 7.19 - 7.16 (m, 6H, -NCH $_2\text{Ph}$ ), 7.07 (t,  $J = 7.3$  Hz, 3H, -NCH $_2\text{Ph}$ ), 3.40 (s, 6H, -NCH $_2\text{Ph}$ ).

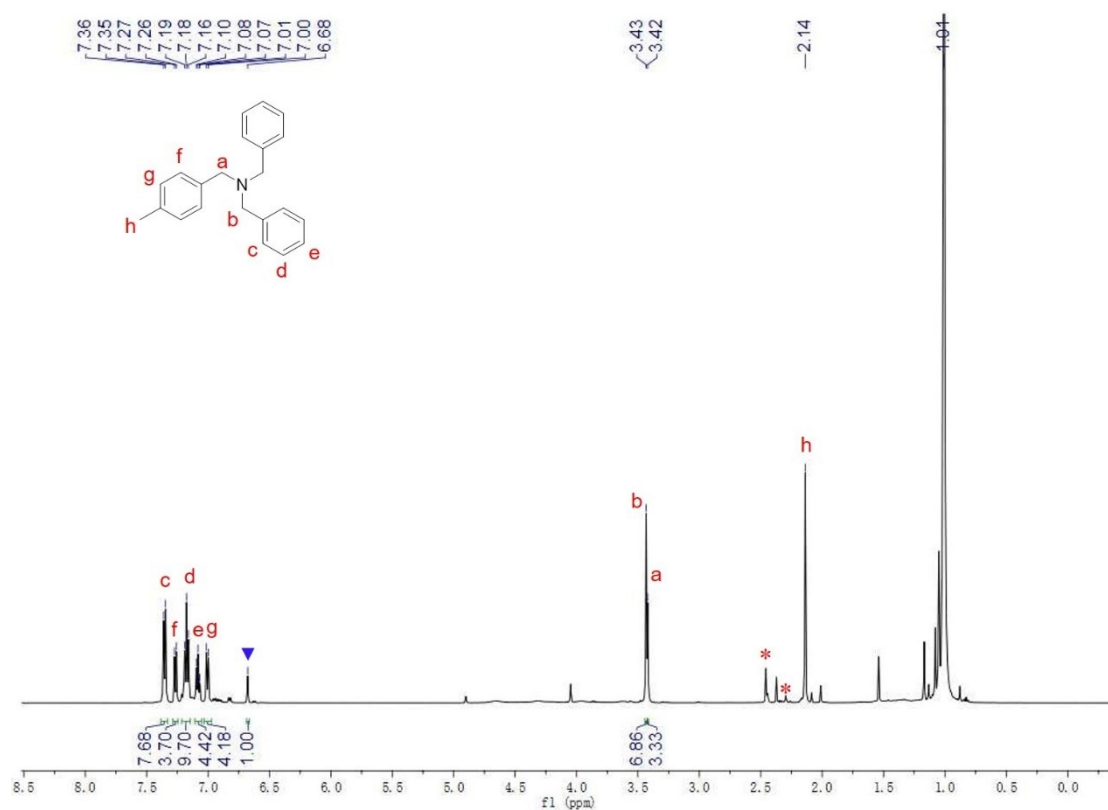

**Fig. S22.** Quantitative <sup>1</sup>H NMR spectrum of the products of the deoxygenative reduction of N,N-dibenzyl-4-methylbenzamide catalyzed by 5 mol% La(CH<sub>2</sub>C<sub>6</sub>H<sub>4</sub>NMe<sub>2</sub>-*o*)<sub>3</sub> at 80 °C for 24 h. \* = pinBCH<sub>2</sub>C<sub>6</sub>H<sub>4</sub>NMe<sub>2</sub>-*o*, ▼ = 1,3,5-trimethylbenzene (500 MHz, C<sub>6</sub>D<sub>6</sub>, 25 °C, **1h**, Table 1).

*N,N*-Dibenzyl(4-Methylbenzyl)Amine.<sup>6</sup> <sup>1</sup>H NMR (500 MHz, C<sub>6</sub>D<sub>6</sub>, ppm): δ 7.35 (d, *J* = 7.6 Hz, 4H, -NCH<sub>2</sub>Ph), 7.27 (d, *J* = 7.8 Hz, 2H, -NCH<sub>2</sub>PhCH<sub>3</sub>), 7.20 - 7.18 (m, 4H, -NCH<sub>2</sub>Ph), 7.08 (t, *J* = 7.3 Hz, 2H, -NCH<sub>2</sub>Ph), 7.01 (d, *J* = 7.7 Hz, 2H, -NCH<sub>2</sub>PhCH<sub>3</sub>), 3.43 (s, 4H, -NCH<sub>2</sub>Ph), 3.42 (s, 2H, -NCH<sub>2</sub>PhCH<sub>3</sub>), 2.14 (s, 3H, -NCH<sub>2</sub>PhCH<sub>3</sub>).

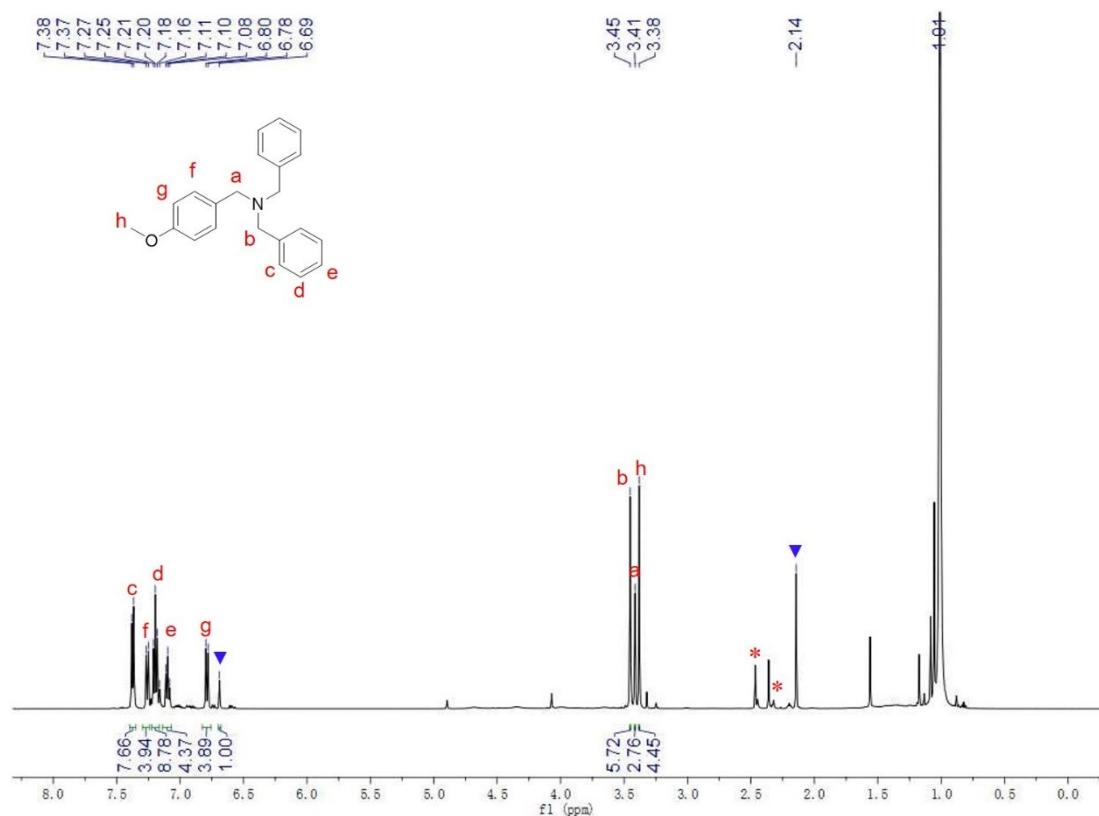

**Fig. S23.** Quantitative  $^1\text{H}$  NMR spectrum of the products of the deoxygenative reduction of *N,N*-dibenzyl-4-methoxybenzamide catalyzed by 5 mol%  $\text{La}(\text{CH}_2\text{C}_6\text{H}_4\text{NMe}_2\text{-}o)_3$  at 80 °C for 24 h. \* = *pinBCH* $_2\text{C}_6\text{H}_4\text{NMe}_2\text{-}o$ , ▼ = 1,3,5-trimethylbenzene (500 MHz,  $\text{C}_6\text{D}_6$ , 25 °C, **1i**, Table 1).

*N,N*-Dibenzyl(4-Methoxybenzyl)Amine.<sup>6</sup>  $^1\text{H}$  NMR (500 MHz,  $\text{C}_6\text{D}_6$ , ppm):  $\delta$  7.37 (d,  $J$  = 7.5 Hz, 4H,  $-\text{NCH}_2\text{Ph}$ ), 7.26 (d,  $J$  = 8.5 Hz, 2H,  $-\text{NCH}_2\text{PhOCH}_3$ ), 7.20 (t,  $J$  = 7.6 Hz, 4H,  $-\text{NCH}_2\text{Ph}$ ), 7.10 (t,  $J$  = 7.3 Hz, 2H,  $-\text{NCH}_2\text{Ph}$ ), 6.79 (d,  $J$  = 8.5 Hz, 2H,  $-\text{NCH}_2\text{PhOCH}_3$ ), 3.45 (s, 4H,  $-\text{NCH}_2\text{Ph}$ ), 3.41 (s, 2H,  $-\text{NCH}_2\text{PhOCH}_3$ ), 3.38 (s, 3H,  $-\text{NCH}_2\text{PhOCH}_3$ ).

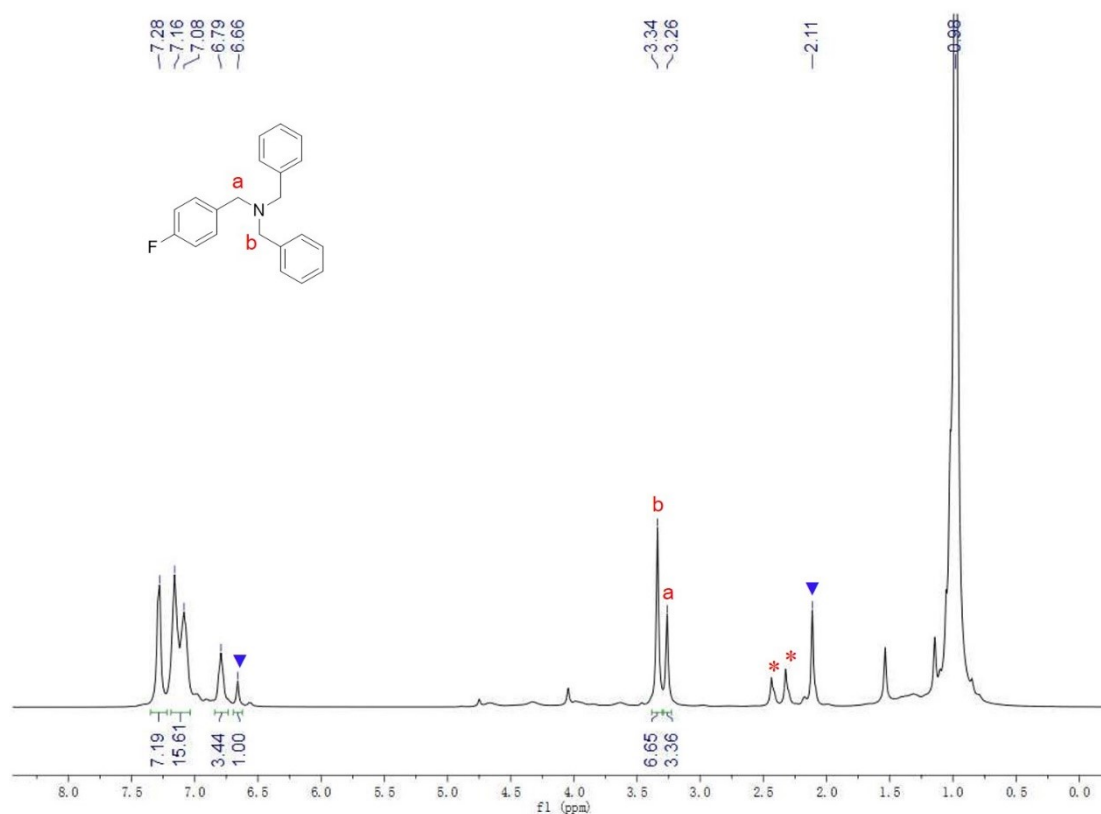

**Fig. S24.** Quantitative  $^1\text{H}$  NMR spectrum of the products of the deoxygenative reduction of *N,N*-dibenzyl-4-fluorobenzamide catalyzed by 5 mol%  $\text{La}(\text{CH}_2\text{C}_6\text{H}_4\text{NMe}_2\text{-}o)_3$  at 80 °C for 24 h. \* = pinBCH $_2$ C $_6$ H $_4$ NMe $_2$ -*o*, ▼ = 1,3,5-trimethylbenzene (500 MHz,  $\text{C}_6\text{D}_6$ , 25 °C, **1j**, Table 1).

*N,N*-Dibenzyl(4-Fluorobenzyl)Amine.<sup>6</sup>  $^1\text{H}$  NMR (500 MHz,  $\text{C}_6\text{D}_6$ , ppm):  $\delta$  7.28 (s, 4H, -NCH $_2$ Ph), 7.12 (d,  $J$  = 37.5 Hz, 8H, -NCH $_2$ Ph), 6.79 (s, 2H, -NCH $_2$ Ph), 3.34 (s, 4H, -NCH $_2$ Ph), 3.26 (s, 2H, -NCH $_2$ PhF).

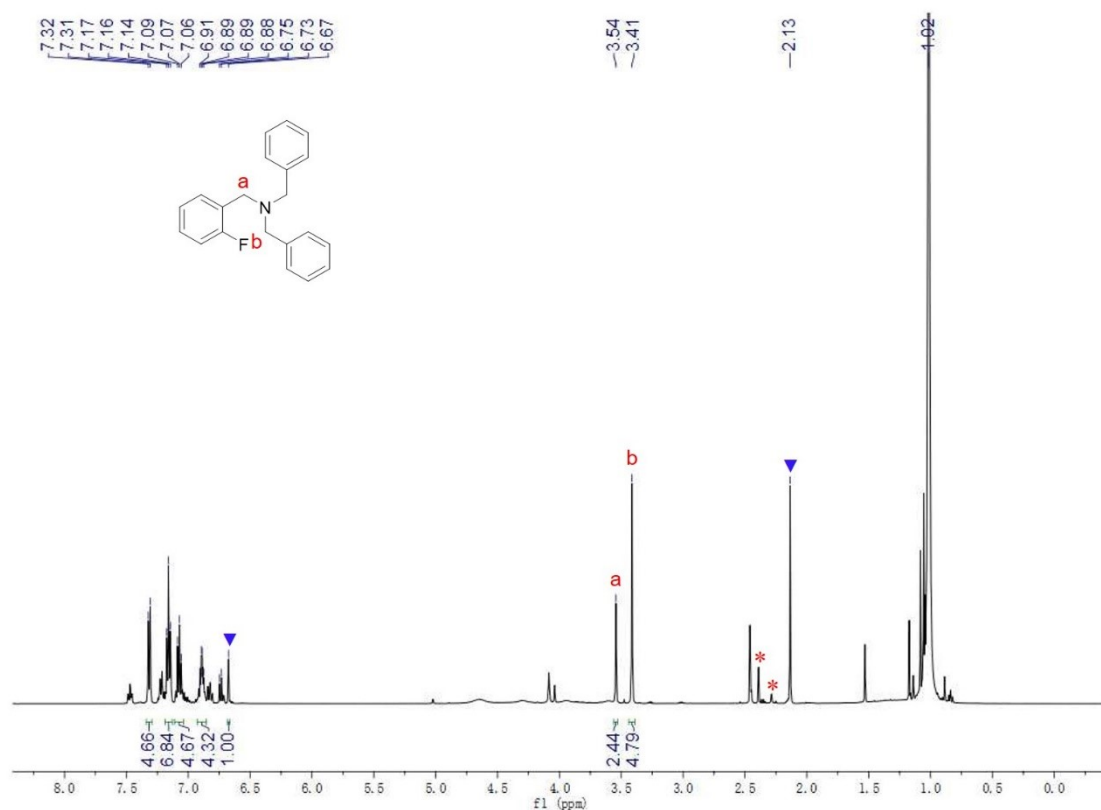

**Fig. S25.** Quantitative  $^1\text{H}$  NMR spectrum of the products of the deoxygenative reduction of *N,N*-dibenzyl-2-fluorobenzamide catalyzed by 5 mol%  $\text{La}(\text{CH}_2\text{C}_6\text{H}_4\text{NMe}_2\text{-}o)_3$  at 80 °C for 24 h. \* = pin $\text{BCH}_2\text{C}_6\text{H}_4\text{NMe}_2\text{-}o$ ,  $\blacktriangledown$  = 1,3,5-trimethylbenzene (500 MHz,  $\text{C}_6\text{D}_6$ , 25 °C, **1k**, Table 1).

*N,N*-Dibenzyl(2-Fluorobenzyl)Amine.<sup>7</sup>  $^1\text{H}$  NMR (500 MHz,  $\text{C}_6\text{D}_6$ , ppm):  $\delta$  7.32 (d,  $J$  = 7.2 Hz, 4H,  $-\text{NCH}_2\text{Ph}$ ), 7.16 (t,  $J$  = 7.5 Hz, 4H,  $-\text{NCH}_2\text{Ph}$ ), 7.07 (t,  $J$  = 7.3 Hz, 4H,  $-\text{NCH}_2\text{Ph}$ ), 6.91 - 6.87 (m, 2H,  $-\text{NCH}_2\text{Ph}$ ), 3.54 (s, 2H,  $-\text{NCH}_2\text{PhF}$ ), 3.41 (s, 4H,  $-\text{NCH}_2\text{Ph}$ ).

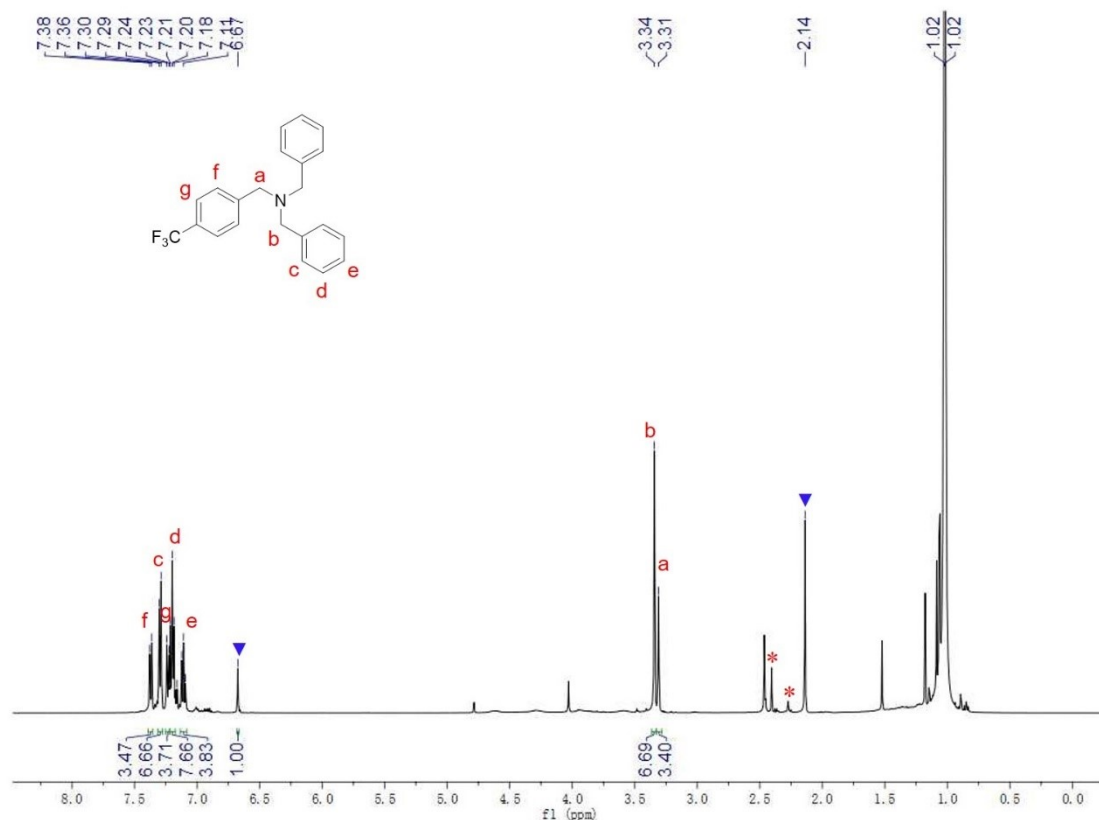

**Fig. S26.** Quantitative  $^1\text{H}$  NMR spectrum of the products of the deoxygenative reduction of *N,N*-dibenzyl-4-(trifluoromethyl)benzamide catalyzed by 5 mol%  $\text{La}(\text{CH}_2\text{C}_6\text{H}_4\text{NMe}_2\text{-}o)_3$  at 80 °C for 24 h. \* = pinBCH $_2$ C $_6$ H $_4$ NMe $_2$ -*o*, ▼ = 1,3,5-trimethylbenzene (500 MHz, C $_6$ D $_6$ , 25 °C, **11**, Table 1).

*N,N*-Dibenzyl(4-Trifluoromethylbenzyl)Amine.<sup>6</sup>  $^1\text{H}$  NMR (500 MHz, C $_6$ D $_6$ , ppm):  $\delta$  7.37 (d,  $J$  = 8.1 Hz, 2H, -NCH $_2$ PhCF $_3$ ), 7.30 (d,  $J$  = 7.3 Hz, 4H, -NCH $_2$ Ph), 7.23 (d,  $J$  = 8.0 Hz, 2H, -NCH $_2$ PhCF $_3$ ), 7.20 (t,  $J$  = 7.6 Hz, 4H, -NCH $_2$ Ph), 7.11 (t,  $J$  = 7.4 Hz, 2H, -NCH $_2$ Ph), 3.34 (s, 4H, -NCH $_2$ Ph), 3.31 (s, 2H, -NCH $_2$ PhCF $_3$ ).

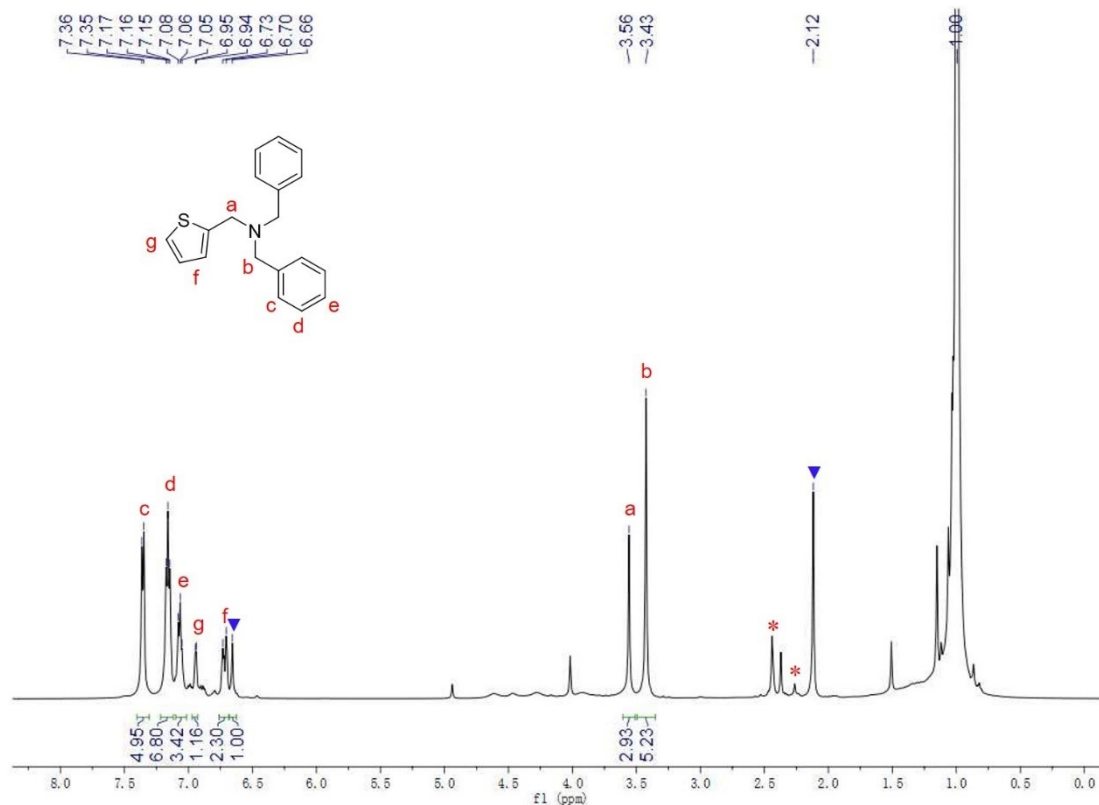

**Fig. S27.** Quantitative  $^1\text{H}$  NMR spectrum of the products of the deoxygenative reduction of *N,N*-dibenzylthiophene-2-carboxamide catalyzed by 5 mol%  $\text{La}(\text{CH}_2\text{C}_6\text{H}_4\text{NMe}_2\text{-}o)_3$  at 80 °C for 24 h. \* = *pinBCH* $_2\text{C}_6\text{H}_4\text{NMe}_2\text{-}o$ ,  $\blacktriangledown$  = 1,3,5-trimethylbenzene (500 MHz,  $\text{C}_6\text{D}_6$ , 25 °C, **1m**, Table 1).

*N,N*-Dibenzyl-2-Thiophenemethylamine.<sup>6</sup>  $^1\text{H}$  NMR (500 MHz,  $\text{C}_6\text{D}_6$ , ppm):  $\delta$  7.36 (d,  $J = 7.3$  Hz, 4H,  $-\text{NCH}_2\text{Ph}$ ), 7.19 - 7.12 (m, 4H,  $-\text{NCH}_2\text{Ph}$ ), 7.06 (t,  $J = 7.0$  Hz, 2H,  $-\text{NCH}_2\text{Ph}$ ), 6.94 (d,  $J = 4.5$  Hz, 1H,  $-\text{NCH}_2\text{C}_4\text{H}_3\text{S}$ ), 6.72 (d,  $J = 13.1$  Hz, 2H,  $-\text{NCH}_2\text{C}_4\text{H}_3\text{S}$ ), 3.56 (s, 2H,  $-\text{NCH}_2\text{C}_4\text{H}_3\text{S}$ ), 3.43 (s, 4H,  $-\text{NCH}_2\text{Ph}$ ).



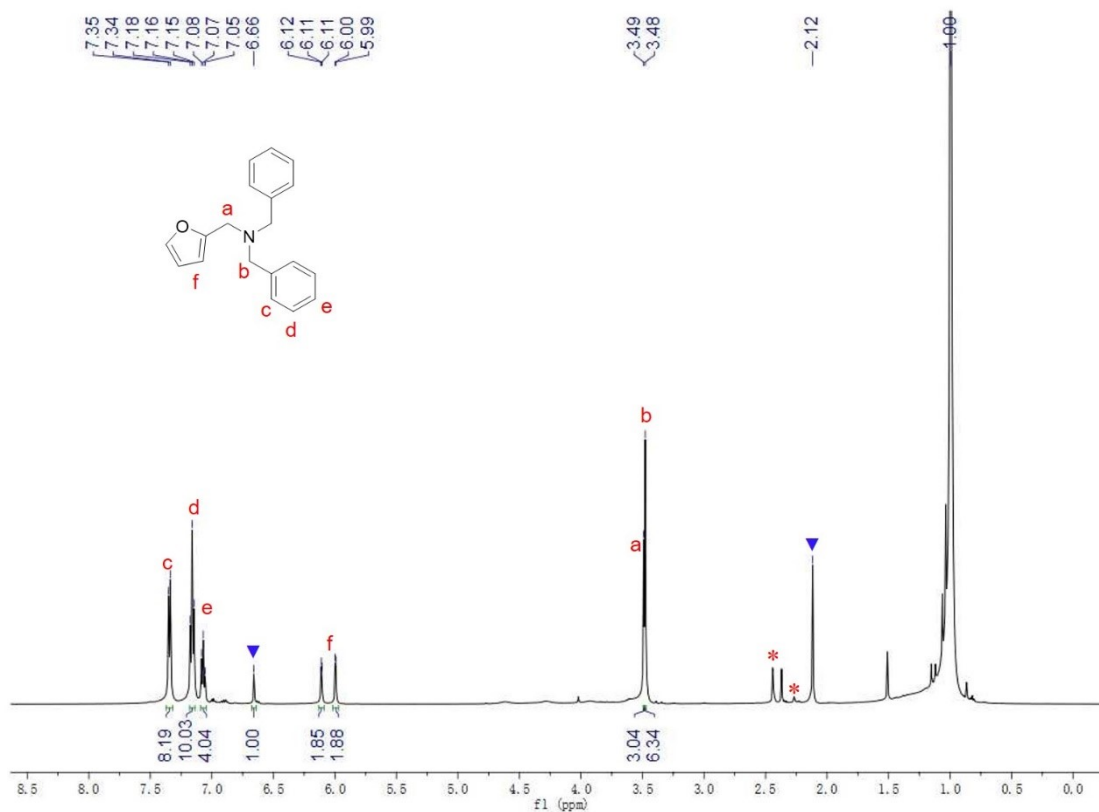

**Fig. S28.** Quantitative  $^1\text{H}$  NMR spectrum of the products of the deoxygenative reduction of *N,N*-dibenzylfuran-2-carboxamide catalyzed by 5 mol%  $\text{La}(\text{CH}_2\text{C}_6\text{H}_4\text{NMe}_2\text{-}o)_3$  at 80 °C for 24 h. \* = *pinBCH}\_2\text{C}\_6\text{H}\_4\text{NMe}\_2\text{-}o,  $\blacktriangledown$  = 1,3,5-trimethylbenzene (500 MHz,  $\text{C}_6\text{D}_6$ , 25 °C, **1n**, Table 1).*

*N,N*-Dibenzyl-2-Furanmethylamine.<sup>6</sup>  $^1\text{H}$  NMR (500 MHz,  $\text{C}_6\text{D}_6$ , ppm):  $\delta$  7.34 (d,  $J$  = 7.4 Hz, 4H,  $-\text{NCH}_2\text{Ph}$ ), 7.16 (t,  $J$  = 7.6 Hz, 4H,  $-\text{NCH}_2\text{Ph}$ ), 7.07 (t,  $J$  = 7.3 Hz, 2H,  $-\text{NCH}_2\text{Ph}$ ), 6.14 - 6.08 (m, 1H,  $-\text{NCH}_2\text{C}_4\text{H}_3\text{O}$ ), 6.00 (d,  $J$  = 3.0 Hz, 1H,  $-\text{NCH}_2\text{C}_4\text{H}_3\text{O}$ ), 3.49 (s, 2H,  $-\text{NCH}_2\text{C}_4\text{H}_3\text{O}$ ), 3.48 (s, 4H,  $-\text{NCH}_2\text{Ph}$ ).

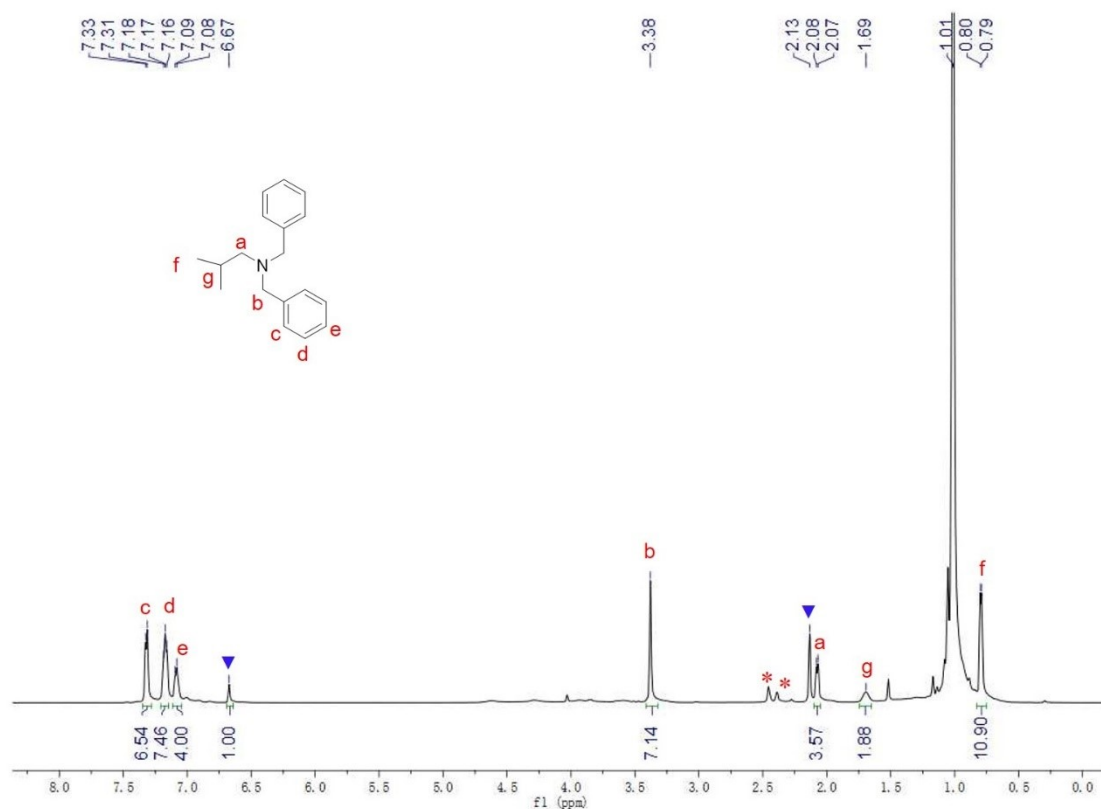

**Fig. S29.** Quantitative  $^1\text{H}$  NMR spectrum of the products of the deoxygenative reduction of *N,N*-dibenzylisobutyramide catalyzed by 5 mol%  $\text{La}(\text{CH}_2\text{C}_6\text{H}_4\text{NMe}_2\text{-}o)_3$  at 80 °C for 24 h. \* = pinBCH<sub>2</sub>C<sub>6</sub>H<sub>4</sub>NMe<sub>2</sub>-*o*, ▼ = 1,3,5-trimethylbenzene (500 MHz, C<sub>6</sub>D<sub>6</sub>, 25 °C, **1o**, Table 1).

*N,N*-Dibenzyl-2-Methylpropan-1-Amine.<sup>8</sup>  $^1\text{H}$  NMR (500 MHz, C<sub>6</sub>D<sub>6</sub>, ppm):  $\delta$  7.32 (d,  $J$  = 6.8 Hz, 4H, -NCH<sub>2</sub>Ph), 7.22 - 7.15 (m, 4H, -NCH<sub>2</sub>Ph), 7.09 (d,  $J$  = 6.1 Hz, 2H, -NCH<sub>2</sub>Ph), 3.38 (s, 4H, -NCH<sub>2</sub>Ph), 2.07 (d,  $J$  = 5.4 Hz, 2H, -NCH<sub>2</sub>CH(CH<sub>3</sub>)<sub>2</sub>), 1.69 (s, 1H, -NCH<sub>2</sub>CH(CH<sub>3</sub>)<sub>2</sub>), 0.79 (d,  $J$  = 4.0 Hz, 6H, -NCH<sub>2</sub>CH(CH<sub>3</sub>)<sub>2</sub>).

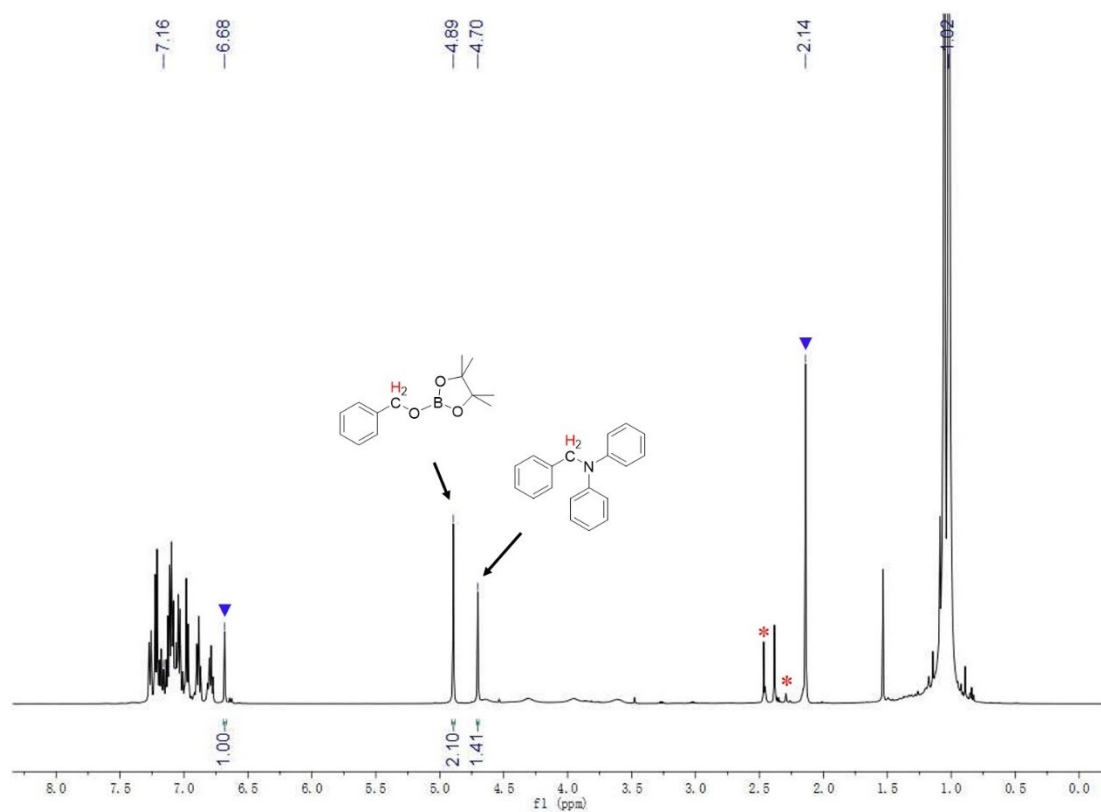

**Fig. S30.** Quantitative <sup>1</sup>H NMR spectrum of the products of the deoxygenative reduction of N,N-diphenylbenzamide catalyzed by 5 mol% La(CH<sub>2</sub>C<sub>6</sub>H<sub>4</sub>NMe<sub>2</sub>-o)<sub>3</sub> at 80 °C for 24 h. \* = pinBCH<sub>2</sub>C<sub>6</sub>H<sub>4</sub>NMe<sub>2</sub>-o, ▼ = 1,3,5-trimethylbenzene (500 MHz, C<sub>6</sub>D<sub>6</sub>, 25 °C, **1p**, Table 1).

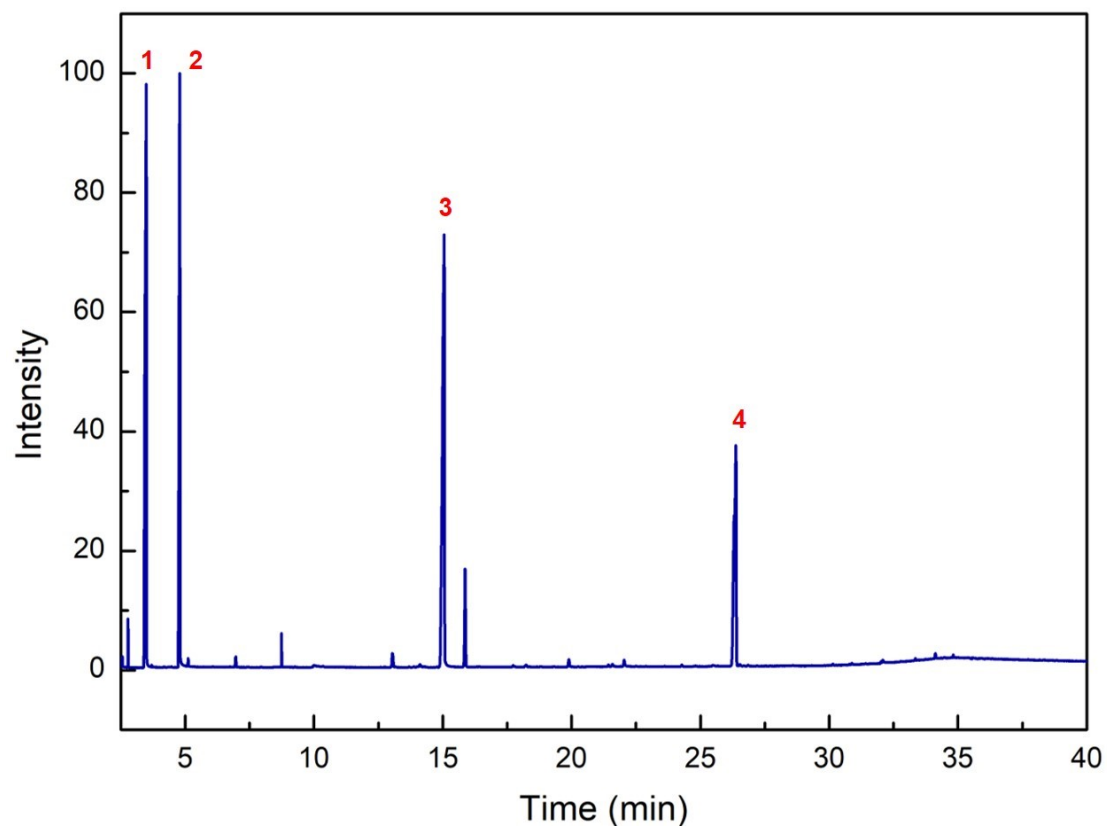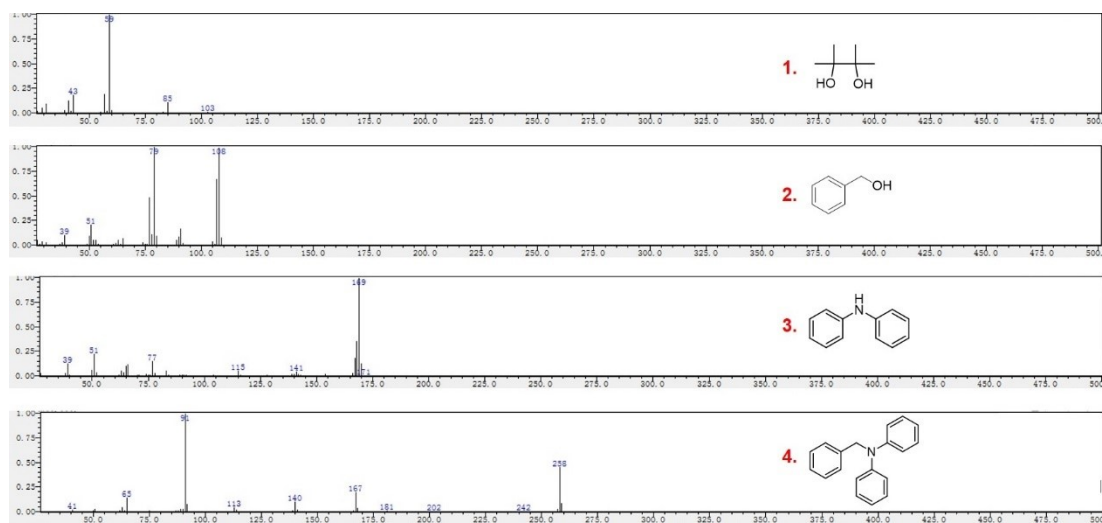

**Fig. S31.** GC-MS of 2,3-dimethylbutane-2,3-diol, phenylmethanol, diphenylamine and N-benzyl-N-phenylaniline.

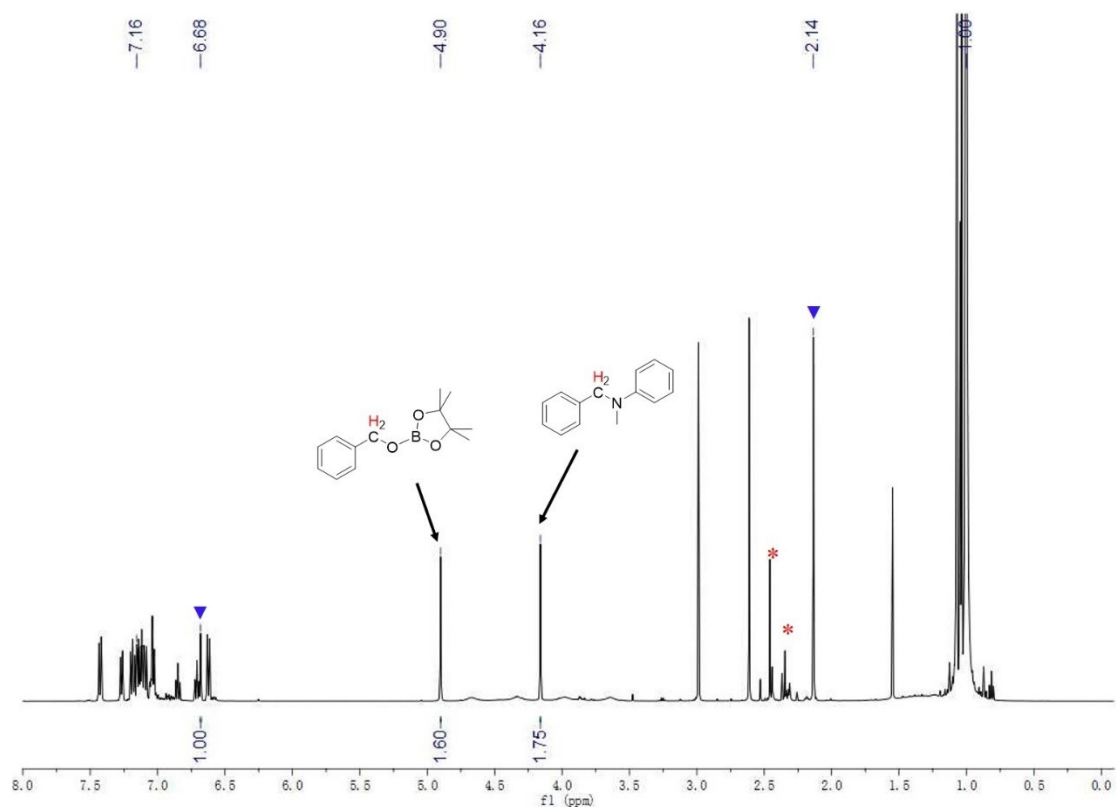

**Fig. S32.** Quantitative  $^1\text{H}$  NMR spectrum of the products of the deoxygenative reduction of N-methyl-N-phenylbenzamide catalyzed by 5 mol%  $\text{La}(\text{CH}_2\text{C}_6\text{H}_4\text{NMe}_2\text{-}o)_3$  at 80 °C for 24 h. \* = pinBCH $_2$ C $_6$ H $_4$ NMe $_2$ - $o$ , ▼ = 1,3,5-trimethylbenzene (500 MHz, C $_6$ D $_6$ , 25 °C, **1q**, Table 1).

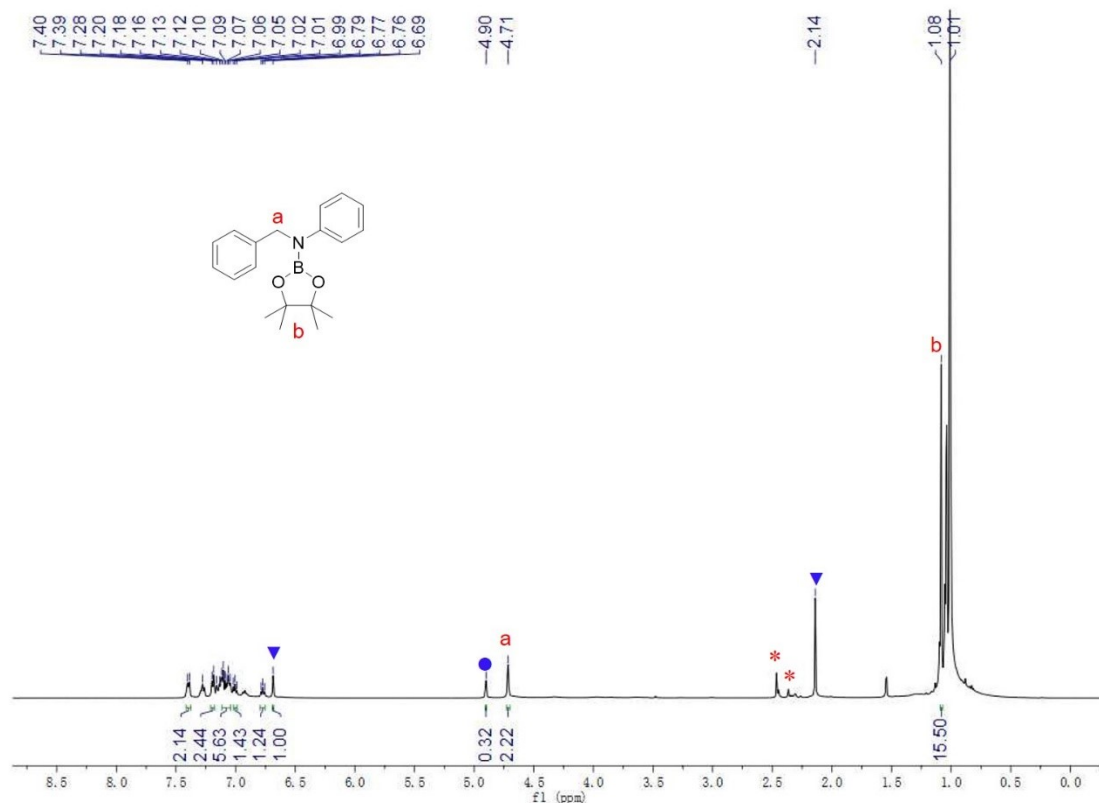

**Fig. S33.** Quantitative <sup>1</sup>H NMR spectrum of the products of the deoxygenative reduction of *N*-phenylbenzamide catalyzed by 5 mol% La(CH<sub>2</sub>C<sub>6</sub>H<sub>4</sub>NMe<sub>2</sub>-*o*)<sub>3</sub> at 120 °C for 24 h. \* = pinBCH<sub>2</sub>C<sub>6</sub>H<sub>4</sub>NMe<sub>2</sub>-*o*, ▼ = 1,3,5-trimethylbenzene, ● = pinBOCH<sub>2</sub>C<sub>6</sub>H<sub>5</sub> (400 MHz, C<sub>6</sub>D<sub>6</sub>, 25 °C, **2a**, Table 2).

*N*-Benzyl-*N*-Phenyl-4,4,5,5-Tetramethyl-1,3,2-Dioxaborolan-2-Amine.<sup>9</sup> <sup>1</sup>H NMR (500 MHz, C<sub>6</sub>D<sub>6</sub>, ppm): δ 7.40 (d, *J* = 8.7 Hz, 2H, -*Ph*), 7.19 (d, *J* = 7.3 Hz, 2H, -*Ph*), 7.15 - 7.03 (m, 4H, -*Ph*), 7.00 (t, *J* = 7.3 Hz, 1H, -*Ph*), 6.77 (t, *J* = 7.3 Hz, 1H, -*Ph*), 4.71 (s, 2H, -NCH<sub>2</sub>Ph), 1.08 (s, 12H, -NBpin).

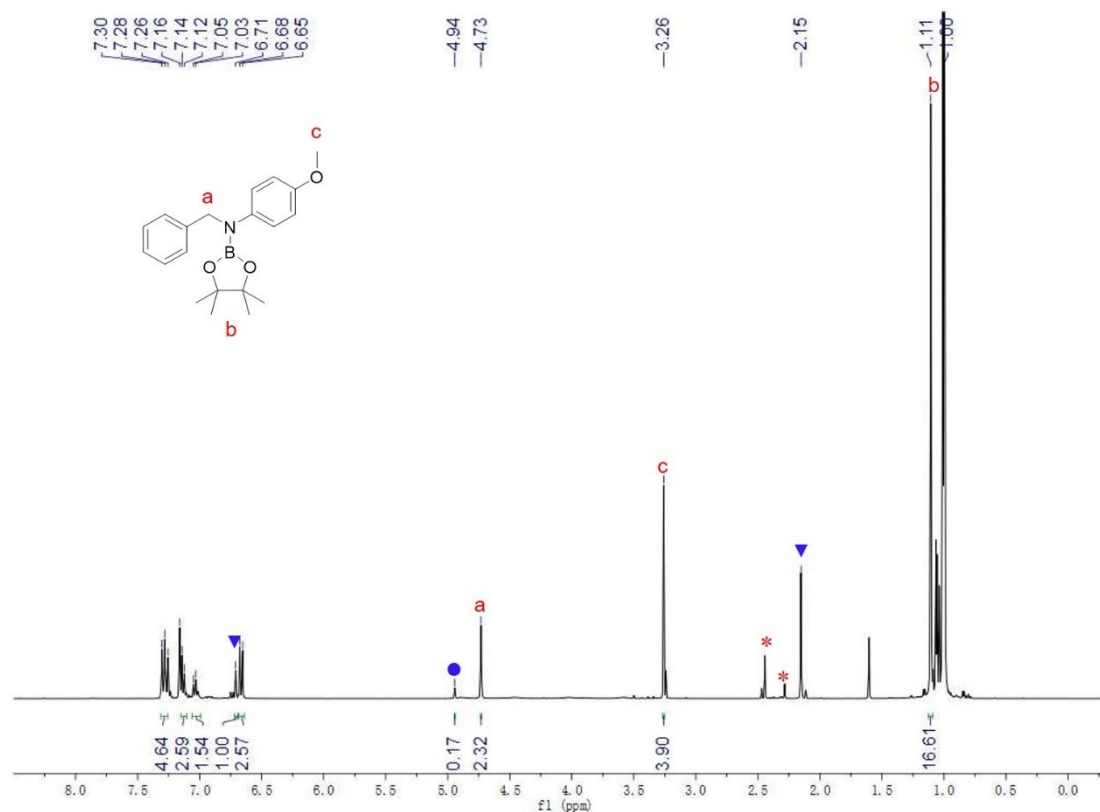

**Fig. S34.** Quantitative  $^1\text{H}$  NMR spectrum of the products of the deoxygenative reduction of *N*-(4-methoxyphenyl)benzamide catalyzed by 5 mol%  $\text{La}(\text{CH}_2\text{C}_6\text{H}_4\text{NMe}_2\text{-}o)_3$  at 120 °C for 24 h. \* =  $\text{pinBCH}_2\text{C}_6\text{H}_4\text{NMe}_2\text{-}o$ ,  $\blacktriangledown$  = 1,3,5-trimethylbenzene,  $\bullet$  =  $\text{pinBOCH}_2\text{C}_6\text{H}_5$  (400 MHz,  $\text{C}_6\text{D}_6$ , 25 °C, **2b**, Table 2).

*N*-Benzyl-*N*-(4-Methoxyphenyl)-4,4,5,5-Tetramethyl-1,3,2-Dioxaborolan-2-Amine.<sup>9</sup>

$^1\text{H}$  NMR (400 MHz,  $\text{C}_6\text{D}_6$ , ppm):  $\delta$  7.32 - 7.24 (m, 4H, -Ph), 7.13 (d,  $J = 7.7$  Hz, 2H, -Ph), 7.03 (t,  $J = 7.4$  Hz, 1H, -Ph), 6.66 (d,  $J = 9.1$  Hz, 2H, -Ph), 4.73 (s, 2H, - $\text{NCH}_2\text{Ph}$ ), 3.26 (s, 3H, - $\text{NPhOCH}_3$ ), 1.11 (s, 12H, -NBpin).

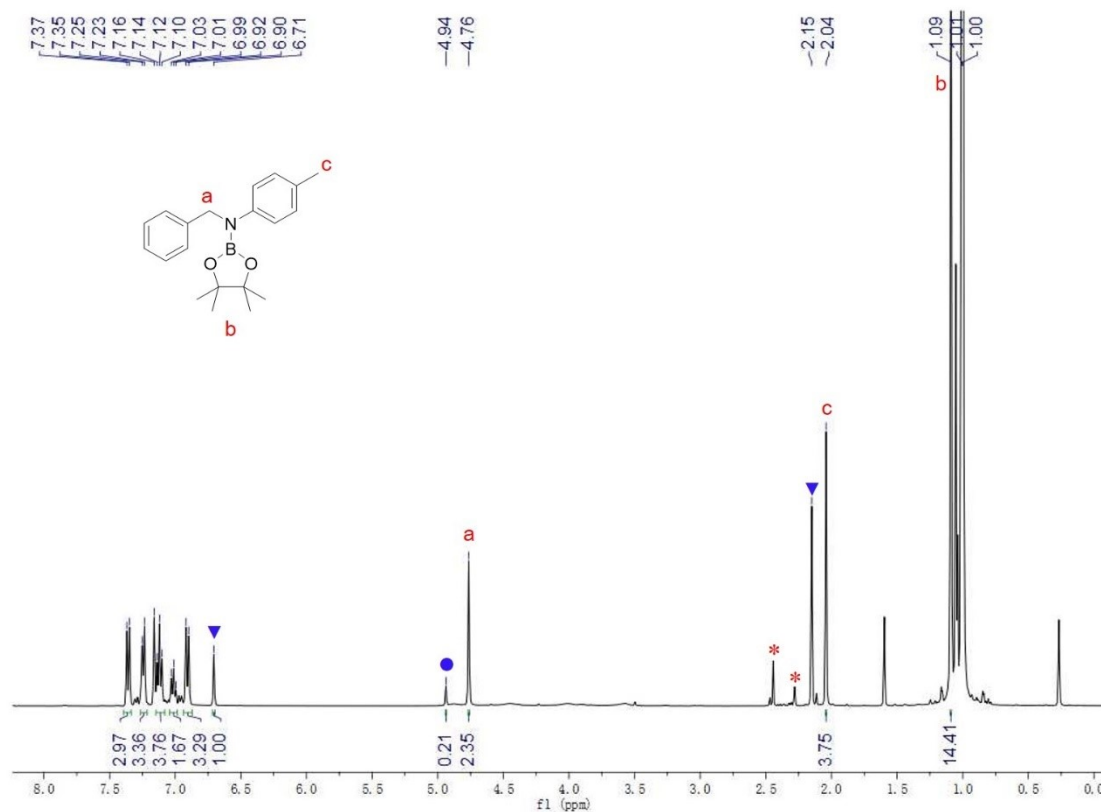

**Fig. S35.** Quantitative <sup>1</sup>H NMR spectrum of the products of the deoxygenative reduction of *N*-(*p*-tolyl)benzamide catalyzed by 5 mol% La(CH<sub>2</sub>C<sub>6</sub>H<sub>4</sub>NMe<sub>2</sub>-*o*)<sub>3</sub> at 120 °C for 24 h. \* = pinBCH<sub>2</sub>C<sub>6</sub>H<sub>4</sub>NMe<sub>2</sub>-*o*, ▼ = 1,3,5-trimethylbenzene, ● = pinBOCH<sub>2</sub>C<sub>6</sub>H<sub>5</sub> (400 MHz, C<sub>6</sub>D<sub>6</sub>, 25 °C, **2c**, Table 2).

*N*-Benzyl-*N*-(*p*-Tolyl)-4,4,5,5-Tetramethyl-1,3,2-Dioxaborolan-2-Amine.<sup>10</sup> <sup>1</sup>H NMR (400 MHz, C<sub>6</sub>D<sub>6</sub>, ppm): δ 7.36 (d, *J* = 8.4 Hz, 2H, -*Ph*), 7.24 (d, *J* = 7.4 Hz, 2H, -*Ph*), 7.12 (t, *J* = 7.6 Hz, 2H, -*Ph*), 7.01 (t, *J* = 7.3 Hz, 1H, -*Ph*), 6.91 (d, *J* = 8.2 Hz, 2H, -*Ph*), 4.76 (s, 2H, -NCH<sub>2</sub>Ph), 2.04 (s, 3H, -NPhCH<sub>3</sub>), 1.09 (s, 12H, -NBpin).



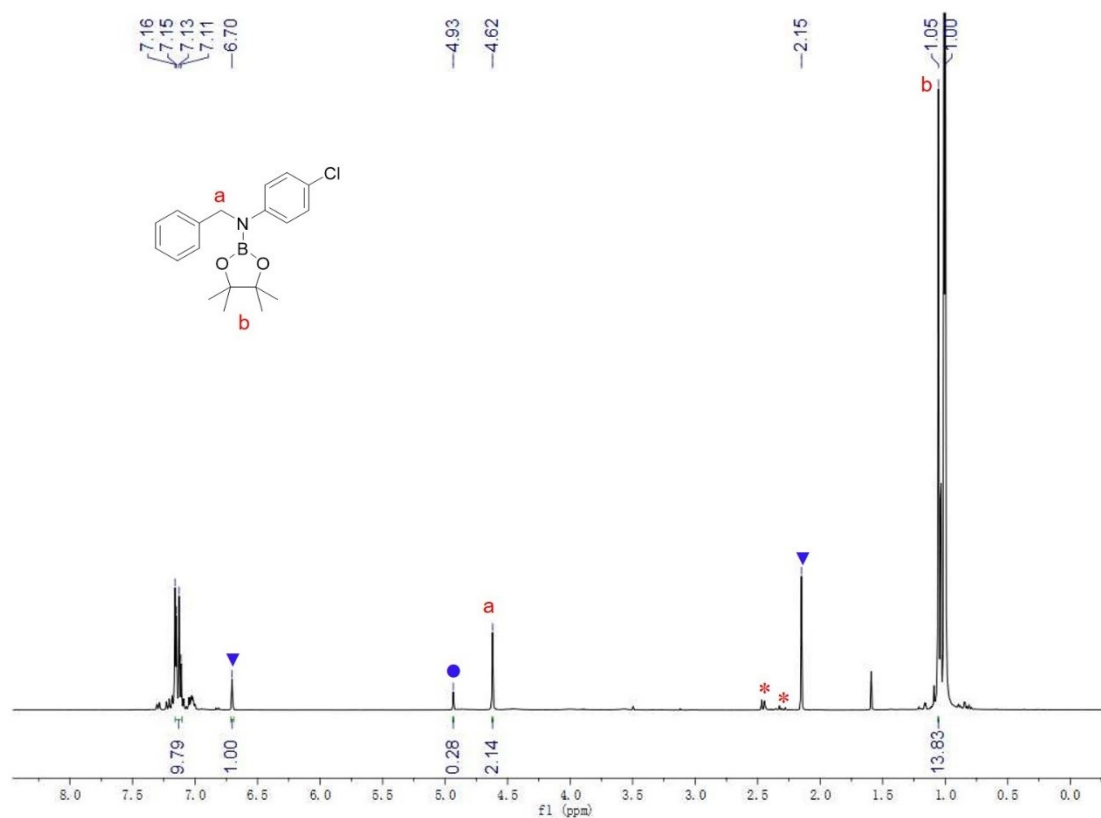

**Fig. S36.** Quantitative  $^1\text{H}$  NMR spectrum of the products of the deoxygenative reduction of *N*-(4-chlorophenyl)benzamide catalyzed by 5 mol%  $\text{La}(\text{CH}_2\text{C}_6\text{H}_4\text{NMe}_2\text{-}o)_3$  at 120  $^\circ\text{C}$  for 24 h. \* =  $\text{pinBCH}_2\text{C}_6\text{H}_4\text{NMe}_2\text{-}o$ , ▼ = 1,3,5-trimethylbenzene, ● =  $\text{pinBOCH}_2\text{C}_6\text{H}_5$  (400 MHz,  $\text{C}_6\text{D}_6$ , 25  $^\circ\text{C}$ , **2d**, Table 2).

*N*-Benzyl-*N*-(4-Chlorophenyl)-4,4,5,5-Tetramethyl-1,3,2-Dioxaborolan-2-Amine.<sup>10</sup>  $^1\text{H}$  NMR (400 MHz,  $\text{C}_6\text{D}_6$ , ppm):  $\delta$  7.15 -7.10 (m, 9H, -*Ph*), 4.62 (s, 2H, - $\text{NCH}_2\text{Ph}$ ), 1.05 (s, 12H, -NBpin).

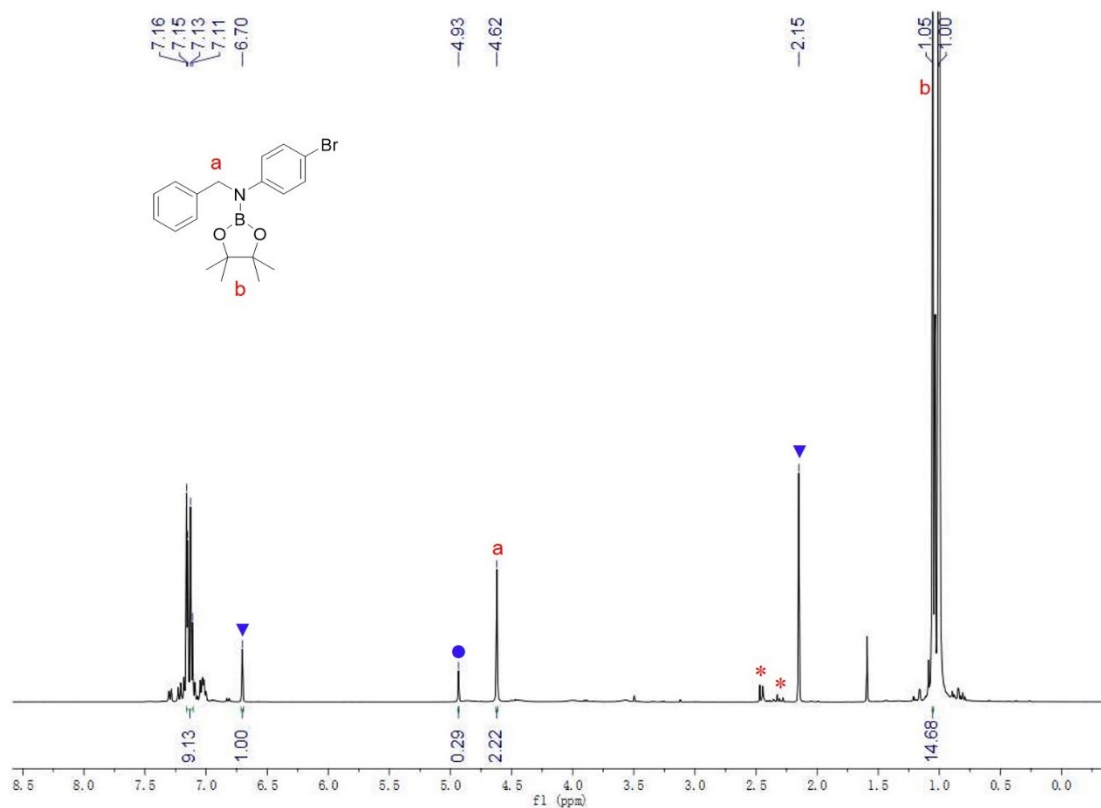

**Fig. S37.** Quantitative <sup>1</sup>H NMR spectrum of the products of the deoxygenative reduction of N-(4-bromophenyl)benzamide catalyzed by 5 mol% La(CH<sub>2</sub>C<sub>6</sub>H<sub>4</sub>NMe<sub>2</sub>-*o*)<sub>3</sub> at 120 °C for 24 h. \* = pinBCH<sub>2</sub>C<sub>6</sub>H<sub>4</sub>NMe<sub>2</sub>-*o*, ▼ = 1,3,5-trimethylbenzene, ● = pinBOCH<sub>2</sub>C<sub>6</sub>H<sub>5</sub> (400 MHz, C<sub>6</sub>D<sub>6</sub>, 25 °C, **2e**, Table 2).

*N*-Benzyl-*N*-(4-Bromophenyl)-4,4,5,5-Tetramethyl-1,3,2-Dioxaborolan-2-Amine.<sup>11</sup> <sup>1</sup>H NMR (400 MHz, C<sub>6</sub>D<sub>6</sub>, ppm): δ 7.16 - 7.11 (m, 9H, -*Ph*), 4.62 (s, 2H, -NCH<sub>2</sub>Ph), 1.05 (s, 12H, -NBpin).

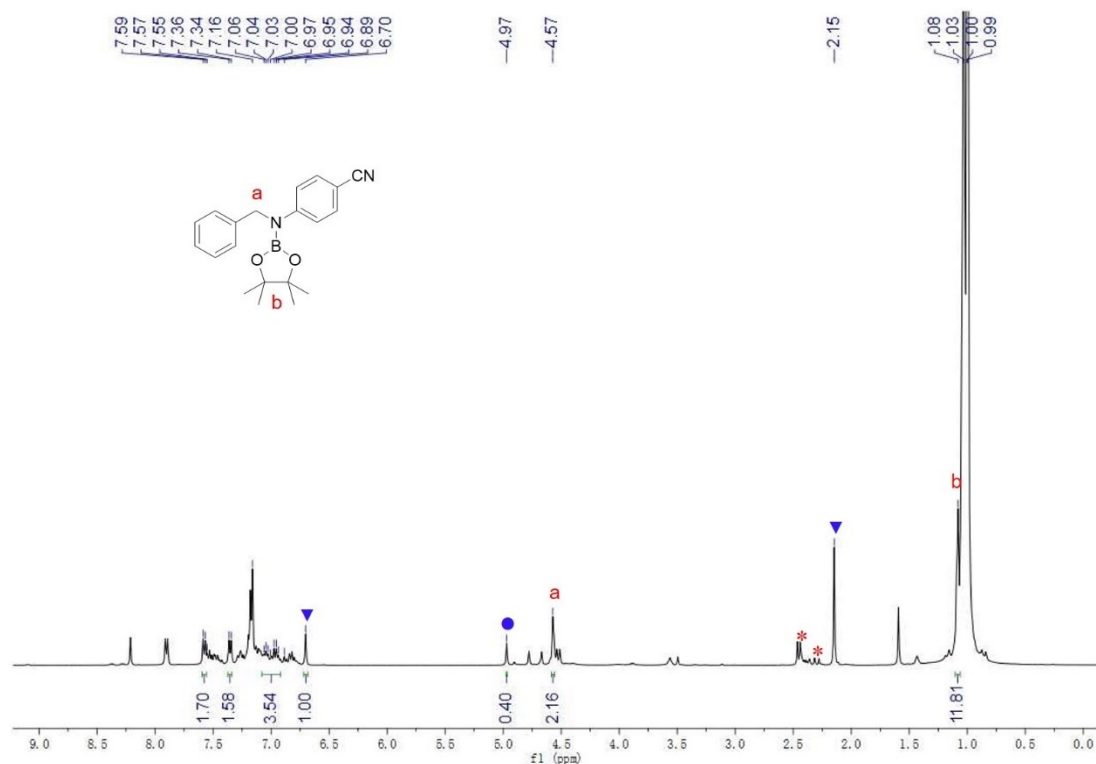

**Fig. S38.** Quantitative  $^1\text{H}$  NMR spectrum of the products of the deoxygenative reduction of *N*-(4-cyanophenyl)benzamide catalyzed by 5 mol%  $\text{La}(\text{CH}_2\text{C}_6\text{H}_4\text{NMe}_2\text{-}o)_3$  at 120 °C for 24 h. \* =  $\text{pinBCH}_2\text{C}_6\text{H}_4\text{NMe}_2\text{-}o$ ,  $\blacktriangledown$  = 1,3,5-trimethylbenzene,  $\bullet$  =  $\text{pinBOCH}_2\text{C}_6\text{H}_5$  (400 MHz,  $\text{C}_6\text{D}_6$ , 25 °C, **2f**, Table 2).

*4*-(*Benzyl*(4,4,5,5-Tetramethyl-1,3,2-Dioxaborolan-2-yl)Amino)Benzonitrile.  $^1\text{H}$  NMR (400 MHz,  $\text{C}_6\text{D}_6$ , ppm):  $\delta$  7.58 (d,  $J = 7.9$  Hz, 2H, -Ph), 7.35 (d,  $J = 7.7$  Hz, 2H, -Ph), 7.06 - 6.89 (m, 5H, -Ph), 4.57 (s, 2H,  $-\text{NCH}_2\text{Ph}$ ), 1.08 (s, 12H, -NBpin).

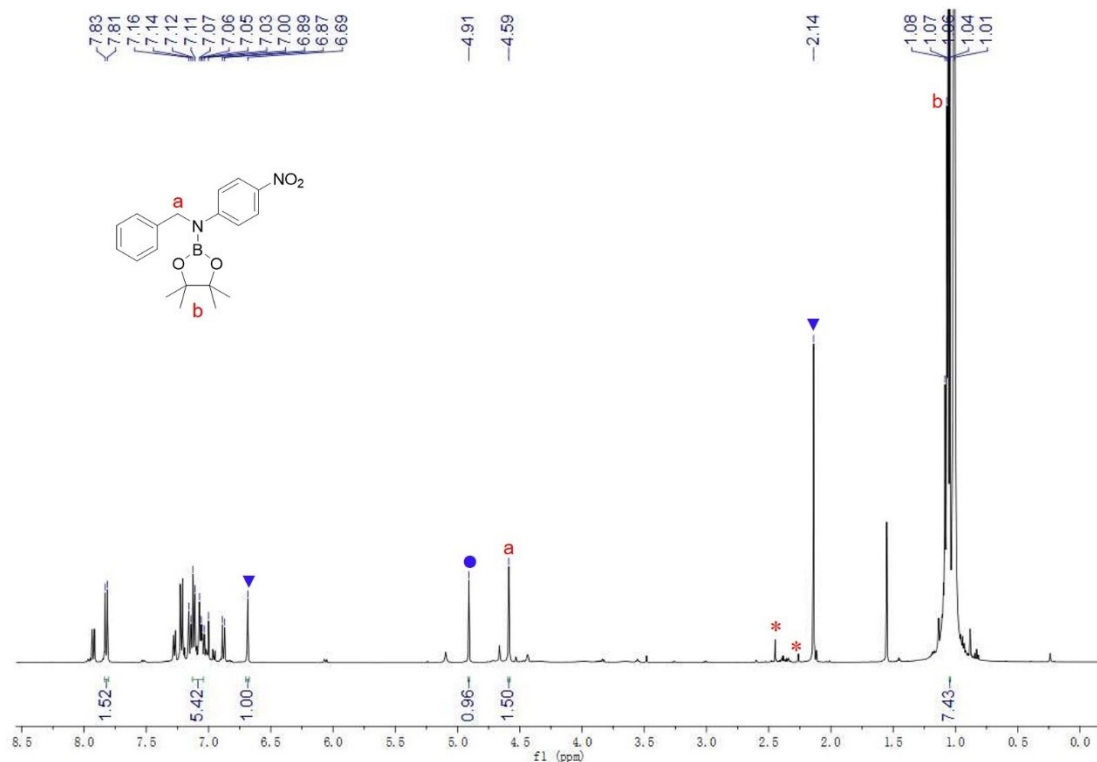

**Fig. S39.** Quantitative  $^1\text{H}$  NMR spectrum of the products of the deoxygenative reduction of *N*-(4-nitrophenyl)benzamide catalyzed by 5 mol%  $\text{La}(\text{CH}_2\text{C}_6\text{H}_4\text{NMe}_2\text{-}o)_3$  at 120 °C for 24 h. \* =  $\text{pinBCH}_2\text{C}_6\text{H}_4\text{NMe}_2\text{-}o$ ,  $\blacktriangledown$  = 1,3,5-trimethylbenzene,  $\bullet$  =  $\text{pinBOCH}_2\text{C}_6\text{H}_5$  (400 MHz,  $\text{C}_6\text{D}_6$ , 25 °C, **2g**, Table 2).

*N*-Benzyl-*N*-(4-Nitrophenyl)-4,4,5,5-Tetramethyl-1,3,2-Dioxaborolan-2-Amine.  $^1\text{H}$  NMR (400 MHz,  $\text{C}_6\text{D}_6$ , ppm):  $\delta$  7.82 (d,  $J = 9.4$  Hz, 2H, -*Ph*), 7.14 - 7.03 (m, 7H, -*Ph*), 4.59 (s, 2H, - $\text{NCH}_2\text{Ph}$ ), 1.08 (s, 12H, -NB*pin*).

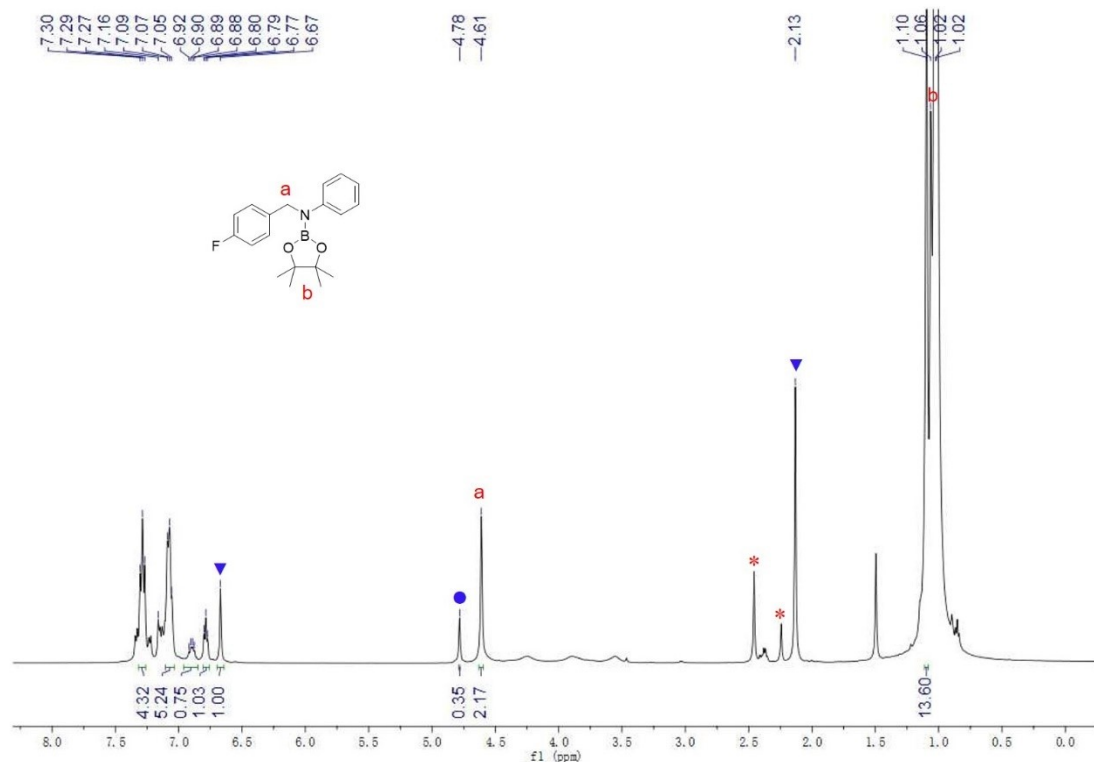

**Fig. S40.** Quantitative <sup>1</sup>H NMR spectrum of the products of the deoxygenative reduction of 4-fluoro-N-phenylbenzamide catalyzed by 5 mol% La(CH<sub>2</sub>C<sub>6</sub>H<sub>4</sub>NMe<sub>2</sub>-*o*)<sub>3</sub> at 120 °C for 24 h. \* = pinBCH<sub>2</sub>C<sub>6</sub>H<sub>4</sub>NMe<sub>2</sub>-*o*, ▼ = 1,3,5-trimethylbenzene, ● = pinBOCH<sub>2</sub>C<sub>6</sub>H<sub>4</sub>F-*p* (500 MHz, C<sub>6</sub>D<sub>6</sub>, 25 °C, **2h**, Table 2).

*N*-(4-Fluorobenzyl)-*N*-Phenyl-4,4,5,5-Tetramethyl-1,3,2-Dioxaborolan-2-Amine.<sup>11</sup> <sup>1</sup>H NMR (500 MHz, C<sub>6</sub>D<sub>6</sub>, ppm): δ 7.29 (d, *J* = 9.1 Hz, 2H, -*Ph*), 7.10 - 7.03 (m, 5H, -*Ph*), 6.90 (dd, *J* = 13.4, 7.2 Hz, 1H, -*Ph*), 6.79 (t, *J* = 7.0 Hz, 1H, -*Ph*), 4.61 (s, 2H, -NCH<sub>2</sub>PhF), 1.10 (s, 12H, -NBpin).

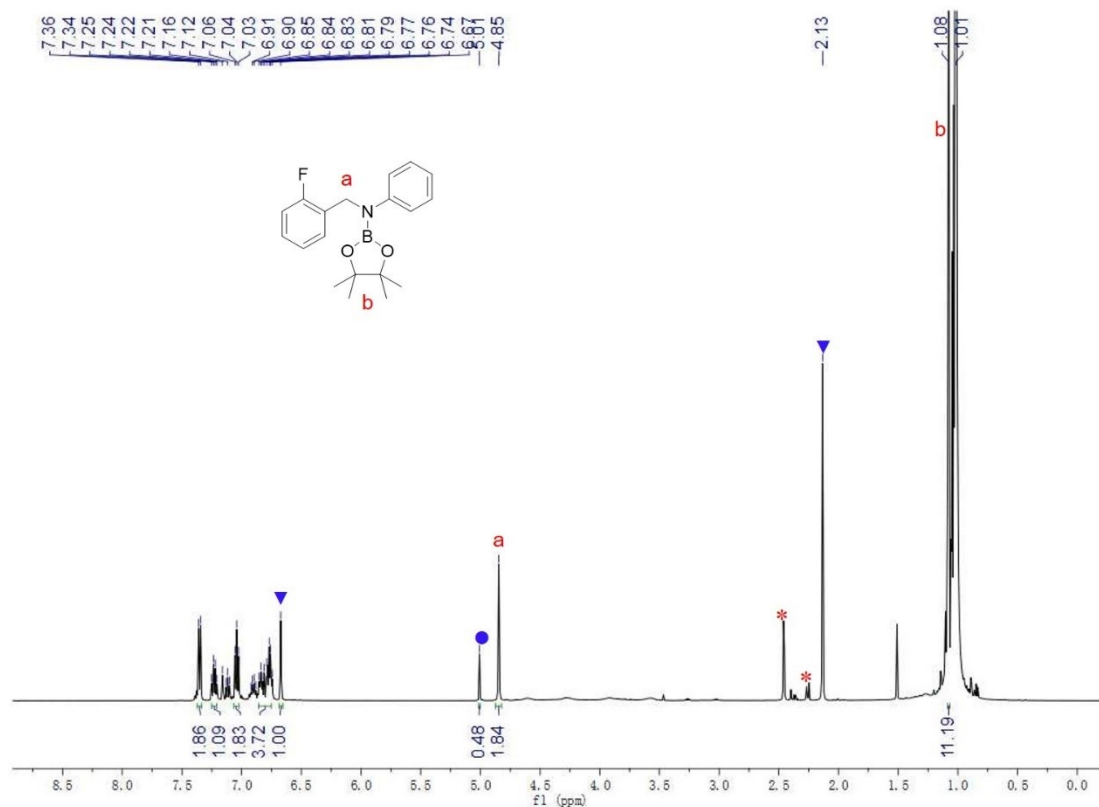

**Fig. S41.** Quantitative <sup>1</sup>H NMR spectrum of the products of the deoxygenative reduction of 2-fluoro-*N*-phenylbenzamide catalyzed by 5 mol% La(CH<sub>2</sub>C<sub>6</sub>H<sub>4</sub>NMe<sub>2</sub>-*o*)<sub>3</sub> at 120 °C for 24 h. \* = pinBCH<sub>2</sub>C<sub>6</sub>H<sub>4</sub>NMe<sub>2</sub>-*o*, ▼ = 1,3,5-trimethylbenzene, ● = pinBOCH<sub>2</sub>C<sub>6</sub>H<sub>4</sub>F-*o* (500 MHz, C<sub>6</sub>D<sub>6</sub>, 25 °C, **2i**, Table 2).

*N*-(2-Fluorobenzyl)-*N*-Phenyl-4,4,5,5-Tetramethyl-1,3,2-Dioxaborolan-2-Amine.<sup>12</sup> <sup>1</sup>H NMR (500 MHz, C<sub>6</sub>D<sub>6</sub>, ppm): δ 7.35 (d, *J* = 8.1 Hz, 2H, -*Ph*), 7.23 (dd, *J* = 14.9, 7.5 Hz, 1H, -*Ph*), 7.04 (t, *J* = 7.9 Hz, 2H, -*Ph*), 6.78 - 6.76 (m, 4H, -*Ph*), 4.85 (s, 2H, -NCH<sub>2</sub>PhF), 1.08 (s, 12H, -NBpin).

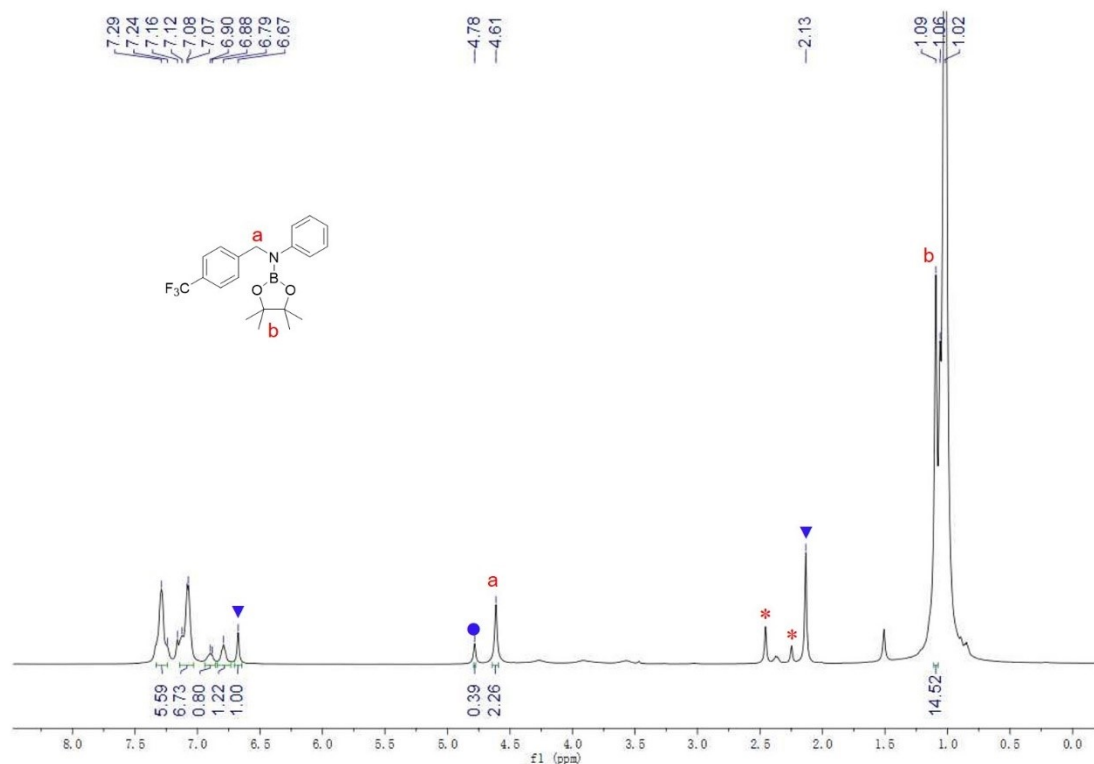

**Fig. S42.** Quantitative  $^1\text{H}$  NMR spectrum of the products of the deoxygenative reduction of *N*-phenyl-4-(trifluoromethyl)benzamide catalyzed by 5 mol%  $\text{La}(\text{CH}_2\text{C}_6\text{H}_4\text{NMe}_2\text{-}o)_3$  at 120 °C for 24 h. \* = pinBCH $_2$ C $_6$ H $_4$ NMe $_2$ -*o*, ▼ = 1,3,5-trimethylbenzene, ● = pinBOCH $_2$ C $_6$ H $_4$ CF $_3$ -*p* (500 MHz, C $_6$ D $_6$ , 25 °C, **2j**, Table 2).

*N*-(4-(Trifluoromethyl)Benzyl)-*N*-Phenyl-4,4,5,5-Tetramethyl-1,3,2-Dioxaborolan-2-*A*-mine.  $^1\text{H}$  NMR (500 MHz, C $_6$ D $_6$ , ppm):  $\delta$  7.26 (d,  $J$  = 24.3 Hz, 3H, -*Ph*), 7.14 - 7.03 (m, 4H, -*Ph*), 6.89 (d,  $J$  = 7.0 Hz, 1H, -*Ph*), 6.79 (s, 1H), 4.61 (s, 2H, -NCH $_2$ PhCF $_3$ ), 1.09 (s, 12H, -NBpin).

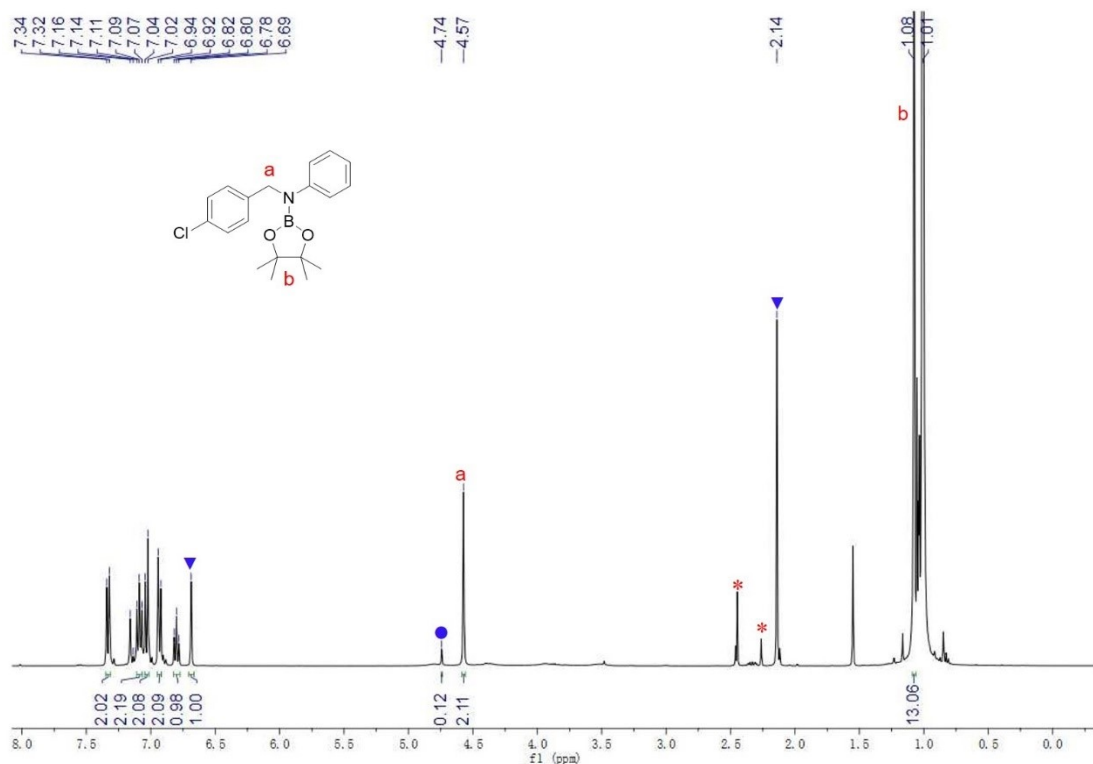

**Fig. S43.** Quantitative <sup>1</sup>H NMR spectrum of the products of the deoxygenative reduction of 4-chloro-N-phenylbenzamide catalyzed by 5 mol% La(CH<sub>2</sub>C<sub>6</sub>H<sub>4</sub>NMe<sub>2</sub>-*o*)<sub>3</sub> at 120 °C for 24 h. \* = pinBCH<sub>2</sub>C<sub>6</sub>H<sub>4</sub>NMe<sub>2</sub>-*o*, ▼ = 1,3,5-trimethylbenzene, ● = pinBOCH<sub>2</sub>C<sub>6</sub>H<sub>4</sub>Cl-*p* (400 MHz, C<sub>6</sub>D<sub>6</sub>, 25 °C, **2k**, Table 2).

*N*-(4-Chlorobenzyl)-*N*-Phenyl-4,4,5,5-Tetramethyl-1,3,2-Dioxaborolan-2-Amine.<sup>11</sup> <sup>1</sup>H NMR (400 MHz, C<sub>6</sub>D<sub>6</sub>, ppm): δ 7.33 (d, *J* = 7.9 Hz, 2H, -*Ph*), 7.12 - 7.06 (m, 2H, -*Ph*), 7.03 (d, *J* = 8.4 Hz, 2H, -*Ph*), 6.93 (d, *J* = 8.4 Hz, 2H, -*Ph*), 6.80 (t, *J* = 7.3 Hz, 1H, -*Ph*), 4.57 (s, 2H, -NCH<sub>2</sub>PhCl), 1.08 (s, 12H, -NBpin).



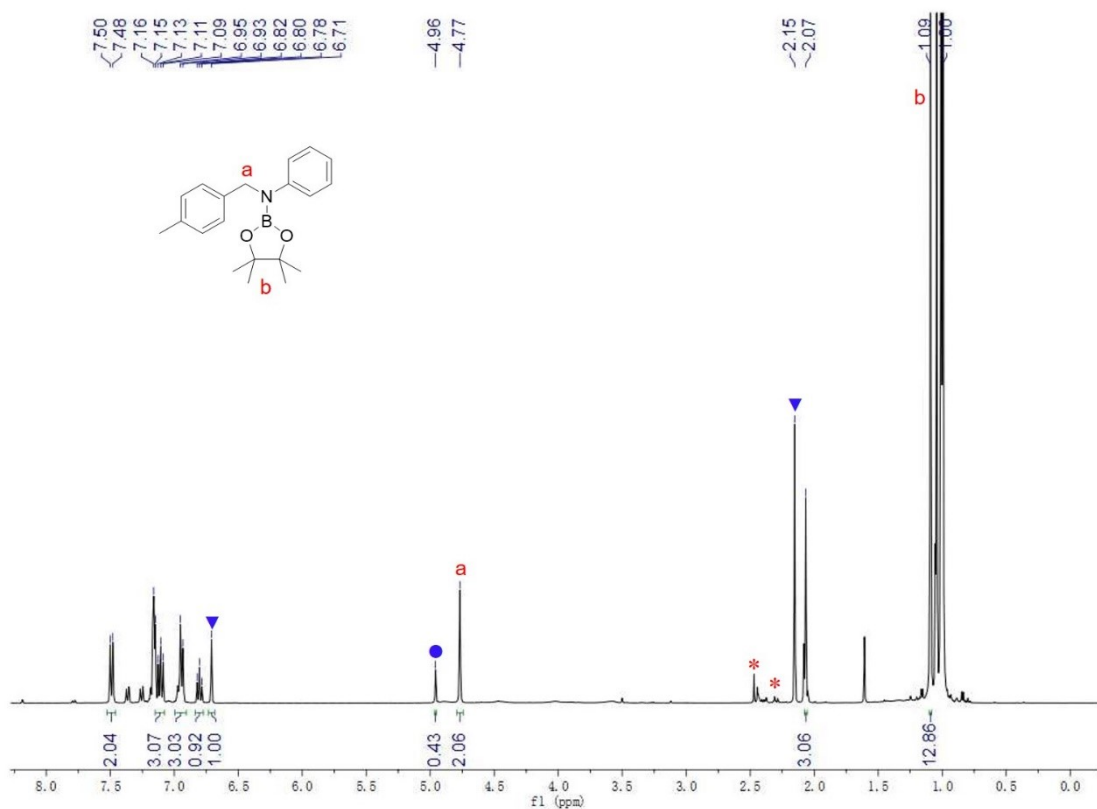

**Fig. S44.** Quantitative  $^1\text{H}$  NMR spectrum of the products of the deoxygenative reduction of 4-methyl-N-phenylbenzamide catalyzed by 5 mol%  $\text{La}(\text{CH}_2\text{C}_6\text{H}_4\text{NMe}_2\text{-}o)_3$  at 120 °C for 24 h. \* =  $\text{pinBCH}_2\text{C}_6\text{H}_4\text{NMe}_2\text{-}o$ , ▼ = 1,3,5-trimethylbenzene, ● =  $\text{pinBOCH}_2\text{C}_6\text{H}_4\text{Me-}p$  (400 MHz,  $\text{C}_6\text{D}_6$ , 25 °C, **2I**, Table 2).

*N*-(4-Methylbenzyl)-*N*-Phenyl-4,4,5,5-Tetramethyl-1,3,2-Dioxaborolan-2-Amine.<sup>11</sup>  $^1\text{H}$  NMR (400 MHz,  $\text{C}_6\text{D}_6$ , ppm):  $\delta$  7.49 (d,  $J = 7.8$  Hz, 2H, -*Ph*), 7.13 - 7.08 (m, 3H, -*Ph*), 6.94 (d,  $J = 7.9$  Hz, 3H, -*Ph*), 6.80 (t,  $J = 7.3$  Hz, 1H, -*Ph*), 4.77 (s, 2H, - $\text{NCH}_2\text{PhCH}_3$ ), 2.07 (s, 3H, - $\text{NCH}_2\text{PhCH}_3$ ), 1.09 (s, 12H, -NBpin).

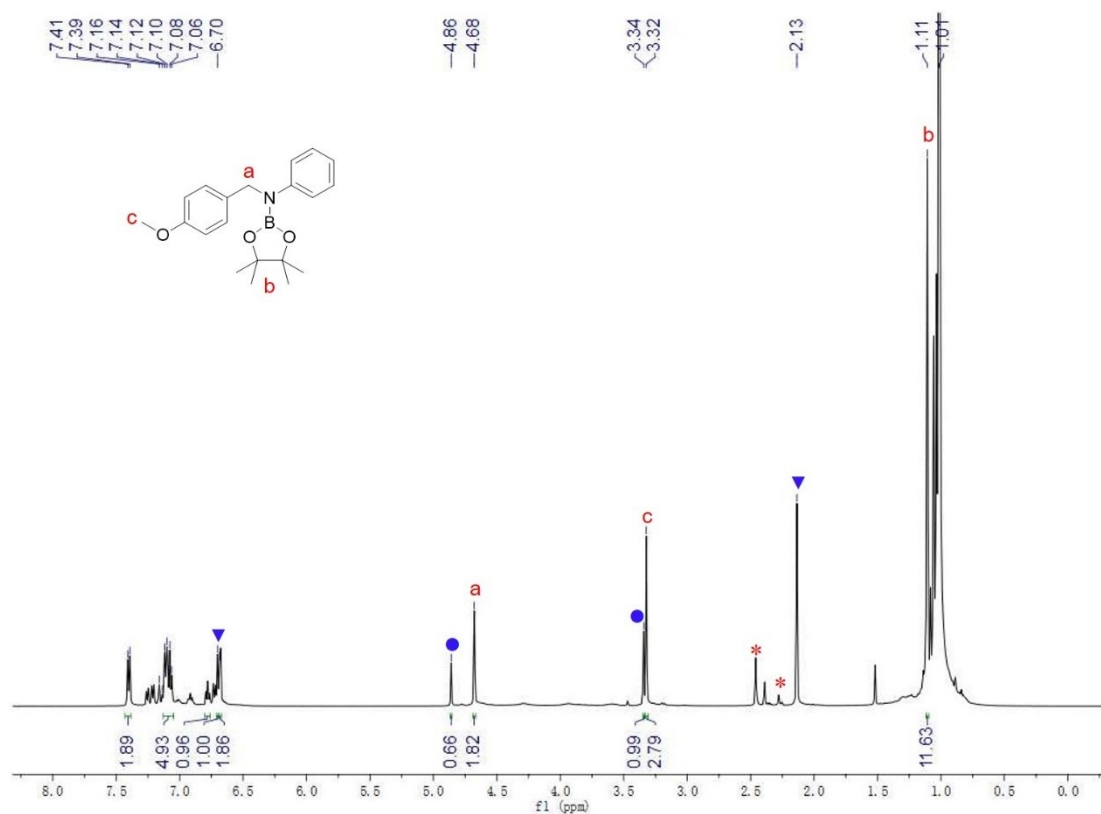

**Fig. S45.** Quantitative <sup>1</sup>H NMR spectrum of the products of the deoxygenative reduction of 4-methoxy-N-phenylbenzamide catalyzed by 5 mol% La(CH<sub>2</sub>C<sub>6</sub>H<sub>4</sub>NMe<sub>2</sub>-o)<sub>3</sub> at 120 °C for 24 h. \* = pinBCH<sub>2</sub>C<sub>6</sub>H<sub>4</sub>NMe<sub>2</sub>-o, ▼ = 1,3,5-trimethylbenzene, ● = pinBOCH<sub>2</sub>C<sub>6</sub>H<sub>4</sub>OMe-p (500 MHz, C<sub>6</sub>D<sub>6</sub>, 25 °C, **2m**, Table 2). *N*-(4-Methoxybenzyl)-*N*-Phenyl-4,4,5,5-Tetramethyl-1,3,2-Dioxaborolan-2-Amine.<sup>11</sup>  
<sup>1</sup>H NMR (500 MHz, C<sub>6</sub>D<sub>6</sub>, ppm): δ 7.40 (d, *J* = 8.3 Hz, 2H, -Ph), 7.16 - 7.03 (m, 5H, -Ph), 6.78 (td, *J* = 7.4, 0.8 Hz, 1H, -Ph), 6.68 (d, *J* = 3.6 Hz, 2H, -Ph), 4.68 (s, 2H, -NCH<sub>2</sub>PhOCH<sub>3</sub>), 3.32 (s, 3H, -NCH<sub>2</sub>PhOCH<sub>3</sub>), 1.11 (s, 12H, -NBpin).

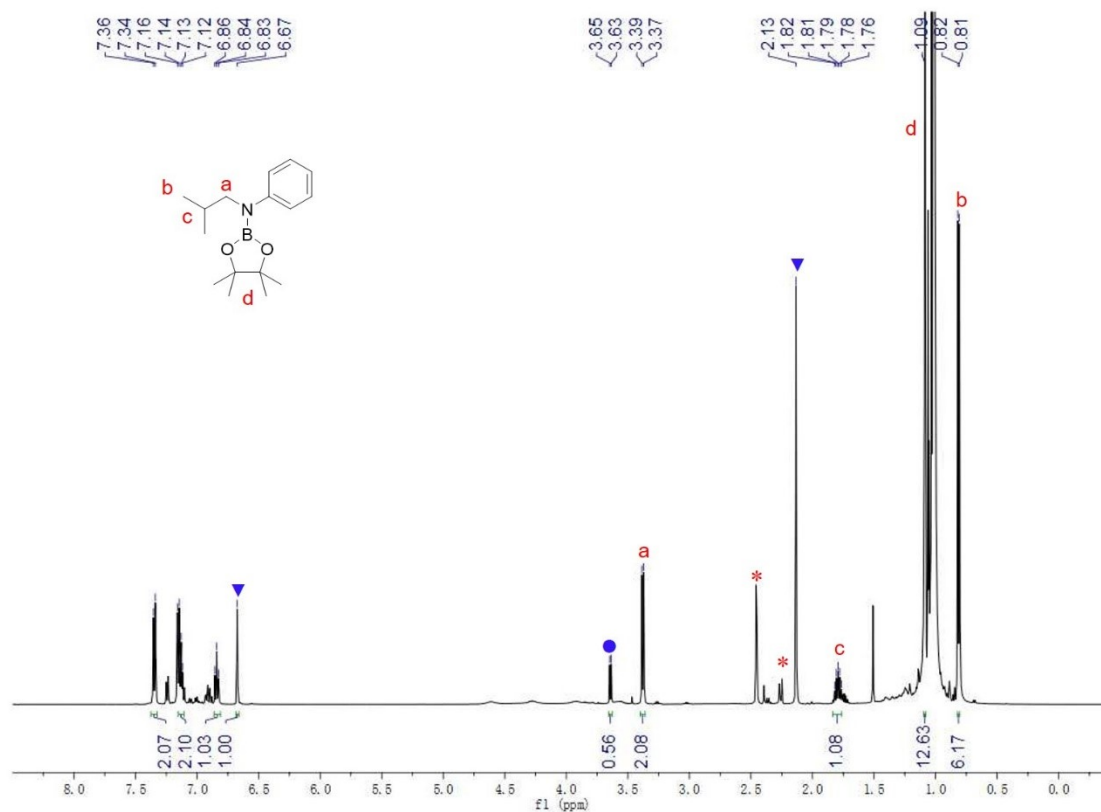

**Fig. S46.** Quantitative  $^1\text{H}$  NMR spectrum of the products of the deoxygenative reduction of N-phenylisobutyramide catalyzed by 5 mol%  $\text{La}(\text{CH}_2\text{C}_6\text{H}_4\text{NMe}_2\text{-}o)_3$  at 120 °C for 24 h. \* =  $\text{pinBCH}_2\text{C}_6\text{H}_4\text{NMe}_2\text{-}o$ ,  $\blacktriangledown$  = 1,3,5-trimethylbenzene,  $\bullet$  =  $\text{pinBOCH}_2\text{CH}(\text{CH}_3)_2$  (500 MHz,  $\text{C}_6\text{D}_6$ , 25 °C, **2n**, Table 2).

*N*-Isobutyl-*N*-Phenyl-4,4,5,5-Tetramethyl-1,3,2-Dioxaborolan-2-Amine.  $^1\text{H}$  NMR (500 MHz,  $\text{C}_6\text{D}_6$ , ppm):  $\delta$  7.35 (d,  $J = 8.0$  Hz, 2H, -Ph), 7.15 - 7.10 (m, 2H, -Ph), 6.84 (t,  $J = 7.3$  Hz, 1H, -Ph), 3.38 (d,  $J = 7.3$  Hz, 2H,  $-\text{NCH}_2\text{CH}(\text{CH}_3)_2$ ), 1.79 (dt,  $J = 13.6, 6.8$  Hz, 1H,  $-\text{NCH}_2\text{CH}(\text{CH}_3)_2$ ), 1.09 (s, 12H, -NBpin), 0.81 (d,  $J = 6.7$  Hz, 6H,  $-\text{NCH}_2\text{CH}(\text{CH}_3)_2$ ).

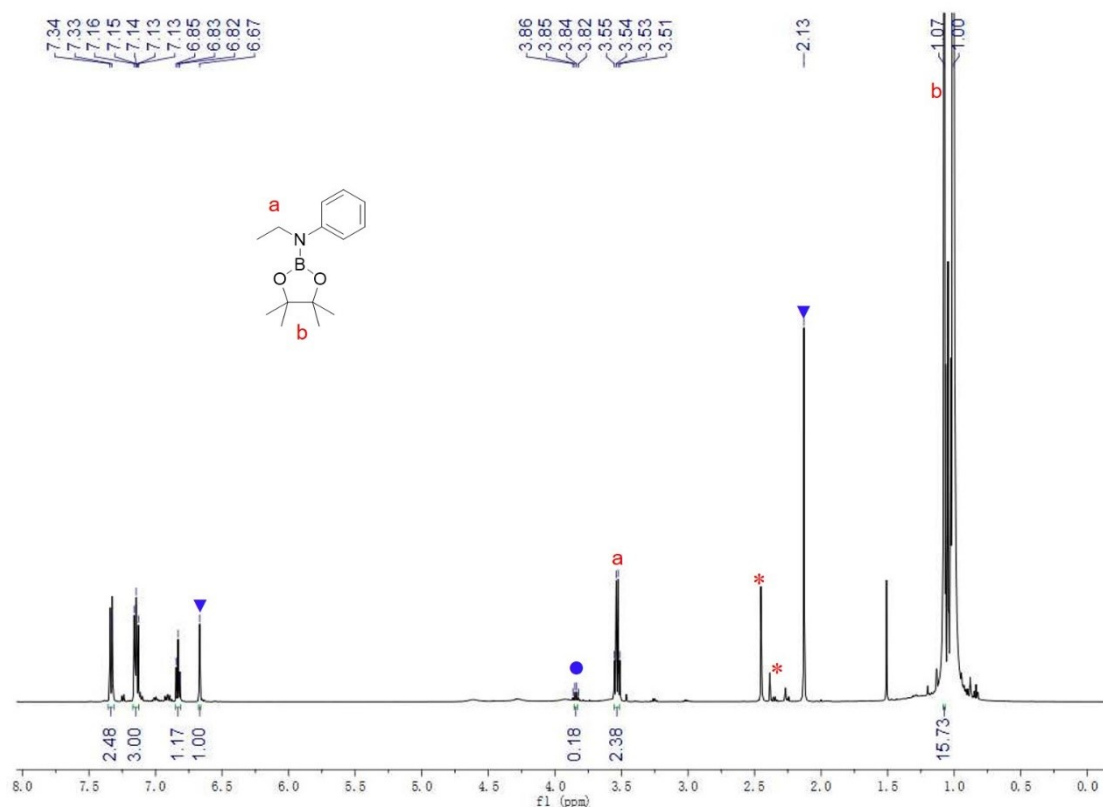

**Fig. S47.** Quantitative  $^1\text{H}$  NMR spectrum of the products of the deoxygenative reduction of *N*-phenylacetamide catalyzed by 5 mol%  $\text{La}(\text{CH}_2\text{C}_6\text{H}_4\text{NMe}_2\text{-}o)_3$  at 120  $^\circ\text{C}$  for 24 h. \* =  $\text{pinBCH}_2\text{C}_6\text{H}_4\text{NMe}_2\text{-}o$ ,  $\blacktriangledown$  = 1,3,5-trimethylbenzene,  $\bullet$  =  $\text{pinBOCH}_2\text{CH}_3$  (500 MHz,  $\text{C}_6\text{D}_6$ , 25  $^\circ\text{C}$ , **2o**, Table 2).

*N*-Propyl-*N*-Phenyl-4,4,5,5-Tetramethyl-1,3,2-Dioxaborolan-2-Amine.<sup>13</sup>  $^1\text{H}$  NMR (500 MHz,  $\text{C}_6\text{D}_6$ , ppm):  $\delta$  7.34 (d,  $J = 7.9$  Hz, 2H, -Ph), 7.17 - 7.12 (m, 2H, -Ph), 6.83 (t,  $J = 6.8$  Hz, 1H, -Ph), 3.53 (q,  $J = 7.0$  Hz, 2H, - $\text{NCH}_2\text{CH}_3$ ), 1.07 (s, 12H, -NBpin).

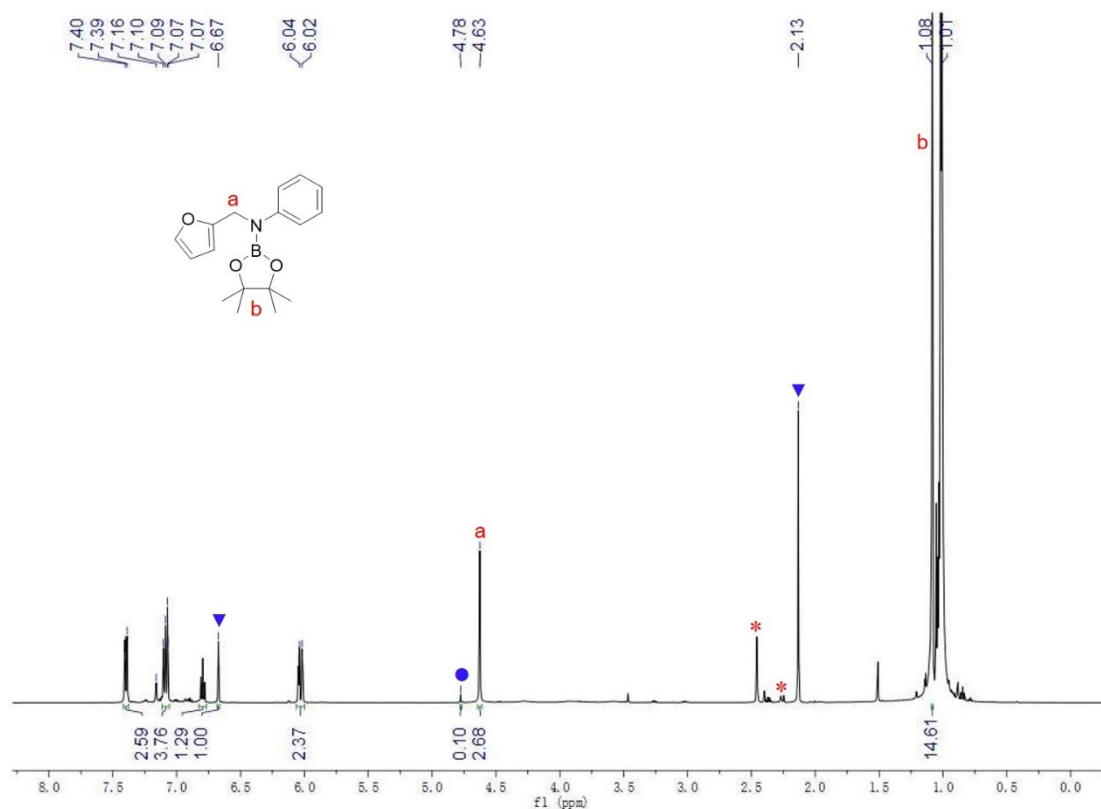

**Fig. S48.** Quantitative  $^1\text{H}$  NMR spectrum of the products of the deoxygenative reduction of *N*-phenylthiophene-2-carboxamide catalyzed by 5 mol%  $\text{La}(\text{CH}_2\text{C}_6\text{H}_4\text{NMe}_2\text{-}o)_3$  at 120 °C for 24 h. \* =  $\text{pinBCH}_2\text{C}_6\text{H}_4\text{NMe}_2\text{-}o$ , ▼ = 1,3,5-trimethylbenzene, ● =  $\text{pinBOCH}_2\text{C}_4\text{H}_3\text{O}$  (500 MHz,  $\text{C}_6\text{D}_6$ , 25 °C, **2p**, Table 2).

*N*-(Furan-2-Ylmethyl)-*N*-Phenyl-4,4,5,5-Tetramethyl-1,3,2-Dioxaborolan-2-Amine.

$^1\text{H}$  NMR (500 MHz,  $\text{C}_6\text{D}_6$ , ppm):  $\delta$  7.40 (d,  $J = 7.8$  Hz, 2H, -*Ph*), 7.11 - 7.07 (m, 3H, -*Ph*), 6.82 - 6.77 (m, 1H, - $\text{NCH}_2\text{C}_4\text{H}_3\text{O}$ ), 6.03 (d,  $J = 9.2$  Hz, 2H, - $\text{NCH}_2\text{C}_4\text{H}_3\text{O}$ ), 4.63 (s, 2H, - $\text{NCH}_2\text{C}_4\text{H}_3\text{O}$ ), 1.08 (s, 12H, -NBpin).

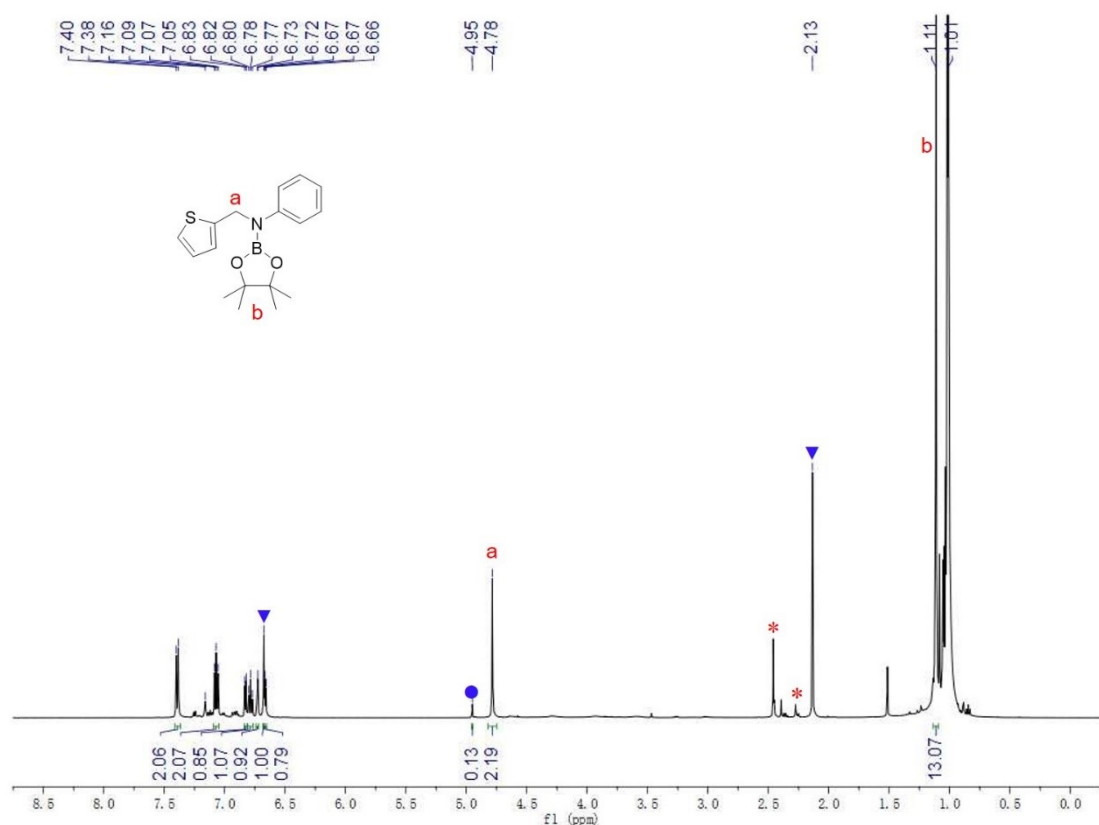

**Fig. S49.** Quantitative  $^1\text{H}$  NMR spectrum of the products of the deoxygenative reduction of *N*-phenylfuran-2-carboxamide catalyzed by 5 mol%  $\text{La}(\text{CH}_2\text{C}_6\text{H}_4\text{NMe}_2\text{-}o)_3$  at 120  $^\circ\text{C}$  for 24 h. \* =  $\text{pinBCH}_2\text{C}_6\text{H}_4\text{NMe}_2\text{-}o$ ,  $\blacktriangledown$  = 1,3,5-trimethylbenzene,  $\bullet$  =  $\text{pinBOCH}_2\text{C}_4\text{H}_3\text{S}$  (500 MHz,  $\text{C}_6\text{D}_6$ , 25  $^\circ\text{C}$ , **2q**, Table 2).

*N*-(Thiophen-2-ylmethyl)-*N*-Phenyl-4,4,5,5-Tetramethyl-1,3,2-Dioxaborolan-2-Amine.  
 $^1\text{H}$  NMR (500 MHz,  $\text{C}_6\text{D}_6$ , ppm):  $\delta$  7.39 (d,  $J = 7.9$  Hz, 2H, -Ph), 7.09 - 7.04 (m, 2H, -Ph), 6.83 (d,  $J = 6.0$  Hz, 1H,  $-\text{NCH}_2\text{C}_4\text{H}_3\text{S}$ ), 6.78 (t,  $J = 7.3$  Hz, 1H, -Ph), 6.73 (d,  $J = 2.5$  Hz, 1H,  $-\text{NCH}_2\text{C}_4\text{H}_3\text{S}$ ), 6.66 (d,  $J = 5.0$  Hz, 1H,  $-\text{NCH}_2\text{C}_4\text{H}_3\text{S}$ ), 4.78 (s, 2H,  $-\text{NCH}_2\text{C}_4\text{H}_3\text{S}$ ), 1.11 (s, 12H, -NBpin).

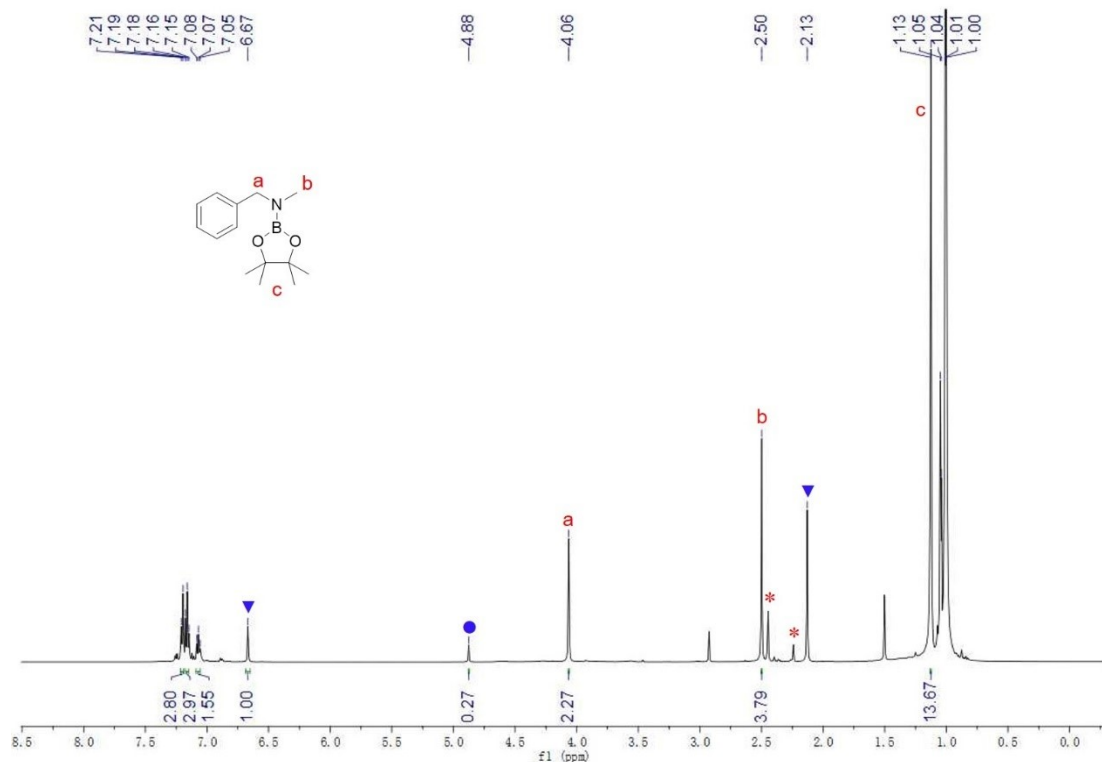

**Fig. S50.** Quantitative  $^1\text{H}$  NMR spectrum of the products of the deoxygenative reduction of *N*-methylbenzamide catalyzed by 5 mol%  $\text{La}(\text{CH}_2\text{C}_6\text{H}_4\text{NMe}_2\text{-}o)_3$  at  $120^\circ\text{C}$  for 24 h. \* =  $\text{pinBCH}_2\text{C}_6\text{H}_4\text{NMe}_2\text{-}o$ ,  $\blacktriangledown$  = 1,3,5-trimethylbenzene,  $\bullet$  =  $\text{pinBOCH}_2\text{C}_6\text{H}_5$  (500 MHz,  $\text{C}_6\text{D}_6$ ,  $25^\circ\text{C}$ , **2r**, Table 2).

*N*-Benzyl-*N*,4,4,5,5-Pentamethyl-1,3,2-Dioxaborolan-2-Amine.<sup>3</sup>  $^1\text{H}$  NMR (500 MHz,  $\text{C}_6\text{D}_6$ , ppm):  $\delta$  7.20 (d,  $J = 7.2$  Hz, 2H, -Ph), 7.16 (t,  $J = 7.5$  Hz, 2H, -Ph), 7.07 (t,  $J = 7.1$  Hz, 1H, -Ph), 4.06 (s, 2H,  $-\text{NCH}_2\text{Ph}$ ), 2.50 (s, 3H,  $-\text{NCH}_3$ ), 1.13 (s, 12H,  $-\text{NBpin}$ ).

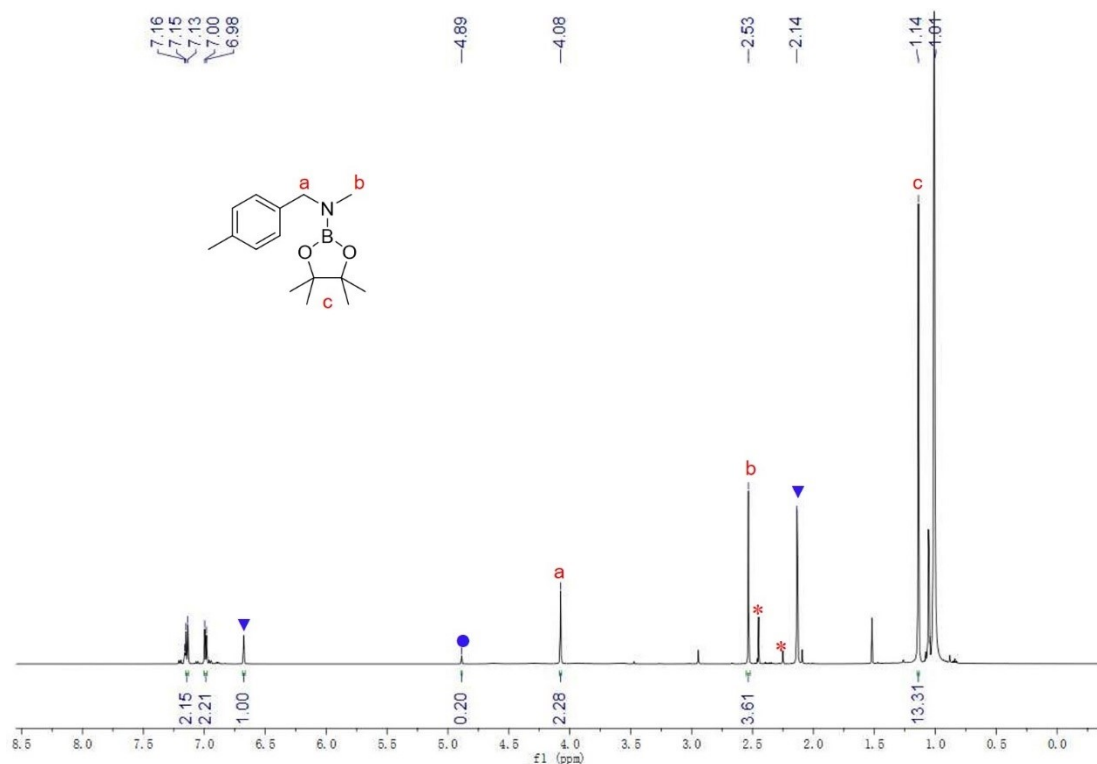

**Fig. S51.** Quantitative  $^1\text{H}$  NMR spectrum of the products of the deoxygenative reduction of *N*,4-dimethylbenzamide catalyzed by 5 mol%  $\text{La}(\text{CH}_2\text{C}_6\text{H}_4\text{NMe}_2\text{-}o)_3$  at 120 °C for 24 h. \* =  $\text{pinBCH}_2\text{C}_6\text{H}_4\text{NMe}_2\text{-}o$ ,  $\blacktriangledown$  = 1,3,5-trimethylbenzene,  $\bullet$  =  $\text{pinBOCH}_2\text{C}_6\text{H}_4\text{Me-}p$  (500 MHz,  $\text{C}_6\text{D}_6$ , 25 °C, **2s**, Table 2).

*N*-(4-Methylbenzyl)-*N*,4,4,5,5-Pentamethyl-1,3,2-Dioxaborolan-2-Amine.  $^1\text{H}$  NMR (500 MHz,  $\text{C}_6\text{D}_6$ , ppm):  $\delta$  7.14 (d,  $J = 7.9$  Hz, 2H, -Ph), 6.99 (d,  $J = 7.8$  Hz, 2H, -Ph), 4.08 (s, 2H,  $-\text{NCH}_2\text{PhCH}_3$ ), 2.53 (s, 3H,  $-\text{NCH}_3$ ), 1.14 (s, 12H,  $-\text{NBpin}$ ).



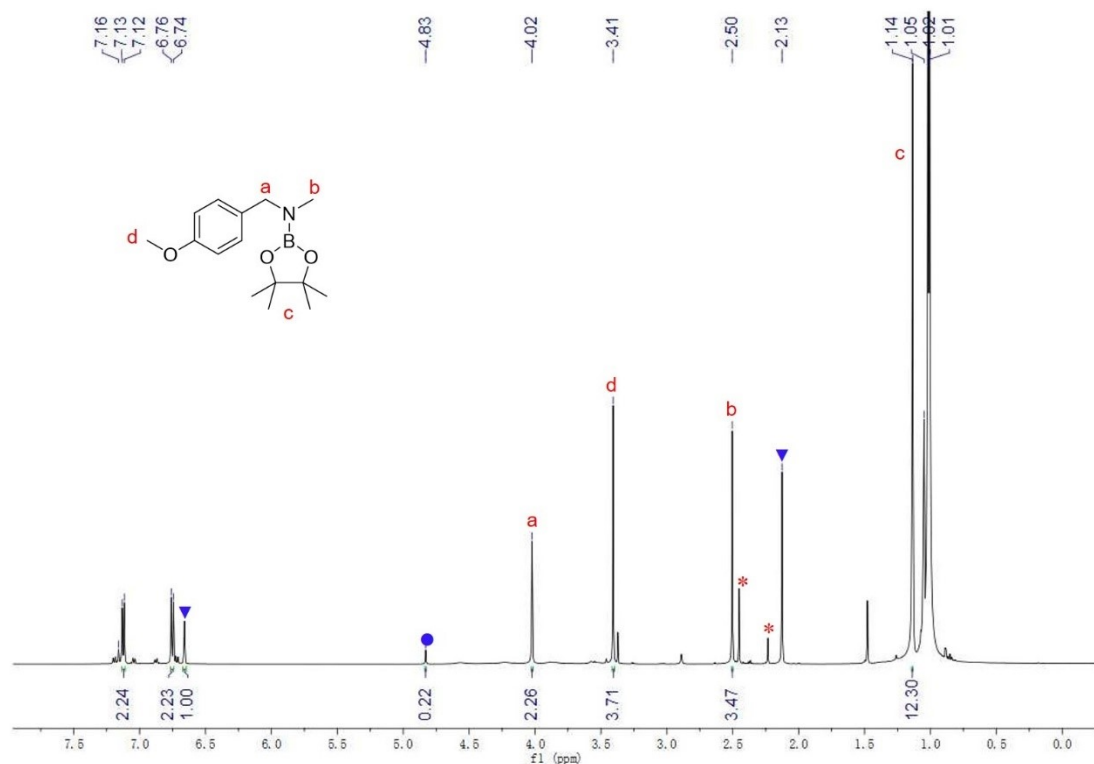

**Fig. S52.** Quantitative <sup>1</sup>H NMR spectrum of the products of the deoxygenative reduction of 4-methoxy-*N*-methylbenzamide catalyzed by 5 mol% La(CH<sub>2</sub>C<sub>6</sub>H<sub>4</sub>NMe<sub>2</sub>-*o*)<sub>3</sub> at 120 °C for 24 h. \* = pinBCH<sub>2</sub>C<sub>6</sub>H<sub>4</sub>NMe<sub>2</sub>-*o*, ▼ = 1,3,5-trimethylbenzene, ● = pinBOCH<sub>2</sub>C<sub>6</sub>H<sub>4</sub>OMe-*p* (500 MHz, C<sub>6</sub>D<sub>6</sub>, 25 °C, **2t**, Table 2). *N*-(4-Methoxybenzyl)-*N*,4,4,5,5-Pentamethyl-1,3,2-Dioxaborolan-2-Amine.<sup>14</sup> <sup>1</sup>H NMR (500 MHz, C<sub>6</sub>D<sub>6</sub>, ppm): δ 7.12 (d, *J* = 8.5 Hz, 2H, -*Ph*), 6.75 (d, *J* = 8.6 Hz, 2H, -*Ph*), 4.02 (s, 2H, -NCH<sub>2</sub>PhOCH<sub>3</sub>), 3.41 (s, 3H, -NCH<sub>2</sub>PhOCH<sub>3</sub>), 2.50 (s, 3H, -NCH<sub>3</sub>), 1.14 (s, 12H, -NBpin).

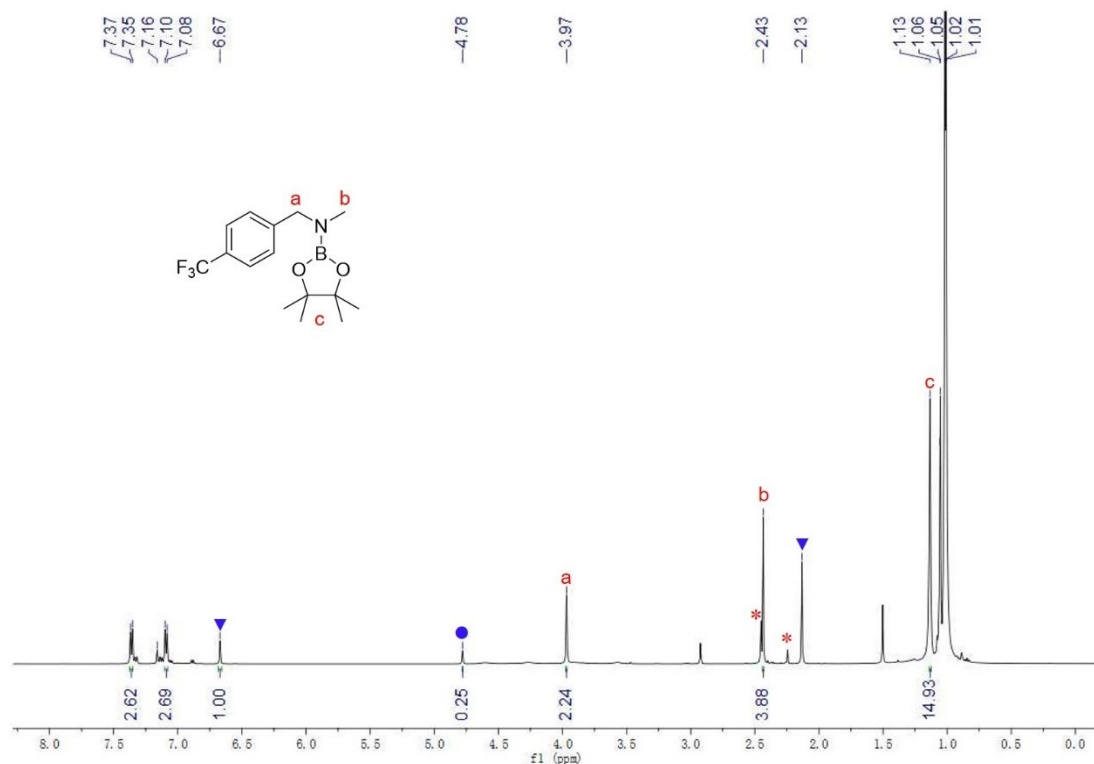

**Fig. S53.** Quantitative  $^1\text{H}$  NMR spectrum of the products of the deoxygenative reduction of *N*-methyl-4-(trifluoromethyl)benzamide catalyzed by 5 mol%  $\text{La}(\text{CH}_2\text{C}_6\text{H}_4\text{NMe}_2\text{-}o)_3$  at 120  $^\circ\text{C}$  for 24 h. \* =  $\text{pinBCH}_2\text{C}_6\text{H}_4\text{NMe}_2\text{-}o$ ,  $\blacktriangledown$  = 1,3,5-trimethylbenzene,  $\bullet$  =  $\text{pinBOCH}_2\text{C}_6\text{H}_4\text{CF}_3\text{-}p$  (500 MHz,  $\text{C}_6\text{D}_6$ , 25  $^\circ\text{C}$ , **2u**, Table 2). *N*-(4-(Trifluoromethyl)benzyl)-*N*,4,4,5,5-Pentamethyl-1,3,2-Dioxaborolan-2-Amine.  $^1\text{H}$  NMR (500 MHz,  $\text{C}_6\text{D}_6$ , ppm):  $\delta$  7.36 (d,  $J$  = 8.0 Hz, 2H, -*Ph*), 7.09 (d,  $J$  = 7.9 Hz, 2H, -*Ph*), 3.97 (s, 2H, - $\text{NCH}_2\text{PhCF}_3$ ), 2.43 (s, 3H, - $\text{NCH}_3$ ), 1.13 (s, 12H, -NBpin).

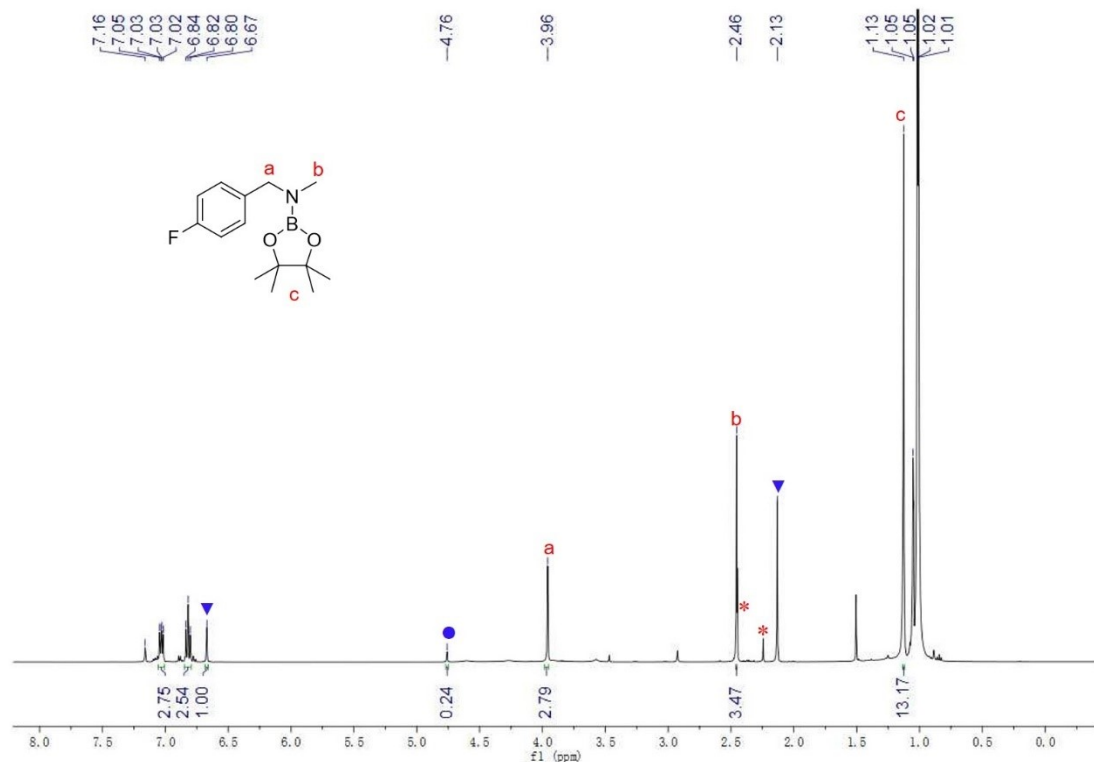

**Fig. S54.** Quantitative  $^1\text{H}$  NMR spectrum of the products of the deoxygenative reduction of 4-fluoro-*N*-methylbenzamide catalyzed by 5 mol%  $\text{La}(\text{CH}_2\text{C}_6\text{H}_4\text{NMe}_2\text{-}o)_3$  at 120 °C for 24 h. \* = pinBCH<sub>2</sub>C<sub>6</sub>H<sub>4</sub>NMe<sub>2</sub>-*o*, ▼ = 1,3,5-trimethylbenzene, ● = pinBOCH<sub>2</sub>C<sub>6</sub>H<sub>4</sub>F-*p* (500 MHz, C<sub>6</sub>D<sub>6</sub>, 25 °C, **2v**, Table 2).

*N*-(4-Fluorobenzyl)-*N*,4,4,5,5-Pentamethyl-1,3,2-Dioxaborolan-2-Amine.  $^1\text{H}$  NMR (500 MHz, C<sub>6</sub>D<sub>6</sub>, ppm):  $\delta$  7.03 (dd,  $J$  = 8.6, 5.5 Hz, 2H, -*Ph*), 6.82 (t,  $J$  = 8.7 Hz, 2H, -*Ph*), 3.96 (s, 2H, -NCH<sub>2</sub>PhF), 2.46 (s, 3H, -NCH<sub>3</sub>), 1.13 (s, 12H, -NBpin).

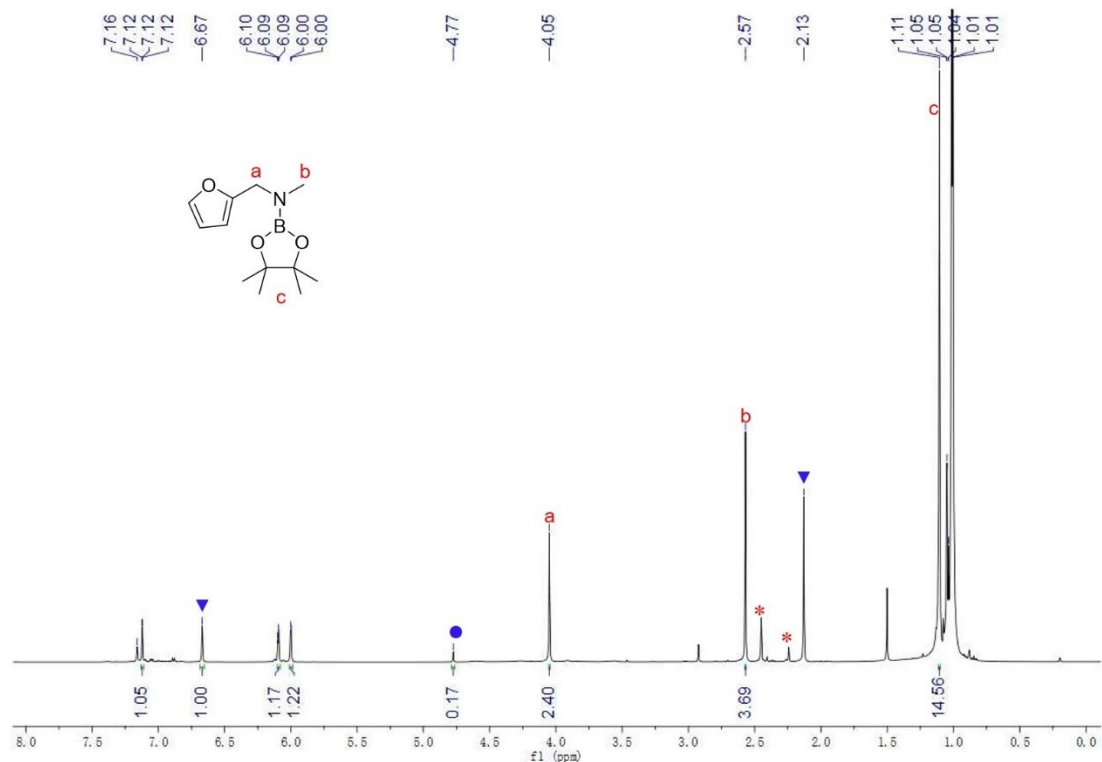

**Fig. S55.** Quantitative  $^1\text{H}$  NMR spectrum of the products of the deoxygenative reduction of *N*-methylfuran-2-carboxamide catalyzed by 5 mol%  $\text{La}(\text{CH}_2\text{C}_6\text{H}_4\text{NMe}_2\text{-}o)_3$  at 120 °C for 24 h. \* =  $\text{pinBCH}_2\text{C}_6\text{H}_4\text{NMe}_2\text{-}o$ ,  $\blacktriangledown$  = 1,3,5-trimethylbenzene,  $\bullet$  =  $\text{pinBOCH}_2\text{C}_4\text{H}_3\text{O}$  (500 MHz,  $\text{C}_6\text{D}_6$ , 25 °C, **2w**, Table 2).

*N*-(Furan-2-ylmethyl)-*N*,4,4,5,5-Pentamethyl-1,3,2-Dioxaborolan-2-Amine.  $^1\text{H}$  NMR (500 MHz,  $\text{C}_6\text{D}_6$ , ppm):  $\delta$  7.14 - 7.10 (m, 1H,  $-\text{NCH}_2\text{C}_4\text{H}_3\text{O}$ ), 6.11 - 6.08 (m, 1H,  $-\text{NCH}_2\text{C}_4\text{H}_3\text{O}$ ), 6.00 (d,  $J = 3.1$  Hz, 1H,  $-\text{NCH}_2\text{C}_4\text{H}_3\text{O}$ ), 4.05 (s, 2H,  $-\text{NCH}_2\text{C}_4\text{H}_3\text{O}$ ), 2.57 (s, 3H,  $-\text{NCH}_3$ ), 1.11 (s, 12H,  $-\text{NBpin}$ ).

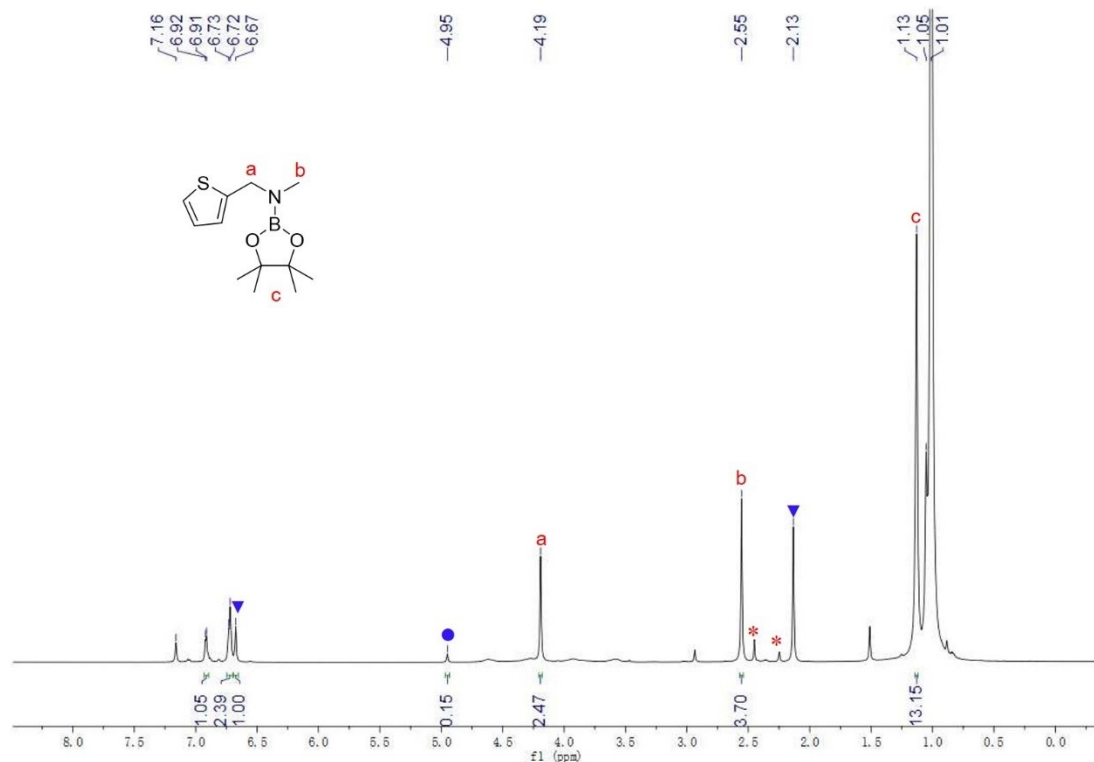

**Fig. S56.** Quantitative <sup>1</sup>H NMR spectrum of the products of the deoxygenative reduction of N-methylthiophene-2-carboxamide catalyzed by 5 mol% La(CH<sub>2</sub>C<sub>6</sub>H<sub>4</sub>NMe<sub>2</sub>-o)<sub>3</sub> at 120 °C for 24 h. \* = pinBCH<sub>2</sub>C<sub>6</sub>H<sub>4</sub>NMe<sub>2</sub>-o, ▼ = 1,3,5-trimethylbenzene, ● = pinBOCH<sub>2</sub>C<sub>4</sub>H<sub>3</sub>S (500 MHz, C<sub>6</sub>D<sub>6</sub>, 25 °C, **2x**, Table 2).

*N*-(Thiophen-2-ylmethyl)-*N*,4,4,5,5-Pentamethyl-1,3,2-Dioxaborolan-2-Amine. <sup>1</sup>H NMR (500 MHz, C<sub>6</sub>D<sub>6</sub>, ppm): δ 6.92 (d, *J* = 4.3 Hz, 1H, -NCH<sub>2</sub>C<sub>4</sub>H<sub>3</sub>S), 6.72 (d, *J* = 5.1 Hz, 2H, -NCH<sub>2</sub>C<sub>4</sub>H<sub>3</sub>S), 4.19 (s, 2H, -NCH<sub>2</sub>C<sub>4</sub>H<sub>3</sub>S), 2.55 (s, 3H, -NCH<sub>3</sub>), 1.13 (s, 12H, -NBpin).

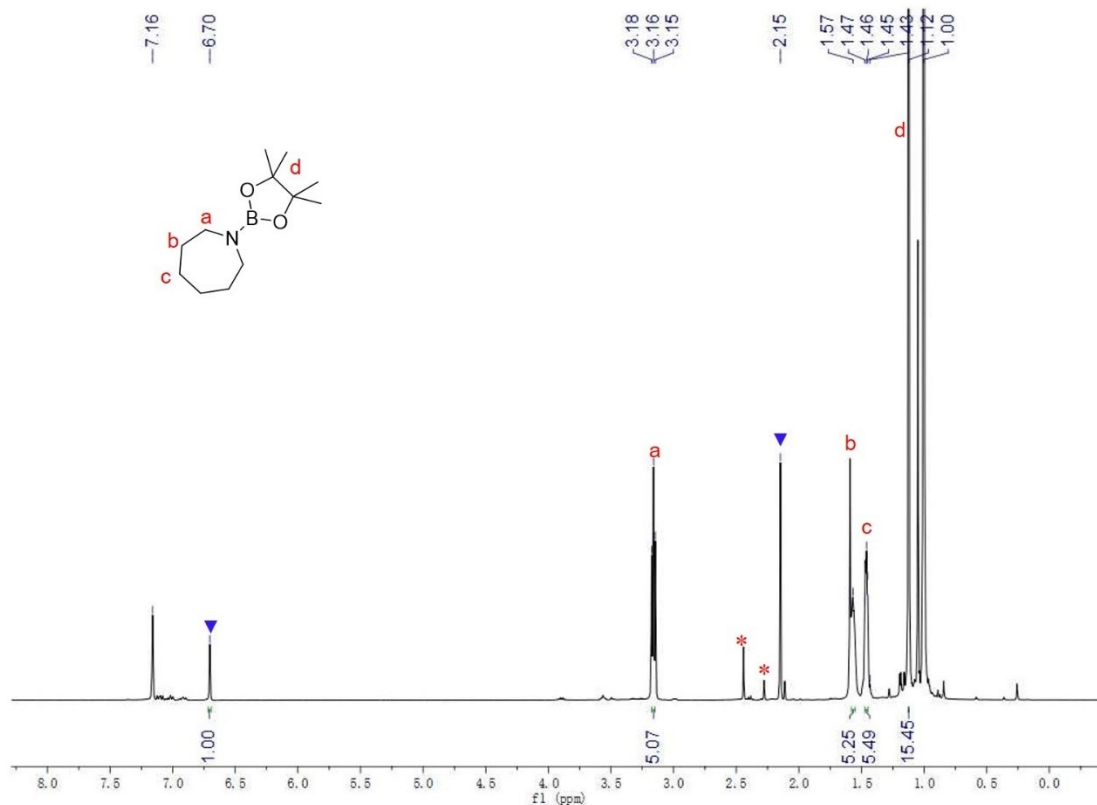

**Fig. S57.** Quantitative <sup>1</sup>H NMR spectrum of the products of the deoxygenative reduction of azepan-2-one catalyzed by 5 mol% La(CH<sub>2</sub>C<sub>6</sub>H<sub>4</sub>NMe<sub>2</sub>-*o*)<sub>3</sub> at 120 °C for 24 h. \* = pinBCH<sub>2</sub>C<sub>6</sub>H<sub>4</sub>NMe<sub>2</sub>-*o*, ▼ = 1,3,5-trimethylbenzene (400 MHz, C<sub>6</sub>D<sub>6</sub>, 25 °C, **2y**, Table 2).

*1-(4,4,5,5-Tetramethyl-1,3,2-Dioxaborolan-2-yl)Azepane*.<sup>3</sup> <sup>1</sup>H NMR (400 MHz, C<sub>6</sub>D<sub>6</sub>, ppm): δ 3.16 (t, *J* = 6.0 Hz, 4H, -NC<sub>6</sub>H<sub>12</sub>), 1.57 (s, 4H, -NC<sub>6</sub>H<sub>12</sub>), 1.50 - 1.44 (m, 4H, -NC<sub>6</sub>H<sub>12</sub>), 1.12 (s, 12H, -NBpin).

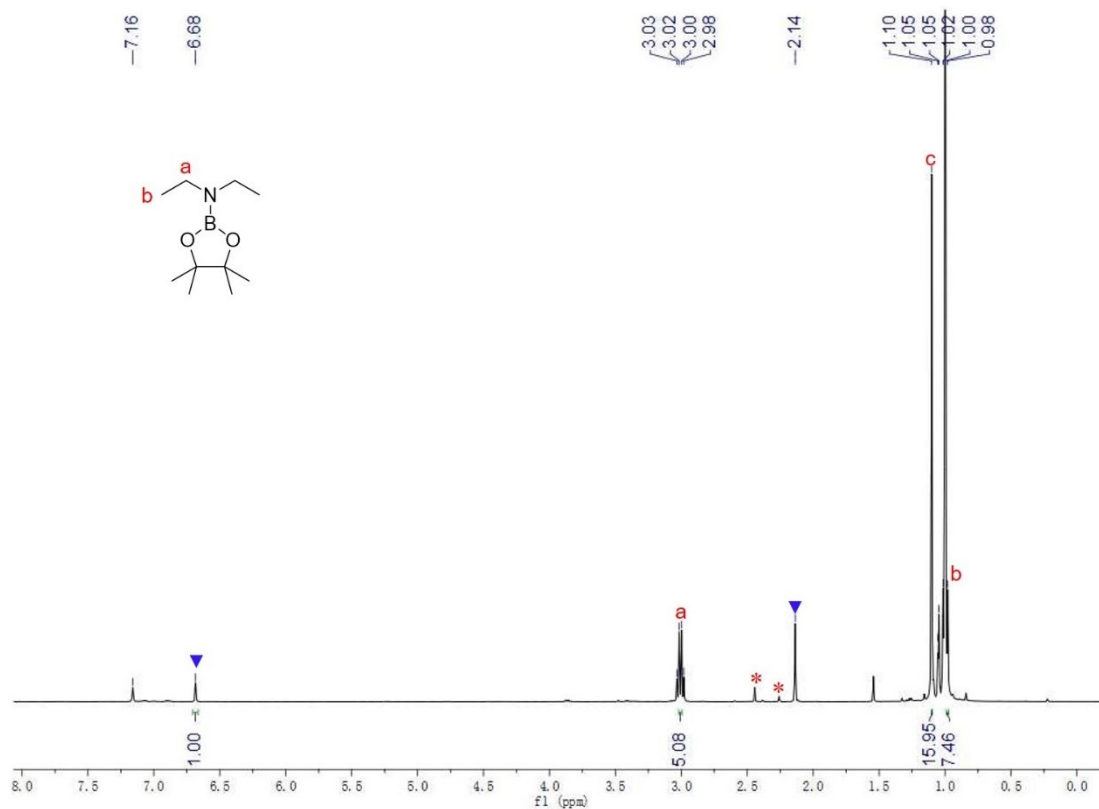

**Fig. S58.** Quantitative <sup>1</sup>H NMR spectrum of the products of the deoxygenative reduction of N-ethylacetamide catalyzed by 5 mol% La(CH<sub>2</sub>C<sub>6</sub>H<sub>4</sub>NMe<sub>2</sub>-o)<sub>3</sub> at 120 °C for 24 h. \* = pinBCH<sub>2</sub>C<sub>6</sub>H<sub>4</sub>NMe<sub>2</sub>-o, ▼ = 1,3,5-trimethylbenzene (400 MHz, C<sub>6</sub>D<sub>6</sub>, 25 °C, **2z**, Table 2).

*N,N*-Diethyl-4,4,5,5-Tetramethyl-1,3,2-Dioxaborolan-2-Amine.<sup>3</sup> <sup>1</sup>H NMR (400 MHz, C<sub>6</sub>D<sub>6</sub>, ppm): δ 3.01 (q, *J* = 7.1 Hz, 4H, -N(CH<sub>2</sub>CH<sub>3</sub>)<sub>2</sub>), 1.10 (s, 12H, -NBpin), 1.00 - 0.98 (m, 6H, -N(CH<sub>2</sub>CH<sub>3</sub>)<sub>2</sub>).

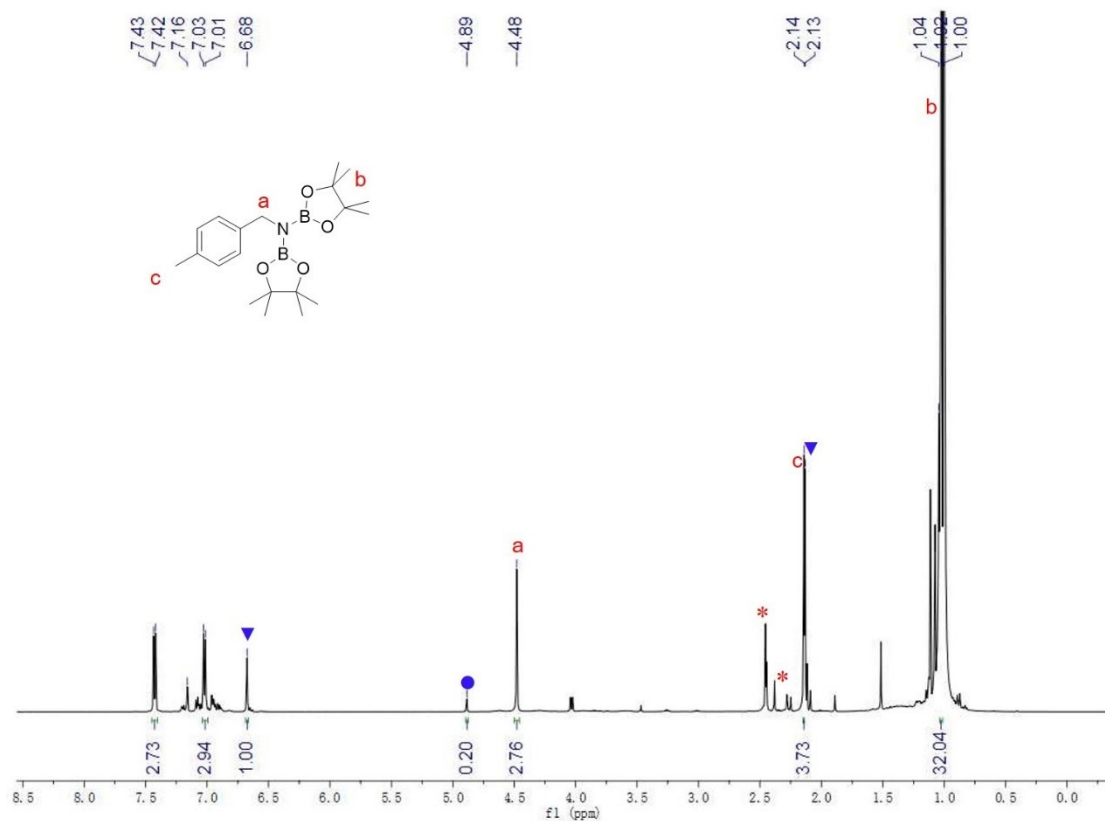

**Fig. S59.** Quantitative <sup>1</sup>H NMR spectrum of the products of the deoxygenative reduction of 4-methylbenzamide catalyzed by 5 mol% La(CH<sub>2</sub>C<sub>6</sub>H<sub>4</sub>NMe<sub>2</sub>-*o*)<sub>3</sub> at 120 °C for 24 h. \* = pinBCH<sub>2</sub>C<sub>6</sub>H<sub>4</sub>NMe<sub>2</sub>-*o*, ▼ = 1,3,5-trimethylbenzene, ● = pinBOCH<sub>2</sub>C<sub>6</sub>H<sub>4</sub>Me-*p* (500 MHz, C<sub>6</sub>D<sub>6</sub>, 25 °C, **3a**, Table3).

*N,N*-Di(4,4,5,5-Tetramethyl-1,3,2-Dioxaborolan-2-Yl)(4-Methylbenzyl)Amine. <sup>1</sup>H NMR (500 MHz, C<sub>6</sub>D<sub>6</sub>, ppm): δ 7.43 (d, *J* = 7.8 Hz, 2H, -*Ph*), 7.02 (d, *J* = 7.8 Hz, 2H, -*Ph*), 4.48 (s, 2H, -NCH<sub>2</sub>PhCH<sub>3</sub>), 2.14 (s, 2H, -NCH<sub>2</sub>PhCH<sub>3</sub>), 1.02 (s, 24H, -N(Bpin)<sub>2</sub>).



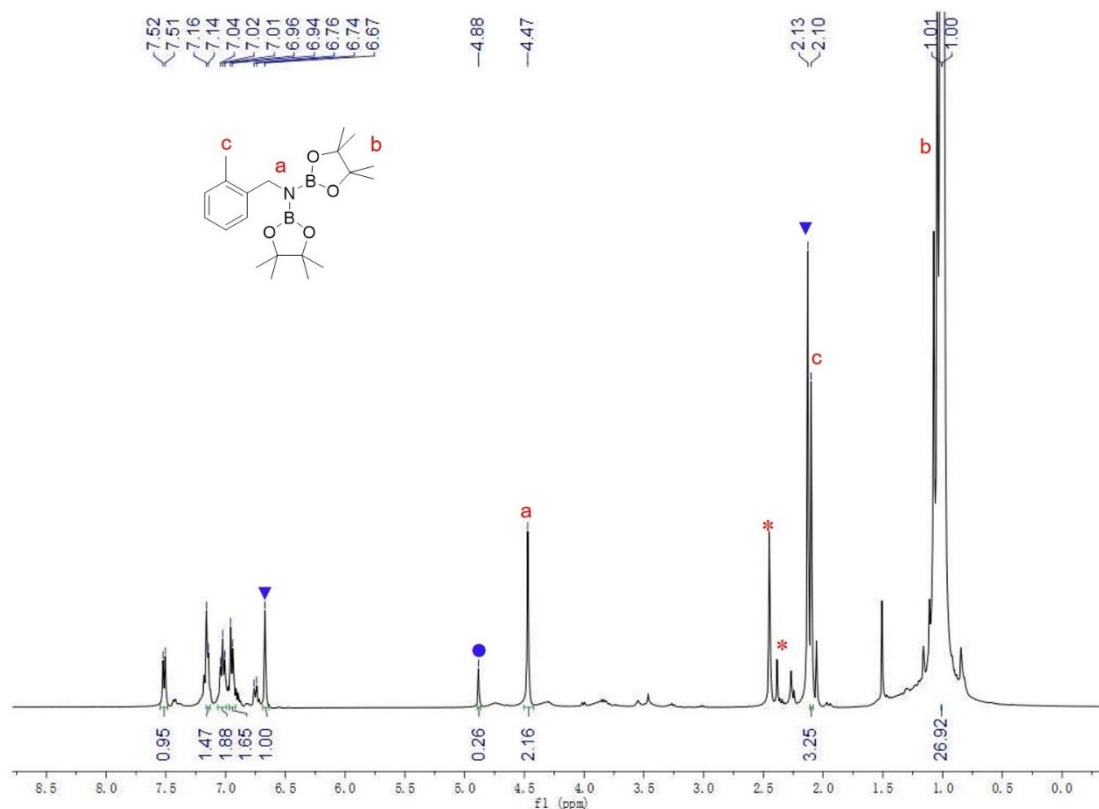

**Fig. S60.** Quantitative <sup>1</sup>H NMR spectrum of the products of the deoxygenative reduction of 2-methylbenzamide catalyzed by 5 mol% La(CH<sub>2</sub>C<sub>6</sub>H<sub>4</sub>NMe<sub>2</sub>-*o*)<sub>3</sub> at 120 °C for 24 h. \* = pinBCH<sub>2</sub>C<sub>6</sub>H<sub>4</sub>NMe<sub>2</sub>-*o*, ▼ = 1,3,5-trimethylbenzene, ● = pinBOCH<sub>2</sub>C<sub>6</sub>H<sub>4</sub>Me-*o* (400 MHz, C<sub>6</sub>D<sub>6</sub>, 25 °C, **3b**, Table3).

*N,N*-Di(4,4,5,5-Tetramethyl-1,3,2-Dioxaborolan-2-yl)(2-Methylbenzyl)Amine. <sup>1</sup>H NMR (400 MHz, C<sub>6</sub>D<sub>6</sub>, ppm): δ 7.51 (d, *J* = 7.6 Hz, 1H, -*Ph*), 7.14 (s, 1H, -*Ph*), 7.03 (t, *J* = 7.3 Hz, 1H, -*Ph*), 6.95 (d, *J* = 7.3 Hz, 1H, -*Ph*), 4.47 (s, 2H, -NCH<sub>2</sub>PhCH<sub>3</sub>), 2.10 (s, 3H, -NCH<sub>2</sub>PhCH<sub>3</sub>), 1.01 (s, 24H, -N(Bpin)<sub>2</sub>).

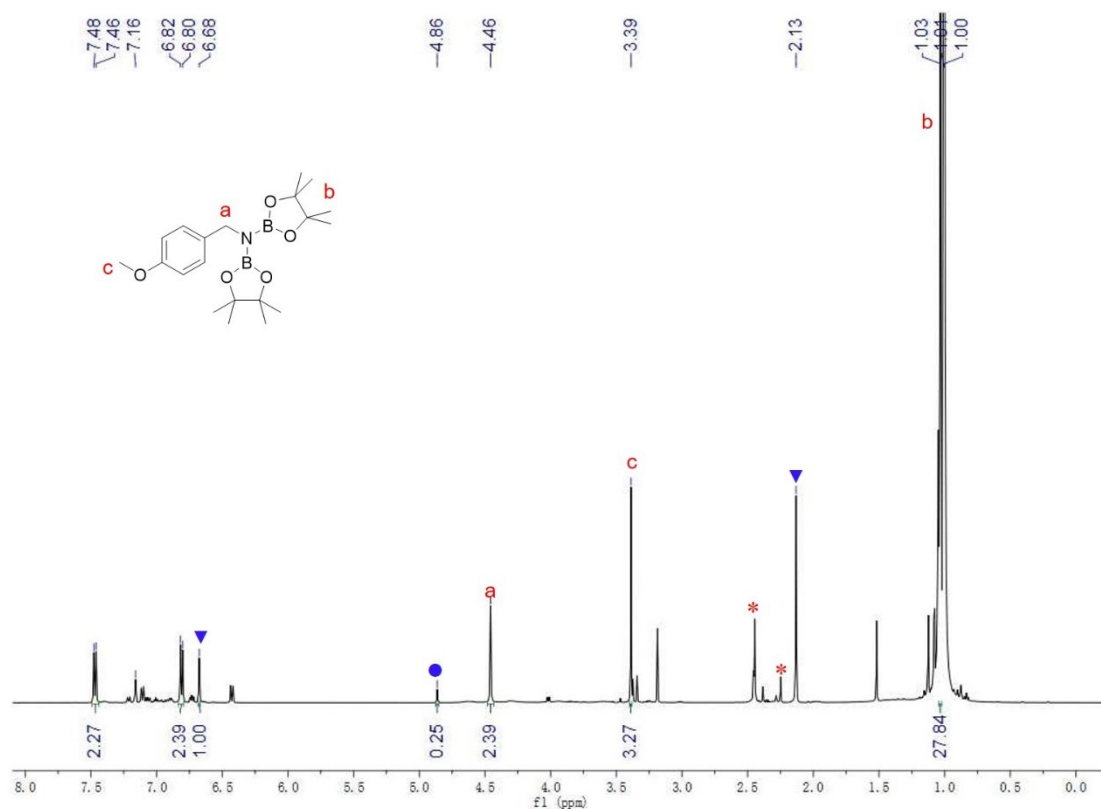

**Fig. S61.** Quantitative <sup>1</sup>H NMR spectrum of the products of the deoxygenative reduction of 4-methoxybenzamide catalyzed by 5 mol% La(CH<sub>2</sub>C<sub>6</sub>H<sub>4</sub>NMe<sub>2</sub>-*o*)<sub>3</sub> at 120 °C for 24 h. \* = pinBCH<sub>2</sub>C<sub>6</sub>H<sub>4</sub>NMe<sub>2</sub>-*o*, ▼ = 1,3,5-trimethylbenzene, ● = pinBOCH<sub>2</sub>C<sub>6</sub>H<sub>4</sub>OMe-*p* (500 MHz, C<sub>6</sub>D<sub>6</sub>, 25 °C, **3c**, Table3).

*N,N*-Di(4,4,5,5-Tetramethyl-1,3,2-Dioxaborolan-2-yl)(4-Methoxybenzyl)Amine. <sup>1</sup>H NMR (500 MHz, C<sub>6</sub>D<sub>6</sub>, ppm): δ 7.47 (d, *J* = 8.5 Hz, 2H, -*Ph*), 6.81 (d, *J* = 8.5 Hz, 2H, -*Ph*), 4.46 (s, 2H, -NCH<sub>2</sub>PhOCH<sub>3</sub>), 3.39 (s, 3H, -NCH<sub>2</sub>PhOCH<sub>3</sub>), 1.03 (s, 24H, -N(Bpin)<sub>2</sub>).

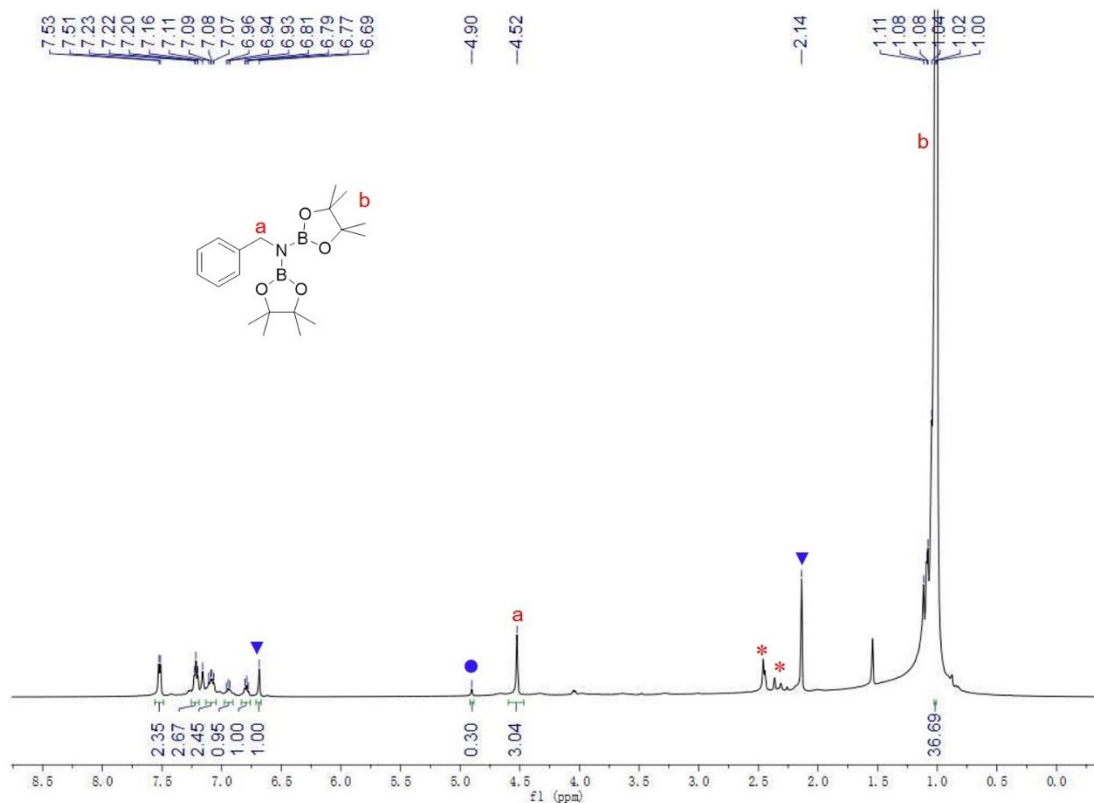

**Fig. S62.** Quantitative  $^1\text{H}$  NMR spectrum of the products of the deoxygenative reduction of benzamide catalyzed by 5 mol%  $\text{La}(\text{CH}_2\text{C}_6\text{H}_4\text{NMe}_2\text{-}o)_3$  at 120  $^\circ\text{C}$  for 24 h. \* =  $\text{pinBCH}_2\text{C}_6\text{H}_4\text{NMe}_2\text{-}o$ ,  $\blacktriangledown$  = 1,3,5-trimethylbenzene,  $\bullet$  =  $\text{pinBOCH}_2\text{C}_6\text{H}_5$  (500 MHz,  $\text{C}_6\text{D}_6$ , 25  $^\circ\text{C}$ , **3d**, Table3).

*N,N*-Di(4,4,5,5-Tetramethyl-1,3,2-Dioxaborolan-2-Yl)Benzylamine.  $^1\text{H}$  NMR (500 MHz,  $\text{C}_6\text{D}_6$ , ppm):  $\delta$  7.52 (d,  $J = 7.2$  Hz, 2H, -Ph), 7.22 (t,  $J = 7.3$  Hz, 1H, -Ph), 7.09 (dd,  $J = 13.7, 7.2$  Hz, 2H, -Ph), 4.52 (s, 2H, - $\text{NCH}_2\text{Ph}$ ), 1.02 (s, 24H, - $\text{N}(\text{Bpin})_2$ ).

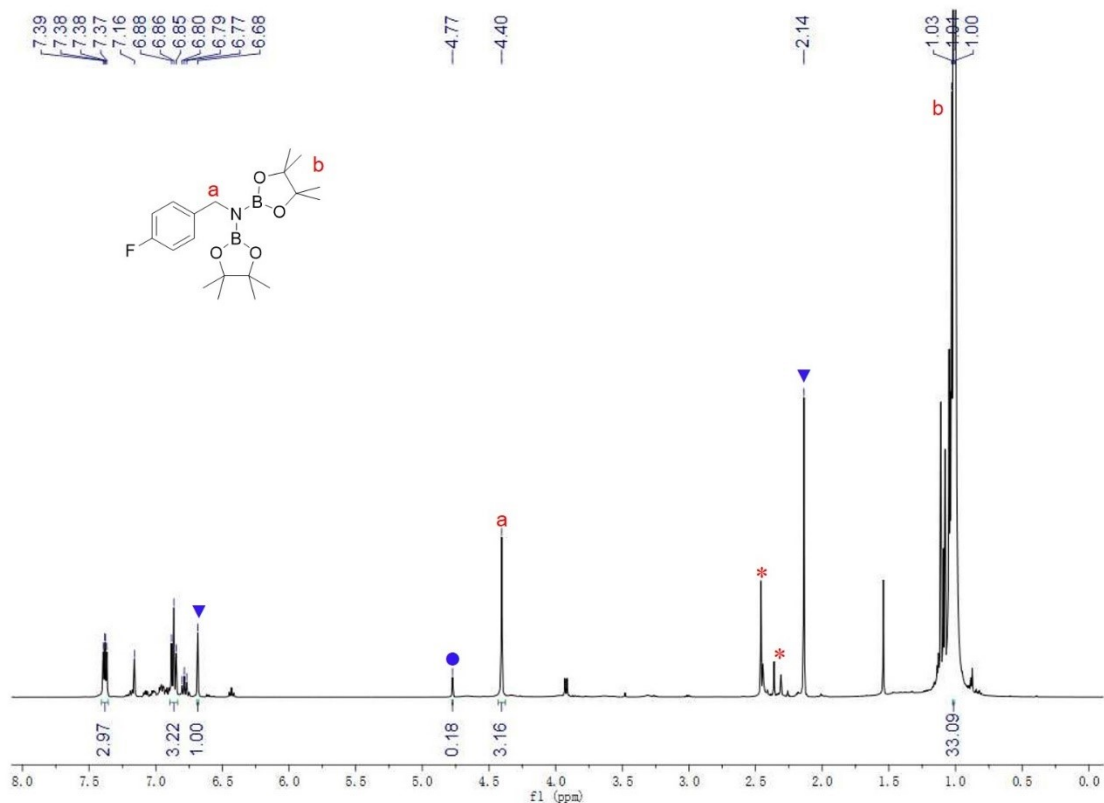

**Fig. S63.** Quantitative  $^1\text{H}$  NMR spectrum of the products of the deoxygenative reduction of benzamide catalyzed by 5 mol%  $\text{La}(\text{CH}_2\text{C}_6\text{H}_4\text{NMe}_2\text{-}o)_3$  at 120  $^\circ\text{C}$  for 24 h. \* = pinBCH $_2$ C $_6$ H $_4$ NMe $_2$ - $o$ , ▼ = 1,3,5-trimethylbenzene, ● = pinBOCH $_2$ C $_6$ H $_4$ F- $p$  (500 MHz,  $\text{C}_6\text{D}_6$ , 25  $^\circ\text{C}$ , **3e**, Table3).

*N,N*-Di(4,4,5,5-Tetramethyl-1,3,2-Dioxaborolan-2-Yl)(4-Fluorobenzyl)Amine.  $^1\text{H}$  NMR (500 MHz,  $\text{C}_6\text{D}_6$ , ppm):  $\delta$  7.38 (dd,  $J = 8.3, 5.7$  Hz, 2H, -Ph), 6.86 (t,  $J = 8.7$  Hz, 2H, -Ph), 4.40 (s, 2H, -NCH $_2$ PhF), 1.01 (s, 24H, -N(Bpin) $_2$ ).

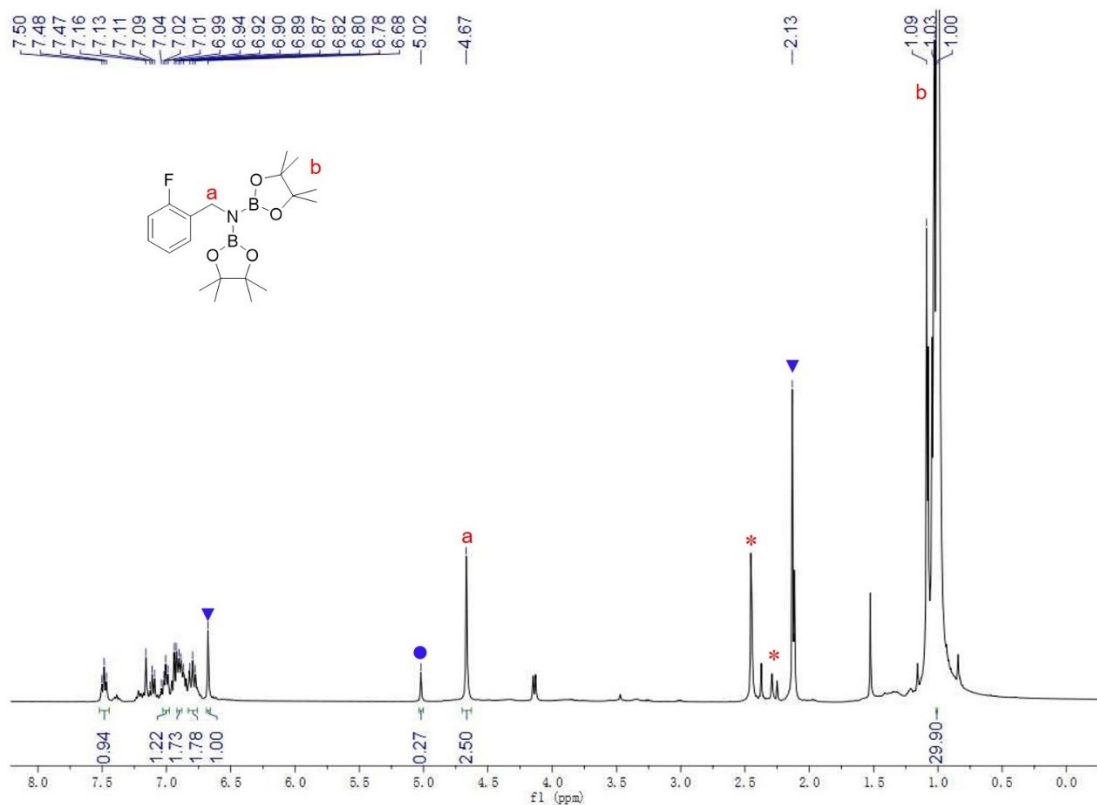

**Fig. S64.** Quantitative  $^1\text{H}$  NMR spectrum of the products of the deoxygenative reduction of 2-fluorobenzamide catalyzed by 5 mol%  $\text{La}(\text{CH}_2\text{C}_6\text{H}_4\text{NMe}_2\text{-}o)_3$  at 120  $^\circ\text{C}$  for 24 h. \* =  $\text{pinBCH}_2\text{C}_6\text{H}_4\text{NMe}_2\text{-}o$ , ▼ = 1,3,5-trimethylbenzene, ● =  $\text{pinBOCH}_2\text{C}_6\text{H}_4\text{F-}o$  (400 MHz,  $\text{C}_6\text{D}_6$ , 25  $^\circ\text{C}$ , **3f**, Table3).

*N,N-Di(4,4,5,5-Tetramethyl-1,3,2-Dioxaborolan-2-Yl)(2-Fluorobenzyl)Amine.*  $^1\text{H}$  NMR (400 MHz,  $\text{C}_6\text{D}_6$ , ppm):  $\delta$  7.48 (t,  $J = 7.2$  Hz, 1H, -Ph), 7.01 (t,  $J = 6.6$  Hz, 1H, -Ph), 6.90 (dd,  $J = 14.4, 8.4$  Hz, 1H, -Ph), 6.80 (t,  $J = 8.6$  Hz, 1H, -Ph), 4.67 (s, 2H, - $\text{NCH}_2\text{PhF}$ ), 1.03 (s, 24H, - $\text{N}(\text{Bpin})_2$ ).

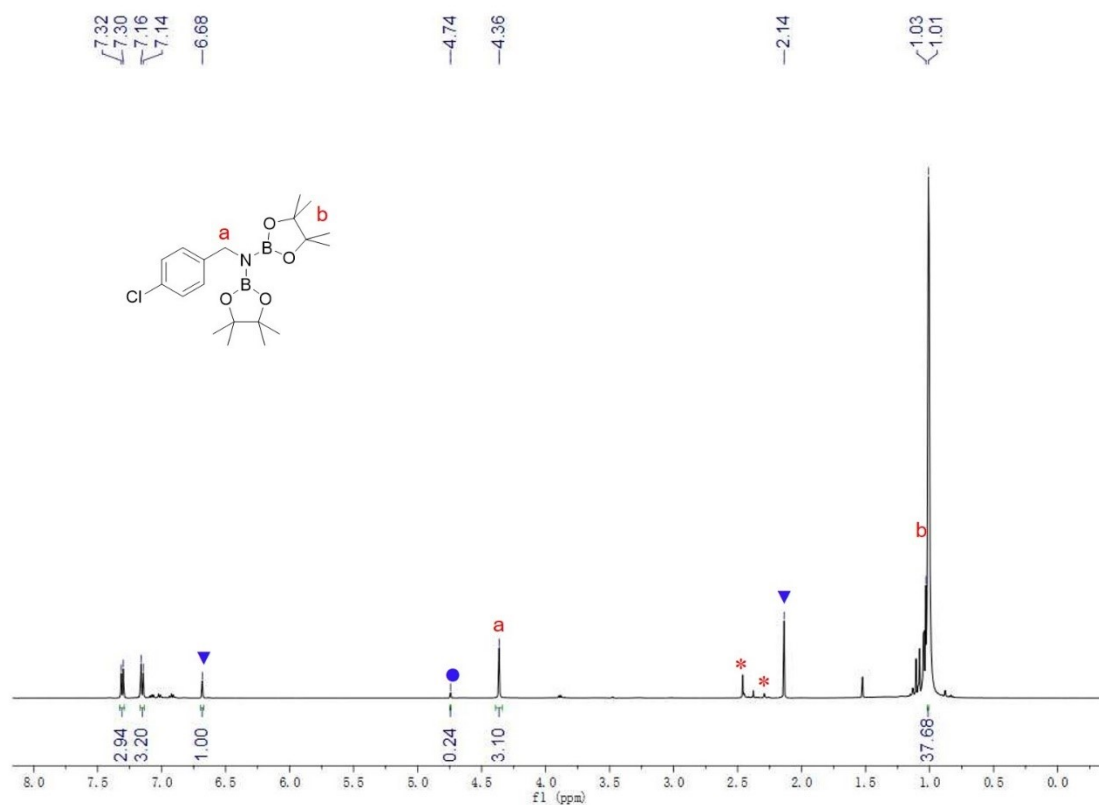

**Fig. S65.** Quantitative <sup>1</sup>H NMR spectrum of the products of the deoxygenative reduction of 4-chlorobenzamide catalyzed by 5 mol% La(CH<sub>2</sub>C<sub>6</sub>H<sub>4</sub>NMe<sub>2</sub>-*o*)<sub>3</sub> at 120 °C for 24 h. \* = pinBCH<sub>2</sub>C<sub>6</sub>H<sub>4</sub>NMe<sub>2</sub>-*o*, ▼ = 1,3,5-trimethylbenzene, ● = pinBOCH<sub>2</sub>C<sub>6</sub>H<sub>4</sub>Cl-*p* (500 MHz, C<sub>6</sub>D<sub>6</sub>, 25 °C, **3g**, Table3).

*N,N*-Di(4,4,5,5-Tetramethyl-1,3,2-Dioxaborolan-2-Yl)(4-Chlorobenzyl)Amine. <sup>1</sup>H NMR (500 MHz, C<sub>6</sub>D<sub>6</sub>, ppm): δ 7.31 (d, *J* = 8.3 Hz, 2H, -*Ph*), 7.15 (d, *J* = 8.4 Hz, 2H, -*Ph*), 4.36 (s, 2H, -NCH<sub>2</sub>PhCl), 1.01 (s, 24H, -N(Bpin)<sub>2</sub>).

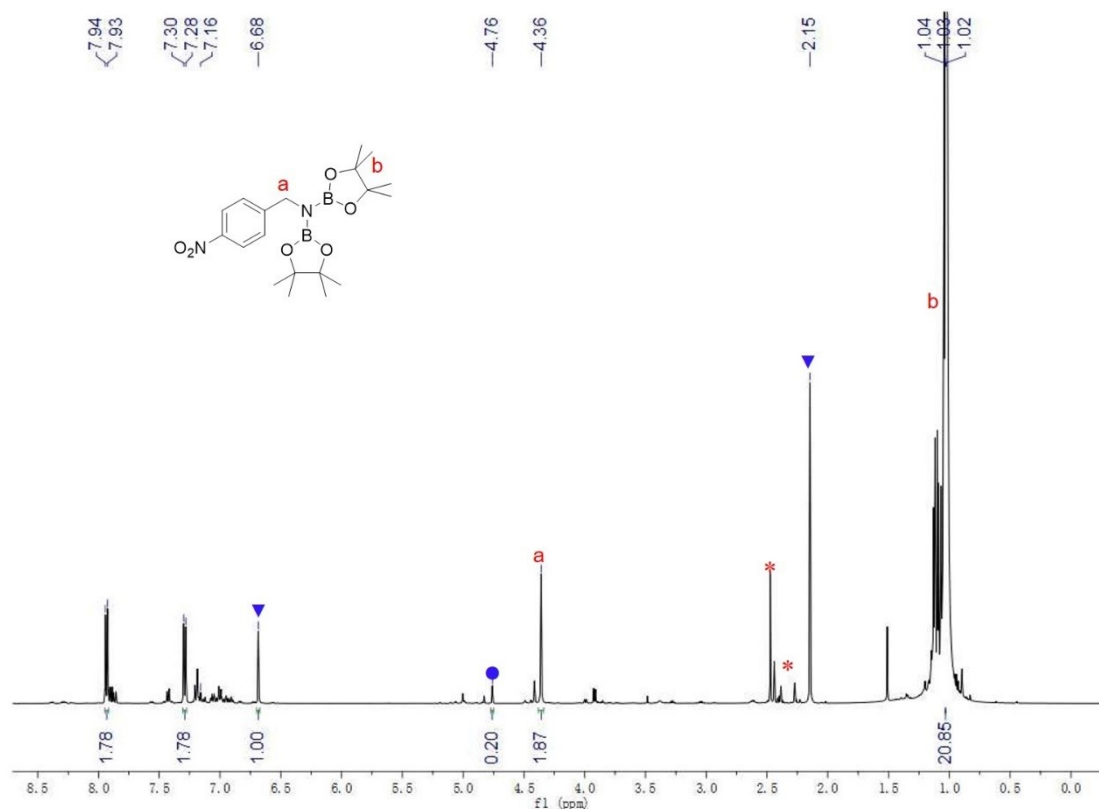

**Fig. S66.** Quantitative <sup>1</sup>H NMR spectrum of the products of the deoxygenative reduction of 4-nitrobenzamide catalyzed by 5 mol% La(CH<sub>2</sub>C<sub>6</sub>H<sub>4</sub>NMe<sub>2</sub>-*o*)<sub>3</sub> at 120 °C for 24 h. \* = pinBCH<sub>2</sub>C<sub>6</sub>H<sub>4</sub>NMe<sub>2</sub>-*o*, ▼ = 1,3,5-trimethylbenzene, ● = pinBOCH<sub>2</sub>C<sub>6</sub>H<sub>4</sub>NO<sub>2</sub>-*p* (500 MHz, C<sub>6</sub>D<sub>6</sub>, 25 °C, **3h**, Table3).

*N,N*-Di(4,4,5,5-Tetramethyl-1,3,2-Dioxaborolan-2-yl)(4-Nitrobenzyl)Amine. <sup>1</sup>H NMR (500 MHz, C<sub>6</sub>D<sub>6</sub>, ppm): δ 7.93 (d, *J* = 8.8 Hz, 2H, -*Ph*), 7.29 (d, *J* = 8.8 Hz, 2H, -*Ph*), 4.36 (s, 2H, -NCH<sub>2</sub>PhNO<sub>2</sub>), 1.03 (s, 24H, -N(Bpin)<sub>2</sub>).

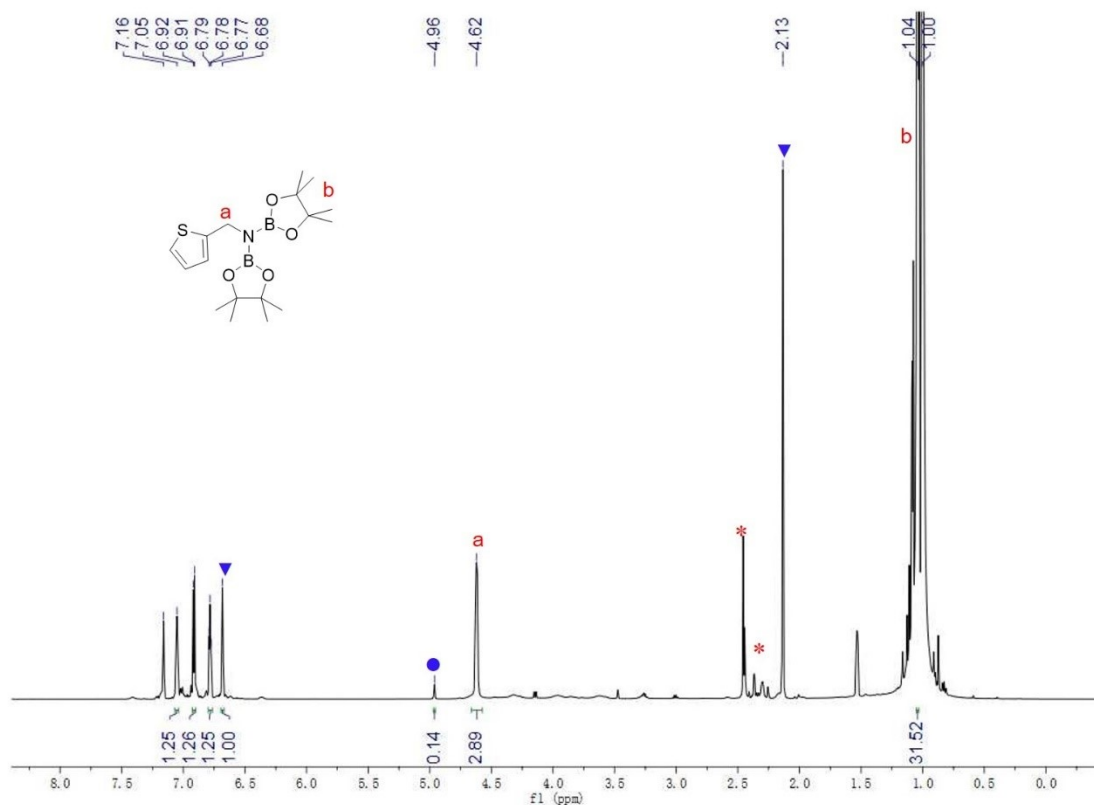

**Fig. S67.** Quantitative <sup>1</sup>H NMR spectrum of the products of the deoxygenative reduction of thiophene-2-carboxamide catalyzed by 5 mol% La(CH<sub>2</sub>C<sub>6</sub>H<sub>4</sub>NMe<sub>2</sub>-*o*)<sub>3</sub> at 120 °C for 24 h. \* = pinBCH<sub>2</sub>C<sub>6</sub>H<sub>4</sub>NMe<sub>2</sub>-*o*, ▼ = 1,3,5-trimethylbenzene, ● = pinBOCH<sub>2</sub>C<sub>4</sub>H<sub>3</sub>S (500 MHz, C<sub>6</sub>D<sub>6</sub>, 25 °C, **3i**, Table3).

*N,N*-Di(4,4,5,5-Tetramethyl-1,3,2-Dioxaborolan-2-yl)-2-Thiophenemethylamine. <sup>1</sup>H NMR (500 MHz, C<sub>6</sub>D<sub>6</sub>, ppm): δ 7.05 (s, 1H, -Ph), 6.91 (d, *J* = 5.1 Hz, 1H, -Ph), 6.78 (t, *J* = 4.0 Hz, 1H, -Ph), 4.62 (s, 2H, -NCH<sub>2</sub>C<sub>4</sub>H<sub>3</sub>S), 1.04 (s, 24H, -N(Bpin)<sub>2</sub>).



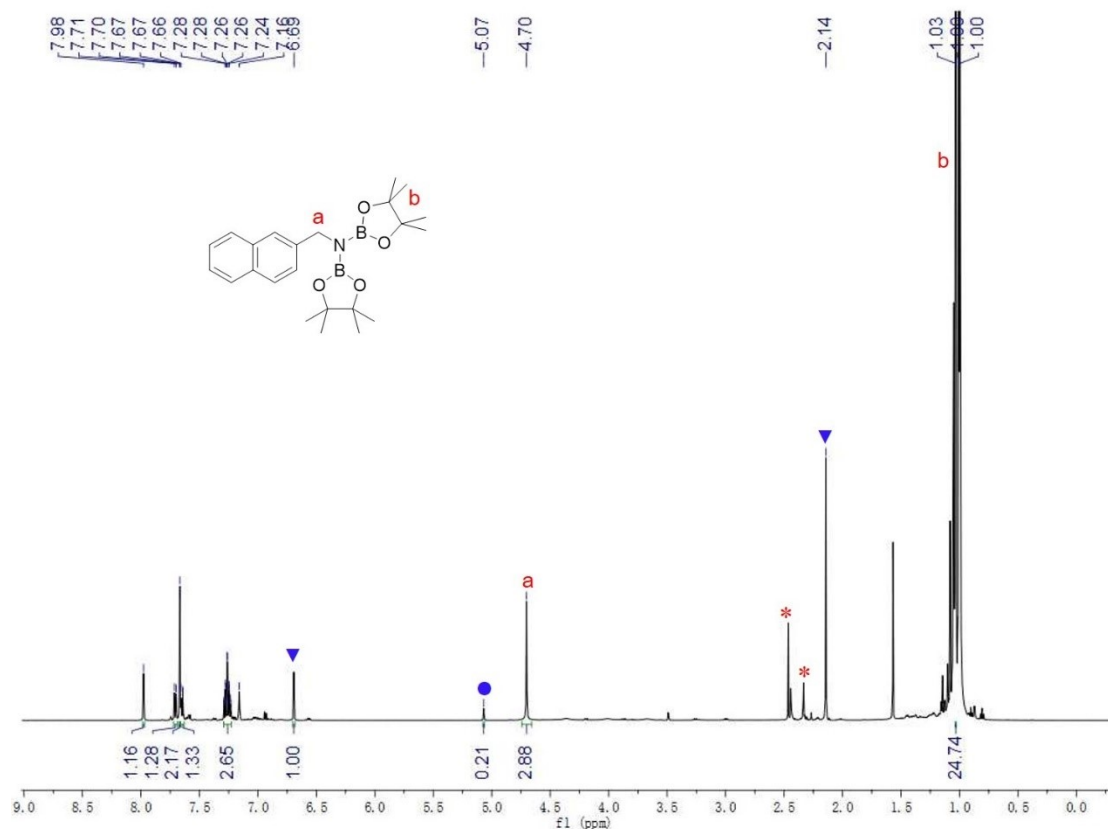

**Fig. S68.** Quantitative  $^1\text{H}$  NMR spectrum of the products of the deoxygenative reduction of 2-naphthamide catalyzed by 5 mol%  $\text{La}(\text{CH}_2\text{C}_6\text{H}_4\text{NMe}_2\text{-}o)_3$  at 120  $^\circ\text{C}$  for 24 h. \* =  $\text{pinBCH}_2\text{C}_6\text{H}_4\text{NMe}_2\text{-}o$ ,  $\blacktriangledown$  = 1,3,5-trimethylbenzene,  $\bullet$  =  $\text{pinBOCH}_2\text{C}_{10}\text{H}_7$  (500 MHz,  $\text{C}_6\text{D}_6$ , 25  $^\circ\text{C}$ , **3j**, Table3).

*N,N*-Di(4,4,5,5-Tetramethyl-1,3,2-Dioxaborolan-2-yl)-1-(Naphthalen-2-yl)Methanamine.  $^1\text{H}$  NMR (500 MHz,  $\text{C}_6\text{D}_6$ , ppm):  $\delta$  7.98 (s, 1H, -Ph), 7.71 (d,  $J$  = 7.3 Hz, 1H, -Ph), 7.67 (d,  $J$  = 1.1 Hz, 2H, -Ph), 7.66 - 7.64 (m, 1H, -Ph), 7.29 - 7.23 (m, 2H, -Ph), 4.70 (s, 2H, - $\text{NCH}_2\text{C}_{10}\text{H}_7$ ), 1.03 (s, 24H, - $\text{N}(\text{Bpin})_2$ ).

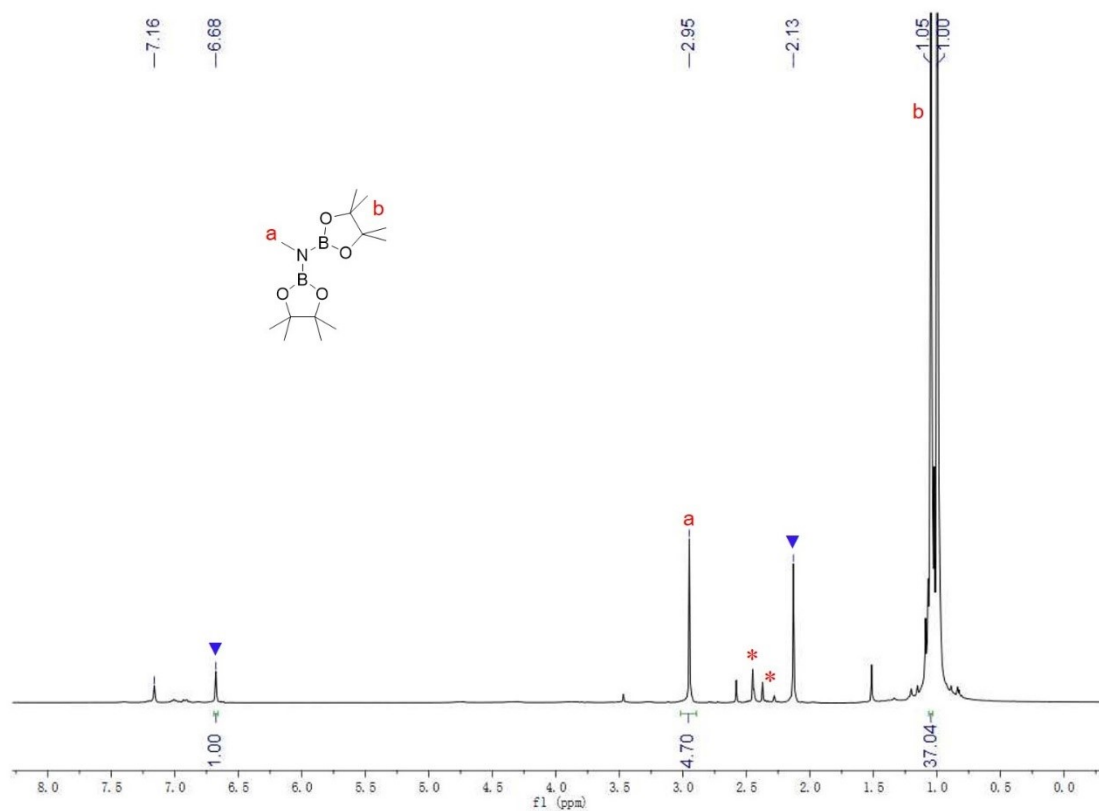

**Fig. S69.** Quantitative <sup>1</sup>H NMR spectrum of the products of the deoxygenative reduction of acetamide catalyzed by 5 mol% La(CH<sub>2</sub>C<sub>6</sub>H<sub>4</sub>NMe<sub>2</sub>-*o*)<sub>3</sub> at 120 °C for 24 h.

\* = pinBCH<sub>2</sub>C<sub>6</sub>H<sub>4</sub>NMe<sub>2</sub>-*o*, ▼ = 1,3,5-trimethylbenzene, (400 MHz, C<sub>6</sub>D<sub>6</sub>, 25 °C, **3k**, Table3).

*N,N*-Di(4,4,5,5-Tetramethyl-1,3,2-Dioxaborolan-2-Yl)Methylamine. <sup>1</sup>H NMR (400 MHz, C<sub>6</sub>D<sub>6</sub>, ppm): δ 2.95 (s, 3H, -NCH<sub>3</sub>), 1.05 (s, 24H, -N(Bpin)<sub>2</sub>).

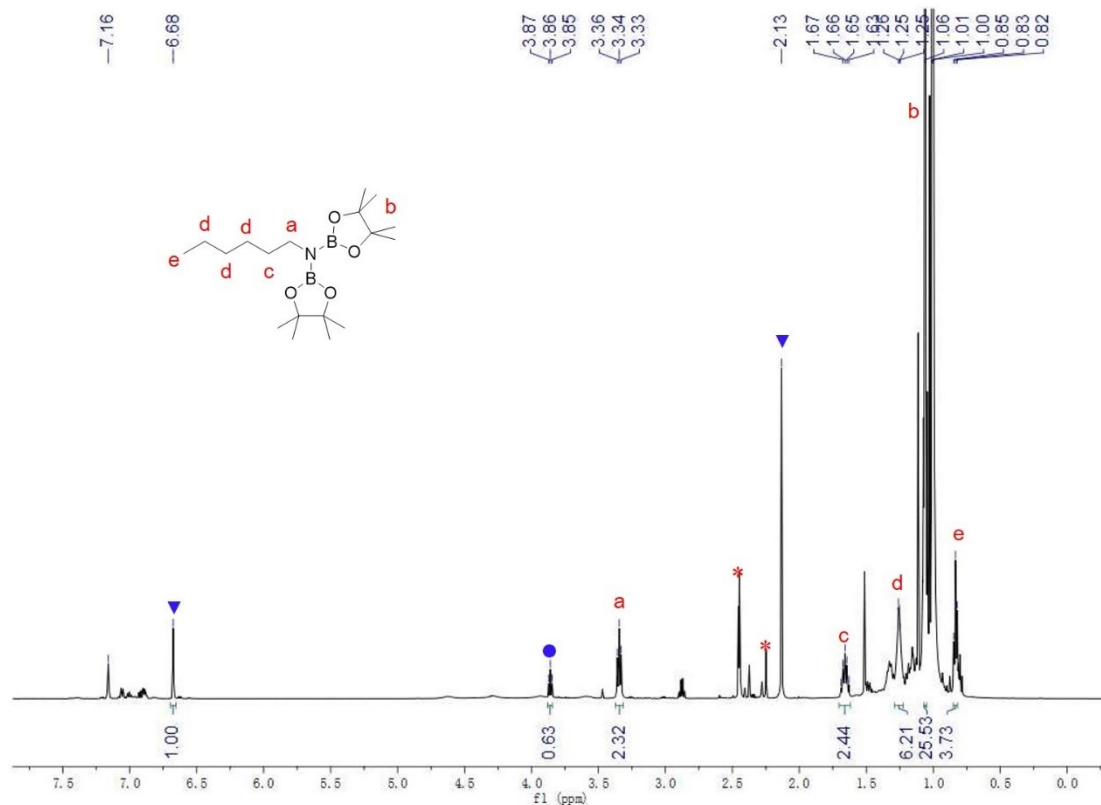

**Fig. S70.** Quantitative  $^1\text{H}$  NMR spectrum of the products of the deoxygenative reduction of hexanamide catalyzed by 5 mol%  $\text{La}(\text{CH}_2\text{C}_6\text{H}_4\text{NMe}_2\text{-}o)_3$  at 120  $^\circ\text{C}$  for 24 h. \* =  $\text{pinBCH}_2\text{C}_6\text{H}_4\text{NMe}_2\text{-}o$ , ▼ = 1,3,5-trimethylbenzene, ● =  $\text{pinBO}(\text{CH}_2)_5\text{CH}_3$  (500 MHz,  $\text{C}_6\text{D}_6$ , 25  $^\circ\text{C}$ , **3I**, Table3).

*N,N*-Di(4,4,5,5-Tetramethyl-1,3,2-Dioxaborolan-2-Yl)Hexylamine.<sup>15</sup>  $^1\text{H}$  NMR (500 MHz,  $\text{C}_6\text{D}_6$ , ppm):  $\delta$  3.34 (t,  $J$  = 7.1 Hz, 2H,  $-\text{N}(\text{CH}_2)_5\text{CH}_3$ ), 1.70 - 1.61 (m, 2H,  $-\text{N}(\text{CH}_2)_5\text{CH}_3$ ), 1.28 - 1.23 (m, 6H,  $-\text{N}(\text{CH}_2)_5\text{CH}_3$ ), 1.06 (s, 24H,  $-\text{N}(\text{Bpin})_2$ ), 0.83 (t,  $J$  = 6.9 Hz, 3H,  $-\text{N}(\text{CH}_2)_5\text{CH}_3$ ).

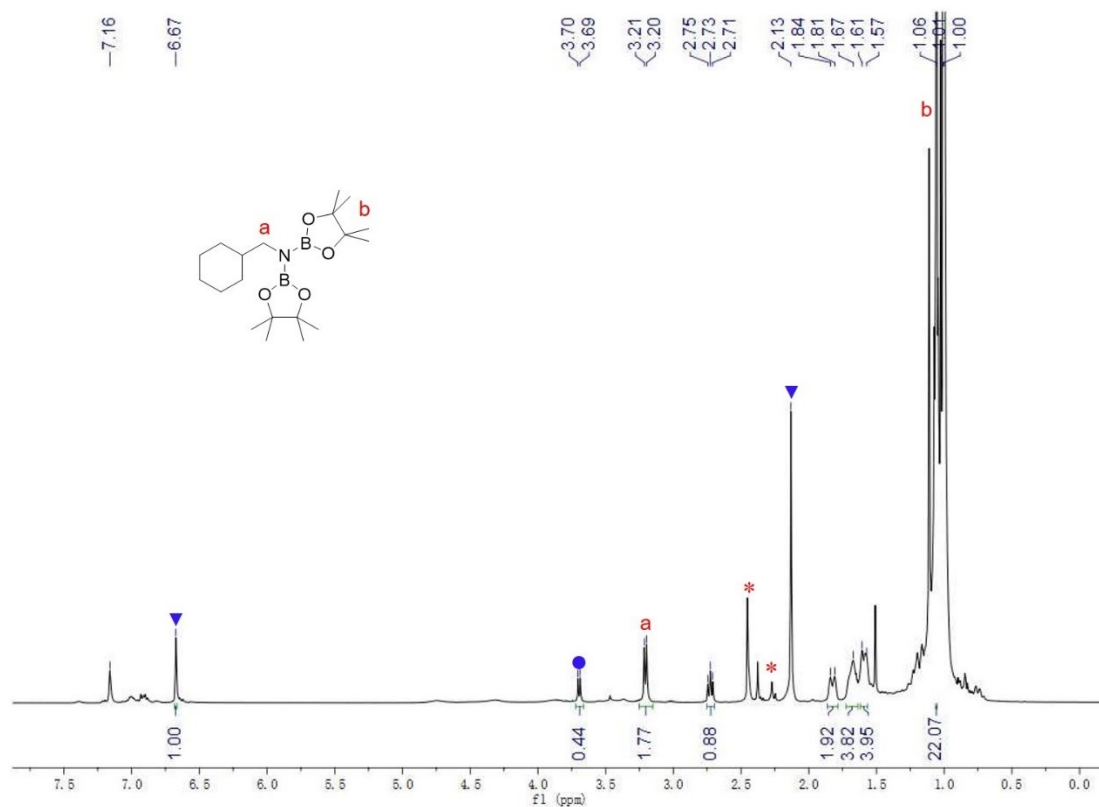

**Fig. S71.** Quantitative  $^1\text{H}$  NMR spectrum of the products of the deoxygenative reduction of cyclohexanecarboxamide catalyzed by 5 mol%  $\text{La}(\text{CH}_2\text{C}_6\text{H}_4\text{NMe}_2\text{-}o)_3$  at 120 °C for 24 h. \* =  $\text{pinBCH}_2\text{C}_6\text{H}_4\text{NMe}_2\text{-}o$ ,  $\blacktriangledown$  = 1,3,5-trimethylbenzene,  $\bullet$  =  $\text{pinBOCH}_2\text{C}_6\text{H}_{11}$  (400 MHz,  $\text{C}_6\text{D}_6$ , 25 °C, **3m**, Table3).

*N,N*-Di(4,4,5,5-Tetramethyl-1,3,2-Dioxaborolan-2-Yl)-1-Cyclohexyl-Methenamine.

$^1\text{H}$  NMR (400 MHz,  $\text{C}_6\text{D}_6$ , ppm):  $\delta$  3.21 (d,  $J = 7.1$  Hz, 2H,  $-\text{NCH}_2\text{C}_6\text{H}_{11}$ ), 2.73 (t,  $J = 7.2$  Hz, 1H,  $-\text{NCH}_2\text{C}_6\text{H}_{11}$ ), 1.82 (d,  $J = 12.5$  Hz, 2H,  $-\text{NCH}_2\text{C}_6\text{H}_{11}$ ), 1.67 (s, 4H,  $-\text{NCH}_2\text{C}_6\text{H}_{11}$ ), 1.59 (d,  $J = 13.5$  Hz, 4H,  $-\text{NCH}_2\text{C}_6\text{H}_{11}$ ), 1.06 (s, 24H,  $-\text{N}(\text{Bpin})_2$ ).

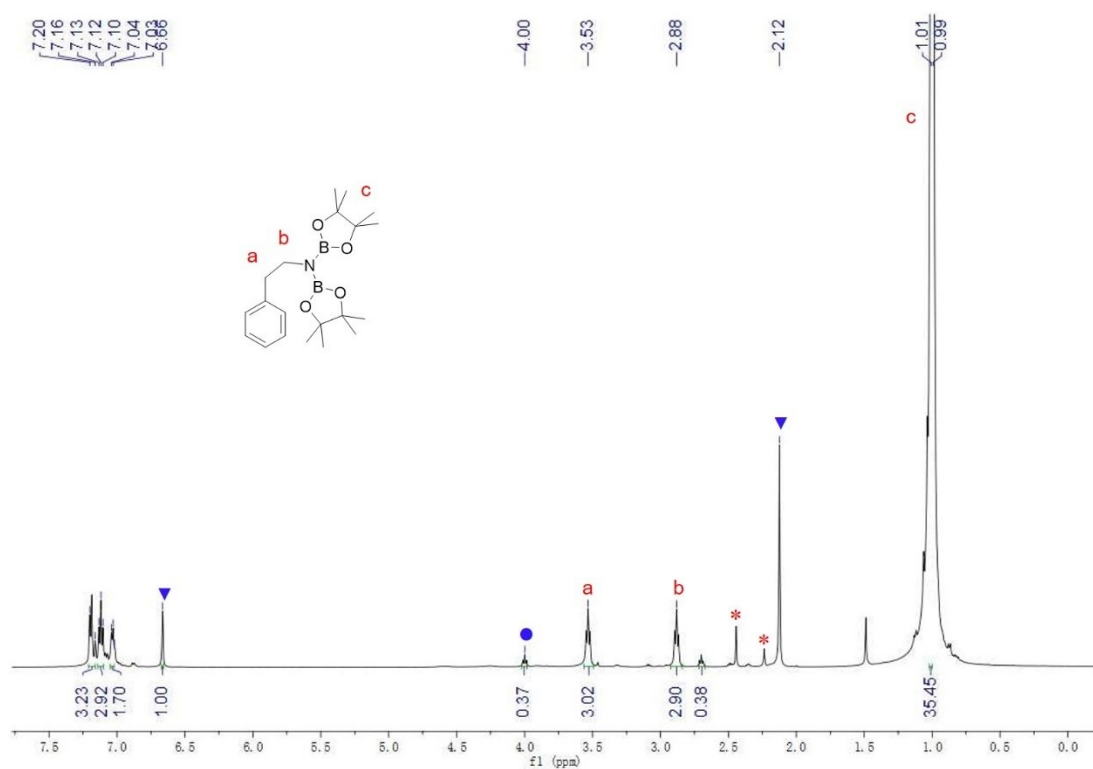

**Fig. S72.** Quantitative <sup>1</sup>H NMR spectrum of the products of the deoxygenative reduction of 2-phenylacetamide catalyzed by 5 mol% La(CH<sub>2</sub>C<sub>6</sub>H<sub>4</sub>NMe<sub>2</sub>-o)<sub>3</sub> at 120 °C for 24 h. \* = pinBCH<sub>2</sub>C<sub>6</sub>H<sub>4</sub>NMe<sub>2</sub>-o, ▼ = 1,3,5-trimethylbenzene, ● = pinBO(CH<sub>2</sub>)<sub>2</sub>C<sub>6</sub>H<sub>5</sub> (500 MHz, C<sub>6</sub>D<sub>6</sub>, 25 °C, **3n**, Table3).

*N,N-Di(4,4,5,5-Tetramethyl-1,3,2-Dioxaborolan-2-Yl)-2-Phenethylamine.* <sup>1</sup>H NMR (500 MHz, C<sub>6</sub>D<sub>6</sub>, ppm): δ 7.18 (d, *J* = 20.1 Hz, 2H, -Ph), 7.12 (t, *J* = 7.5 Hz, 2H, -Ph), 7.05 - 7.00 (m, 1H, -Ph), 3.53 (t, *J* = 7.2 Hz, 2H, -N(CH<sub>2</sub>)<sub>2</sub>Ph), 2.88 (t, *J* = 7.2 Hz, 2H, -N(CH<sub>2</sub>)<sub>2</sub>Ph), 1.01 (s, 24H, -N(Bpin)<sub>2</sub>).

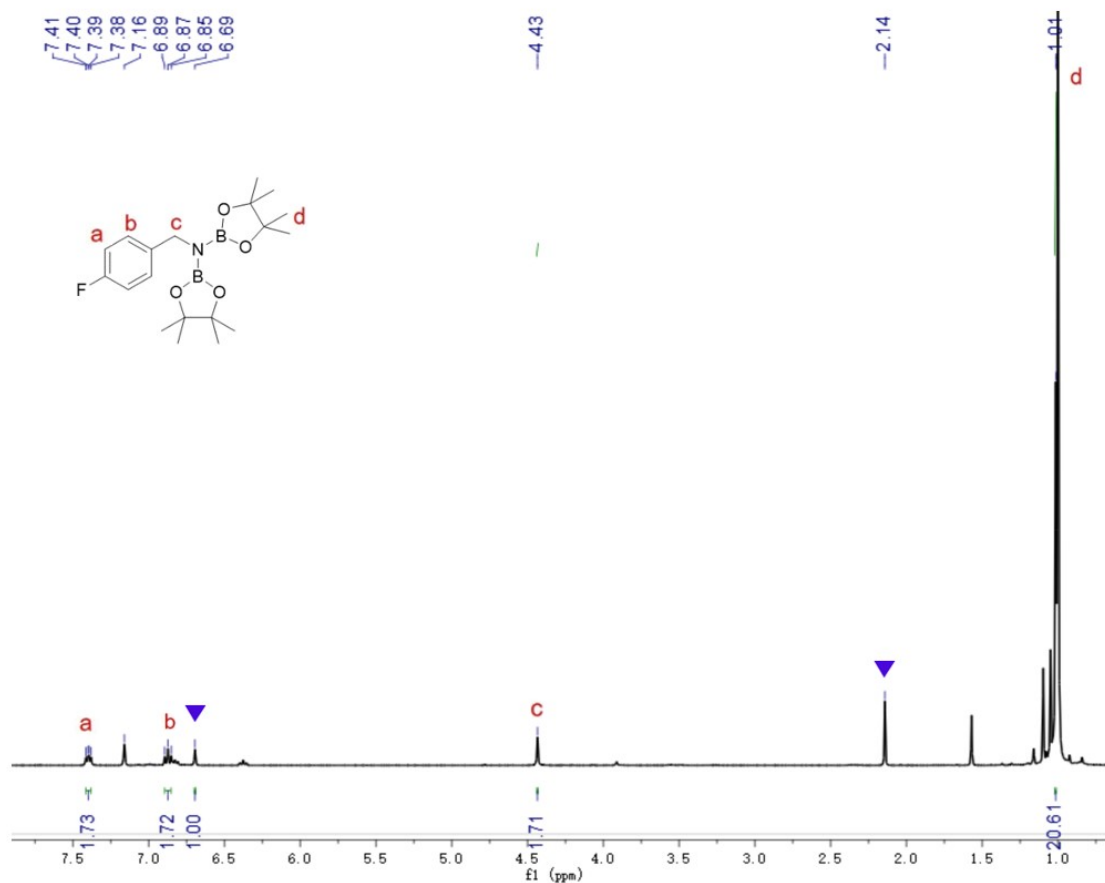

**Fig. S73.** Quantitative <sup>1</sup>H NMR spectrum of the products generated in situ from the reaction of 4-Fluorobenzamide with HBpin at 120 °C for 36 h without using the catalyst. ▼ = 1,3,5-trimethylbenzene. (400 MHz, C<sub>6</sub>D<sub>6</sub>, 25 °C).

*N,N*-Di(4,4,5,5-Tetramethyl-1,3,2-Dioxaborolan-2-yl)(4-Fluorobenzyl)Amine. <sup>1</sup>H NMR (400 MHz, C<sub>6</sub>D<sub>6</sub>, ppm): δ 7.40 (dd, *J* = 8.4 Hz, 5.7 Hz, 2H, -Ph), 6.87 (t, *J* = 8.7 Hz, 2H, -Ph), 4.43 (s, 2H, -NCH<sub>2</sub>PhF), 1.01 (s, 24H, -N(Bpin)<sub>2</sub>).

## 9. References

- (1) M. Itazaki, K. Ueda, Nakazawa, *Angew. Chem. Int. Ed.*, 2009, **48**, 3313-3316.
- (2) L. Jing, X. N. Han, H. Y. Zhou, Y. Han, C. F. Chen, *J. Org. Chem.*, 2020, **85**, 11465-11474.
- (3) C. Yu, C. J. Guo, L. H. Jiang, M. L. Gong, Y. J. Luo, *Organometallics*, 2021, **40**, 1201-1206.
- (4) W. L. Xie, M. D. Zhao, C. M. Cui, *Organometallics*, 2013, **32**, 7440-7444.
- (5) T. J. Steiman, C. Uyeda, *J. Am. Chem. Soc.*, 2015, **137**, 6104-6110.
- (6) P. Q. Ye, Y. L. Shao, X. Z. Ye, F. J. Zhang, R. H. Li, J. N. Sun, B. H. Xu, J. X. Chen, *Org. Lett.*, 2020, **22**, 1306-1310.
- (7) D. J. Hale, L. J. Murphy, R. McDonald, M. J. Ferguson, L. Turculet, *ChemCatChem*, 2019, **11**, 3818-3827.
- (8) Y. Corre, V. Rysak, M. Nagyházi, D. Kalocsai, X. Trivelli, J. P. Djukic, F. Agbossou-Niedercorn, C. Michon, *Eur. J. Org. Chem.*, 2020, **39**, 6212-6220.
- (9) Y. C. Lin, E. Hatzakis, S. M. McCarthy, K. D. Reichl, T. Y. Lai, H. P. Yennawar, A. T. Radosevich, *J. Am. Chem. Soc.*, 2017, **139**, 6008-6016.
- (10) C. Ghosh, S. Kim, M. R. Mena, J. H. Kim, R. Pal, C. L. Rock, T. L. Groy, M. H. Baik, R. J. Trovitch, *J. Am. Chem. Soc.*, 2019, **141**, 15327-15337.
- (11) V. K. Pandey, S. N. R. Donthireddy, A. Rit, *Chem. Asian. J.*, 2019, **14**, 3255-3258.
- (12) M. Arrowsmith, M. S. Hill, G. Kociok-Köhn, *Chem. Eur. J.*, 2013, **19**, 2776-2783.
- (13) K. A. Gudun, M. Segizbayev, A. Adamov, P. N. Plessow, K. A. Lyssenko, M. P. Balanay, A. Y. Khalimon, *Dalton Trans.*, 2019, **48**, 1732-1746.
- (14) R. K. Sahoo, N. Sarkar, S. Nembenna, *Angew. Chem. Int. Ed.*, 2021, **60**, 11991-

12000.

- (15) J. C. Babón, M. A. Esteruelas, I. Fernández, A. M. López, E. Oñate,  
*Organometallics*, 2020, **39**, 3864-3872.
